# Supplementary material for: Genomic Characterization of Cisplatin Response Uncovers Priming of Cisplatin-Induced Genes in a Resistant Cell Line
Source: MDPI journal article supplement (doi:10.3390/ijms22115814), 2021-05-28
Supplement: s1 [file s1]

## Supplementary Figures

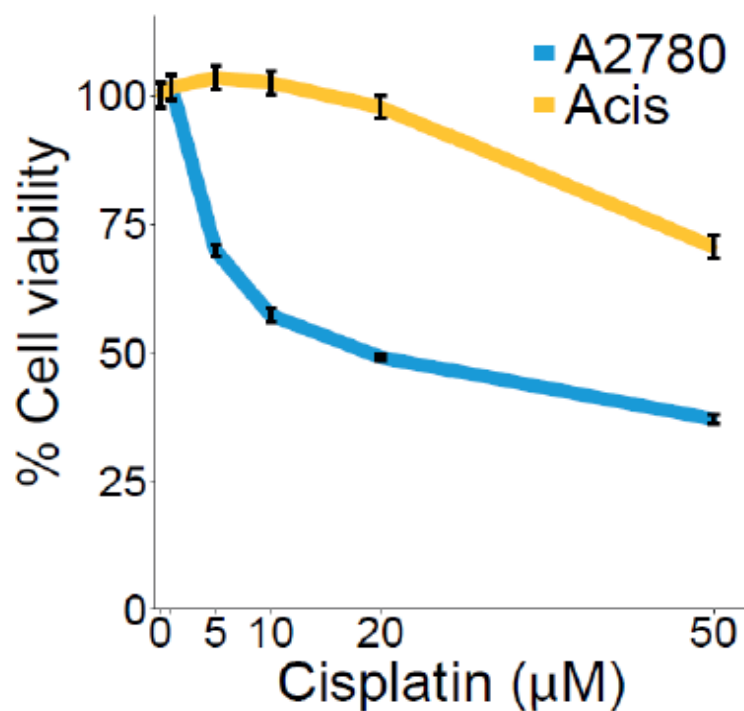

**Figure S1.** cell viability of A2780 (cisplatin sensitive) and Acis (cisplatin resistant) cell lines following increasing cisplatin doses.

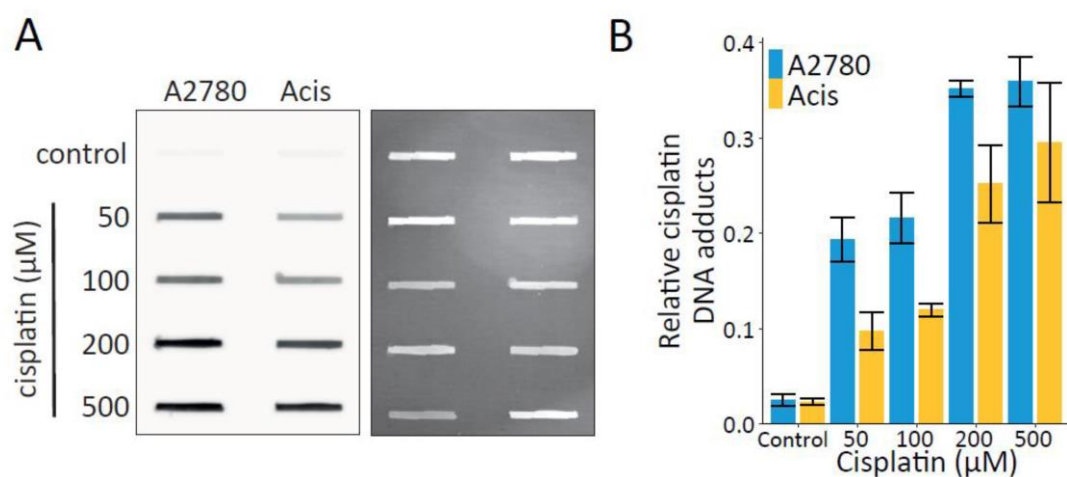

**Figure S2.** (A) Representative cisplatin initial damage signal detected by immuno-slot blotting (left panel) following increasing cisplatin doses treatment (50 $\mu\text{M}$ –500 $\mu\text{M}$ ). Total nucleic acid amounts measured by SYBR-Gold staining (right panel). (B) Damage signal normalized to total nucleic acid amounts. Average and error bars (SEM) are shown for data from two biological replicates.

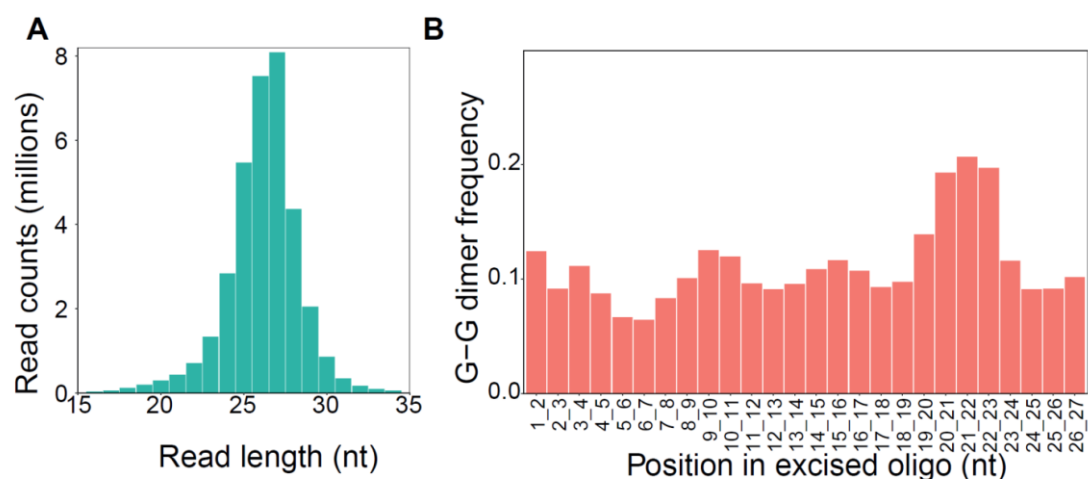

**Figure S3.** XR-Seq data quality control. **(A)** Representative distribution of excised oligonucleotide sequence lengths, calculated after removal of flanking adapter sequences from sequences 50-nt reads. **(B)** Representative frequency of the G-G dinucleotide at each position of the 27-nt-long XR-Seq excision fragments. Data presented from replicate 1 of A2780.

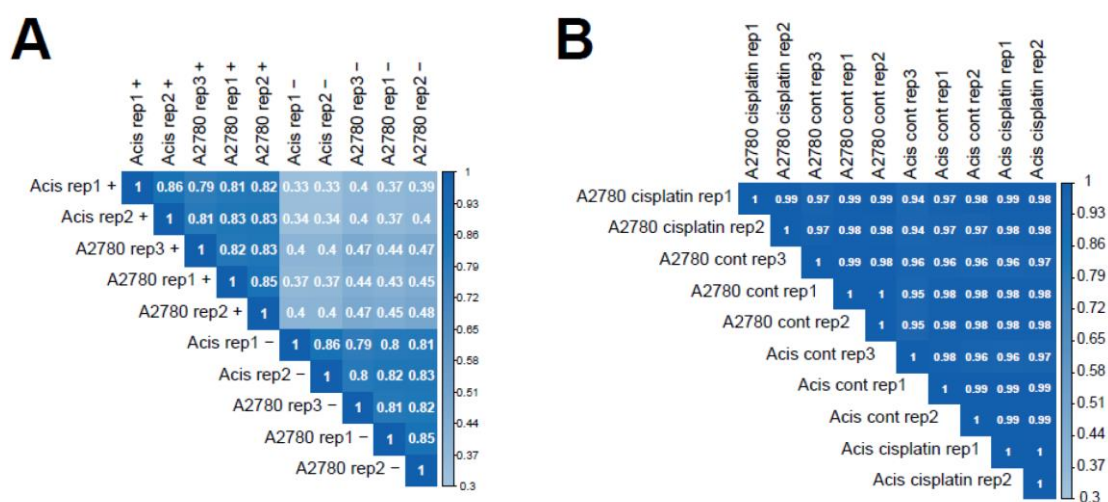

**Figure S4.** **(A)** Pearson correlation between cisplatin XR-Seq libraries calculated over 700 bp windows. **(B)** Pearson correlation between ATAC-Seq libraries calculated over union set of peaks from all four conditions.
