# Supplementary material for: Genomic Characterization of Cisplatin Response Uncovers Priming of Cisplatin-Induced Genes in a Resistant Cell Line
Source: Int J Mol Sci. 2021 May 28;22(11):5814. doi: 10.3390/ijms22115814 (PMC8198185; doi:10.3390/ijms22115814)
Supplement: Supplementary file 1 [file ijms-22-05814-s001.zip › Supplementary Tables 1-7.xlsx]

## Sheet: Table 1
Table 1. Upregulated genes in A2780 following cisplatin
gene	gene_name	log2FC	padj
ENSG00000220563	PKMP3	6.33468	6.69539e-06
ENSG00000162771	FAM71A	5.91679	6.51617e-05
ENSG00000249934	NCOA4P2	5.76828	0.000527625
ENSG00000105369	CD79A	5.56161	0.00060424
ENSG00000205890		5.39943	0.000513044
ENSG00000231090	MIR4422HG	5.32609	0.00284546
ENSG00000239605	STPG4	5.20097	0.00118697
ENSG00000263201	DPEP2NB	5.20037	0.00353129
ENSG00000235098	ANKRD65	5.19581	0.00449017
ENSG00000241933	DENND6A-DT	5.19336	0.00587673
ENSG00000188573	FBLL1	5.05987	0.00147534
ENSG00000285480	H2BE1	4.89646	0.00650667
ENSG00000277399	GPR179	4.89645	0.003023
ENSG00000260996		4.89508	0.00808062
ENSG00000271714		4.80037	0.00930228
ENSG00000204421	LY6G6C	4.7253	0.00810389
ENSG00000251075	HTT-AS	4.72069	0.0109956
ENSG00000280422		4.70302	0.00535308
ENSG00000272977		4.62395	0.0122379
ENSG00000182795	C1orf116	4.6038	0.00782924
ENSG00000179921	GPBAR1	4.59646	0.00419654
ENSG00000245059		4.54883	0.00650753
ENSG00000154122	ANKH	4.51166	0.00211737
ENSG00000268307	LINC02560	4.4979	0.0121834
ENSG00000286234		4.4919	0.0104579
ENSG00000197520	FAM177B	4.48122	0.0123939
ENSG00000189001	SBSN	4.42335	0.00119505
ENSG00000233930	KRTAP5-AS1	4.24688	0.0279522
ENSG00000286128		4.23426	0.0220577
ENSG00000177340		4.21025	1.22146e-05
ENSG00000164175	SLC45A2	4.18049	0.0309124
ENSG00000272588		4.1768	0.0226807
ENSG00000234502	FYTTD1P1	4.13847	0.000164652
ENSG00000261026		4.12342	1.82491e-07
ENSG00000146453	PNLDC1	4.05376	0.000316594
ENSG00000228643		4.04053	0.00587393
ENSG00000229893		4.01682	0.0394901
ENSG00000124713	GNMT	3.9822	0.0302912
ENSG00000258334		3.97704	0.019664
ENSG00000126759	CFP	3.96399	0.00517667
ENSG00000280067		3.93664	0.0314747
ENSG00000287089		3.93662	0.0332929
ENSG00000231966	LINC02818	3.93296	0.0312282
ENSG00000276945		3.86418	0.0137405
ENSG00000254910		3.84564	0.0387031
ENSG00000267078		3.77419	0.000324897
ENSG00000105219	CNTD2	3.75883	0.0472974
ENSG00000230408	BZW1-AS1	3.75405	0.0476389
ENSG00000267308	LINC01764	3.75079	0.0439838
ENSG00000177606	JUN	3.71881	1.67267e-33
ENSG00000110876	SELPLG	3.68827	0.0172005
ENSG00000184716	SERINC4	3.66472	0.00309089
ENSG00000236383	CCDC200	3.64444	0.0268503
ENSG00000260001	TGFBR3L	3.60628	0.0208227
ENSG00000272103		3.5518	4.92963e-09
ENSG00000165118	C9orf64	3.53781	0.0301631
ENSG00000106328	FSCN3	3.47988	0.000153917
ENSG00000170345	FOS	3.47696	1.88328e-178
ENSG00000166428	PLD4	3.46157	0.0360453
ENSG00000234869		3.45299	0.00239094
ENSG00000262165		3.34285	0.0338775
ENSG00000126803	HSPA2	3.33978	0.000146157
ENSG00000261610		3.32846	0.0362953
ENSG00000275846		3.28469	7.28289e-05
ENSG00000224977	LINC02776	3.28272	0.00259641
ENSG00000254213	PRXL2AP2	3.27762	0.00035431
ENSG00000272990		3.27349	0.0401572
ENSG00000272056		3.23872	0.00280596
ENSG00000261359	PYCARD-AS1	3.23325	3.4558e-05
ENSG00000277452	RN7SL473P	3.22173	0.000601308
ENSG00000101222	SPEF1	3.21043	5.69978e-08
ENSG00000277895		3.21015	0.00390087
ENSG00000143632	ACTA1	3.19167	0.0188157
ENSG00000242791		3.16173	0.000268133
ENSG00000273175		3.15957	0.000894125
ENSG00000124216	SNAI1	3.12938	2.61422e-24
ENSG00000185988	PLK5	3.1247	1.30485e-06
ENSG00000189030	VHLL	3.11308	0.00536899
ENSG00000199179	MIRLET7I	3.07166	0.022991
ENSG00000185338	SOCS1	3.04366	6.1405e-16
ENSG00000241458	RPL7P19	3.0426	0.032932
ENSG00000232818	RPS2P32	3.0277	0.0465508
ENSG00000136881	BAAT	3.02654	7.85346e-05
ENSG00000198555		3.0245	0.0195854
ENSG00000261587	TMEM249	3.01916	0.0213948
ENSG00000139908	TSSK4	3.01696	0.0240283
ENSG00000234509		3.01503	0.0252397
ENSG00000176868		3.00846	0.000398559
ENSG00000189334	S100A14	3.00749	0.00593927
ENSG00000225945		3.00382	0.0286369
ENSG00000279086		2.954	0.000146157
ENSG00000273472		2.9444	0.011381
ENSG00000227431	CSE1L-AS1	2.91719	0.00581198
ENSG00000181016	LSMEM1	2.90593	1.199e-09
ENSG00000182896	TMEM95	2.89596	0.000272956
ENSG00000262223		2.88453	0.00168499
ENSG00000280278		2.88091	0.00425047
ENSG00000274963	RN7SL600P	2.87025	0.000479327
ENSG00000256603		2.85055	0.0061009
ENSG00000143199	ADCY10	2.84532	0.0127591
ENSG00000151689	INPP1	2.83956	0.0445899
ENSG00000286996		2.82357	1.28221e-05
ENSG00000135625	EGR4	2.81498	5.86209e-10
ENSG00000222009	BTBD19	2.79344	1.01624e-09
ENSG00000007944	MYLIP	2.78399	6.22442e-07
ENSG00000200164		2.7647	0.0478811
ENSG00000172936	MYD88	2.72426	4.66872e-05
ENSG00000225578	NCBP2-AS1	2.72128	0.00535462
ENSG00000266680		2.69054	9.58582e-08
ENSG00000213937	CLDN9	2.68586	0.04488
ENSG00000120129	DUSP1	2.66558	1.08512e-53
ENSG00000108551	RASD1	2.65316	0.0157097
ENSG00000274270		2.65214	3.52516e-07
ENSG00000226803	ZNF451-AS1	2.6348	0.0101905
ENSG00000262953	EIF4A1P9	2.63468	0.0334664
ENSG00000260714		2.63207	0.012183
ENSG00000286113		2.6108	0.00395996
ENSG00000188993	LRRC66	2.60317	0.000492279
ENSG00000267898		2.59543	0.00287717
ENSG00000241735	FABP5P3	2.58438	0.00882415
ENSG00000279070		2.58205	1.14714e-05
ENSG00000287296		2.57961	0.0494721
ENSG00000285641		2.55297	0.00567916
ENSG00000237781	ADAMTSL4-AS2	2.54735	0.000213125
ENSG00000188051	TMEM221	2.5401	0.0404807
ENSG00000167588	GPD1	2.53898	0.00380677
ENSG00000188825	LINC00910	2.53116	2.3807e-05
ENSG00000287170		2.52732	0.00205442
ENSG00000272092		2.51458	3.36488e-05
ENSG00000254207		2.50037	0.00798555
ENSG00000163576	EFHB	2.49721	0.038126
ENSG00000273335		2.48554	0.0476382
ENSG00000261829		2.48205	0.0304523
ENSG00000240457	RN7SL472P	2.48071	8.34177e-05
ENSG00000283514	MIR3975	2.47895	0.0499984
ENSG00000269855	RNF225	2.45822	0.00193027
ENSG00000240038	AMY2B	2.45719	0.00524213
ENSG00000177576	C18orf32	2.44572	1.35522e-35
ENSG00000270813	NANOGNBP3	2.44303	0.00220285
ENSG00000175820	CCDC168	2.4198	1.75472e-12
ENSG00000111679	PTPN6	2.40455	1.09003e-10
ENSG00000070388	FGF22	2.39688	0.0175286
ENSG00000207605	MIR191	2.39084	0.020895
ENSG00000233493	TMEM238	2.38984	0.0318072
ENSG00000131471	AOC3	2.37509	1.68364e-09
ENSG00000273554		2.36456	2.347e-06
ENSG00000177238	TRIM72	2.36125	0.0157763
ENSG00000223356		2.3612	0.0111626
ENSG00000287192		2.35758	0.0075059
ENSG00000286626		2.35318	0.00106114
ENSG00000251682		2.32108	0.00444247
ENSG00000130066	SAT1	2.32081	8.64636e-34
ENSG00000185668	POU3F1	2.31914	0.0203446
ENSG00000268375		2.30971	0.00941805
ENSG00000162461	SLC25A34	2.30931	0.0149439
ENSG00000228423		2.3049	0.00846172
ENSG00000263756		2.30382	0.00788423
ENSG00000279277		2.30182	0.00282917
ENSG00000272512		2.29825	1.75062e-10
ENSG00000275329		2.2967	0.000887255
ENSG00000164949	GEM	2.29664	0.0253521
ENSG00000163701	IL17RE	2.27057	0.0201906
ENSG00000130518	IQCN	2.26373	3.47188e-12
ENSG00000147883	CDKN2B	2.25178	0.000174997
ENSG00000234432		2.23295	5.10451e-11
ENSG00000089692	LAG3	2.2204	1.3467e-09
ENSG00000143107	FNDC7	2.21556	0.0172845
ENSG00000283078		2.21448	5.14418e-10
ENSG00000160973	FOXH1	2.21129	0.000916568
ENSG00000286207		2.20817	1.93825e-06
ENSG00000162772	ATF3	2.20335	6.21415e-70
ENSG00000273056		2.20198	0.0170141
ENSG00000232536		2.19636	0.000267063
ENSG00000266473		2.19419	0.00952106
ENSG00000252947	SCARNA1	2.18414	0.0276421
ENSG00000267598		2.16954	4.85132e-09
ENSG00000172602	RND1	2.16848	5.54471e-06
ENSG00000274015		2.16514	0.0194079
ENSG00000285856		2.16256	0.0210426
ENSG00000261101		2.15481	0.0116241
ENSG00000244945		2.14542	0.000135153
ENSG00000270441		2.14391	0.00161046
ENSG00000260806		2.13369	3.50328e-07
ENSG00000105523	FAM83E	2.13254	3.31047e-06
ENSG00000286445		2.13161	0.0166351
ENSG00000172382	PRSS27	2.1283	1.29562e-05
ENSG00000125740	FOSB	2.12696	1.01793e-44
ENSG00000231609		2.12673	0.0250703
ENSG00000239351	NPM1P29	2.12249	0.0452412
ENSG00000172771	EFCAB12	2.11638	0.000327715
ENSG00000275894		2.10997	0.0485427
ENSG00000153234	NR4A2	2.10762	7.78244e-13
ENSG00000229178		2.10509	0.0478747
ENSG00000257354		2.10261	1.18736e-19
ENSG00000231416		2.09456	2.66008e-05
ENSG00000264772		2.09198	0.0489103
ENSG00000198576	ARC	2.0809	2.0624e-40
ENSG00000254718		2.07877	0.0300052
ENSG00000239219		2.07779	0.0498365
ENSG00000180245	RRH	2.07675	3.74578e-05
ENSG00000273419		2.06926	0.0211875
ENSG00000133639	BTG1	2.06812	1.72048e-22
ENSG00000163273	NPPC	2.06469	5.96028e-07
ENSG00000004838	ZMYND10	2.06429	0.00126092
ENSG00000230832		2.06308	9.65916e-10
ENSG00000255236		2.04547	0.0359302
ENSG00000203804	ADAMTSL4-AS1	2.0433	2.14599e-16
ENSG00000274010	ZFP91P1	2.03219	3.11768e-05
ENSG00000275857		2.02983	0.0219496
ENSG00000221883	ARIH2OS	2.0168	3.9772e-05
ENSG00000110169	HPX	2.01217	0.0484876
ENSG00000121101	TEX14	2.00107	3.55641e-05
ENSG00000272717		1.9962	0.0463213
ENSG00000251279	SMIM15-AS1	1.99516	0.034556
ENSG00000273599		1.99296	0.00130216
ENSG00000143110	C1orf162	1.98949	0.000741437
ENSG00000254665		1.98794	3.09277e-06
ENSG00000231969	MMADHC-DT	1.98649	0.0164561
ENSG00000256690		1.98367	0.00242684
ENSG00000286116		1.98084	0.000761127
ENSG00000224420	ADM5	1.97132	2.69117e-06
ENSG00000187686	KRT18P59	1.96883	0.0228453
ENSG00000107831	FGF8	1.96758	0.0146582
ENSG00000237436	CAMTA1-DT	1.96579	0.0322543
ENSG00000158869	FCER1G	1.95718	0.00212854
ENSG00000263050		1.95183	0.0315539
ENSG00000276259		1.9495	0.0498085
ENSG00000280047		1.94314	0.0472725
ENSG00000241106	HLA-DOB	1.94011	0.0172195
ENSG00000173805	HAP1	1.93938	1.28694e-10
ENSG00000172183	ISG20	1.92511	5.33177e-05
ENSG00000136286	MYO1G	1.91965	0.00772679
ENSG00000246308		1.91782	0.0380858
ENSG00000273199		1.91374	0.000281413
ENSG00000199032	MIR425	1.91316	0.0361825
ENSG00000246792		1.9088	0.0316087
ENSG00000167874	TMEM88	1.90494	0.0409415
ENSG00000173846	PLK3	1.89729	1.48474e-42
ENSG00000226648	PLCG1-AS1	1.89337	0.0083663
ENSG00000258377		1.88994	0.00147862
ENSG00000275880		1.88553	0.0260734
ENSG00000179698	WDR97	1.88499	0.000198597
ENSG00000145632	PLK2	1.87356	7.12584e-100
ENSG00000279649		1.87247	0.00337467
ENSG00000235374	SSR4P1	1.87195	0.00111561
ENSG00000260278		1.86962	0.00769185
ENSG00000186364	NUDT17	1.85731	2.19116e-07
ENSG00000258099	ATXN2-AS	1.85413	0.00667809
ENSG00000266405		1.84854	0.000213946
ENSG00000086730	LAT2	1.84545	0.0360771
ENSG00000270638		1.8429	0.0115201
ENSG00000287104		1.84027	0.00111748
ENSG00000260948		1.83862	1.99885e-05
ENSG00000273456		1.83463	0.00185429
ENSG00000120738	EGR1	1.83246	4.12261e-185
ENSG00000204264	PSMB8	1.83187	0.00047378
ENSG00000227036	LINC00511	1.82701	0.0246093
ENSG00000173825	TIGD3	1.82502	0.000461054
ENSG00000113070	HBEGF	1.82101	3.14967e-19
ENSG00000228242		1.81638	0.0259459
ENSG00000187479	C11orf96	1.81104	0.00114733
ENSG00000258725	PRC1-AS1	1.81063	0.0208227
ENSG00000226314	ZNF192P1	1.80742	0.00119127
ENSG00000244578	LINC01391	1.80692	0.00270168
ENSG00000149634	SPATA25	1.79921	0.0274847
ENSG00000278156	TSC22D1-AS1	1.79809	0.00020506
ENSG00000261351		1.7942	3.02909e-06
ENSG00000279529		1.79054	3.96211e-07
ENSG00000184545	DUSP8	1.7817	0.00215995
ENSG00000287548		1.78117	0.0202919
ENSG00000147576	ADHFE1	1.77609	0.00520441
ENSG00000226763	SRRM5	1.77018	0.0196747
ENSG00000179388	EGR3	1.76947	6.21884e-36
ENSG00000164404	GDF9	1.76624	0.000172196
ENSG00000274904		1.76299	0.0130483
ENSG00000183479	TREX2	1.76285	0.0213795
ENSG00000265692	LINC01970	1.75471	0.00737092
ENSG00000264349	MIR4258	1.75128	0.0330622
ENSG00000087074	PPP1R15A	1.74796	2.83496e-55
ENSG00000112659	CUL9	1.74715	0.011377
ENSG00000009724	MASP2	1.74119	0.00461442
ENSG00000242028	HYPK	1.73989	5.62931e-10
ENSG00000286389		1.73855	0.0212698
ENSG00000272677		1.73563	0.00231952
ENSG00000170608	FOXA3	1.73518	0.0404281
ENSG00000286180		1.73192	0.0461069
ENSG00000287707		1.72812	1.35196e-08
ENSG00000164406	LEAP2	1.71972	6.03645e-10
ENSG00000115850	LCT	1.71893	0.0196169
ENSG00000261242		1.71331	0.0221475
ENSG00000259682		1.70764	0.0426397
ENSG00000282988		1.70676	4.5422e-05
ENSG00000259775		1.70234	0.0318521
ENSG00000131480	AOC2	1.70207	1.38506e-11
ENSG00000272081		1.69908	0.0222519
ENSG00000259780		1.68915	0.0187274
ENSG00000249492		1.68678	0.00394521
ENSG00000245498		1.6866	1.31087e-13
ENSG00000183508	TENT5C	1.68258	0.0120455
ENSG00000278000		1.6821	9.59274e-07
ENSG00000112245	PTP4A1	1.67852	0.00526286
ENSG00000221949	LINC01465	1.67482	0.00333555
ENSG00000137098	SPAG8	1.67436	0.0458654
ENSG00000214188	ST7-OT4	1.67187	0.000228001
ENSG00000286994		1.67002	0.000995135
ENSG00000254812		1.6667	0.0202746
ENSG00000141682	PMAIP1	1.66565	4.49345e-08
ENSG00000272768		1.66497	0.000208545
ENSG00000200792	SNORA80A	1.66041	0.0179432
ENSG00000258561		1.65804	0.0274925
ENSG00000260796		1.64627	0.0111364
ENSG00000225032		1.64438	0.0105509
ENSG00000279283		1.64119	0.00104415
ENSG00000234832	NXT1-AS1	1.63987	0.0421906
ENSG00000161509	GRIN2C	1.63695	8.77457e-08
ENSG00000236723		1.63009	0.0154154
ENSG00000122877	EGR2	1.63002	3.97468e-09
ENSG00000167034	NKX3-1	1.62647	0.000186835
ENSG00000265972	TXNIP	1.62017	2.65378e-05
ENSG00000241985	WWTR1-IT1	1.62013	0.0461069
ENSG00000164849	GPR146	1.6116	0.0192166
ENSG00000272702		1.61125	0.00196569
ENSG00000251359	WWC2-AS2	1.6106	4.56644e-05
ENSG00000238390		1.61029	0.0330349
ENSG00000261087	ZNNT1	1.60294	0.00276024
ENSG00000270332	SMC2-AS1	1.59939	0.0192776
ENSG00000232656	IDI2-AS1	1.58895	0.0147687
ENSG00000184068	SREBF2-AS1	1.58516	0.00626021
ENSG00000245750	DRAIC	1.57051	0.0294553
ENSG00000198917	SPOUT1	1.57022	0.0273485
ENSG00000229273		1.56848	0.021208
ENSG00000217527	RPS16P5	1.56723	0.0156574
ENSG00000173567	ADGRF3	1.56703	0.0447408
ENSG00000277767		1.56197	0.00721258
ENSG00000175906	ARL4D	1.56064	6.7225e-07
ENSG00000159885	ZNF222	1.5601	1.02471e-05
ENSG00000279608		1.55896	0.000211199
ENSG00000287737		1.55585	0.0112473
ENSG00000085465	OVGP1	1.554	0.000179126
ENSG00000267430		1.55224	0.00222306
ENSG00000185022	MAFF	1.55033	7.02359e-32
ENSG00000236514		1.54559	0.0224205
ENSG00000223947		1.54429	0.04875
ENSG00000057657	PRDM1	1.54398	0.0329266
ENSG00000280367		1.54262	0.00373219
ENSG00000136535	TBR1	1.54172	0.0380529
ENSG00000261616		1.53556	0.0246136
ENSG00000230454		1.53042	0.00457849
ENSG00000280184		1.52987	0.00212172
ENSG00000232860	SMG7-AS1	1.52952	0.000438518
ENSG00000229589	ACVR2B-AS1	1.52079	0.00951881
ENSG00000287601		1.51938	0.00960807
ENSG00000135407	AVIL	1.51553	0.00933962
ENSG00000231856		1.51405	0.000867752
ENSG00000278376		1.5135	0.000154435
ENSG00000143127	ITGA10	1.51153	0.0262937
ENSG00000139289	PHLDA1	1.5044	3.44034e-09
ENSG00000263916		1.50383	0.0480195
ENSG00000286230		1.50159	0.0186753
ENSG00000235090	RPL7L1P3	1.49773	0.00665795
ENSG00000273893		1.49569	0.00961959
ENSG00000276651		1.49294	0.0428611
ENSG00000273008		1.48724	0.00173496
ENSG00000258813		1.4843	0.0377013
ENSG00000204311	PJVK	1.48358	8.97899e-05
ENSG00000268798		1.48156	0.000757489
ENSG00000277879		1.48148	0.0478951
ENSG00000246145	RRS1-AS1	1.48018	0.0101149
ENSG00000279145		1.47769	5.07445e-06
ENSG00000262766		1.4773	0.00229863
ENSG00000213062		1.47512	1.26862e-06
ENSG00000277969		1.46719	0.00163575
ENSG00000286138		1.46411	2.7218e-06
ENSG00000232671	ZNF687-AS1	1.46286	0.00018276
ENSG00000182759	MAFA	1.45773	1.12654e-07
ENSG00000243970	PPIEL	1.45427	2.16863e-05
ENSG00000254884	PRR13P2	1.44395	0.0259151
ENSG00000287576		1.44388	0.00794367
ENSG00000261654		1.44159	0.00526699
ENSG00000287584		1.4411	0.00101403
ENSG00000248909	HMGB1P21	1.43729	0.0327896
ENSG00000149781	FERMT3	1.43259	0.00943735
ENSG00000262227		1.43183	0.0184433
ENSG00000236535	RC3H1-IT1	1.43066	0.0109374
ENSG00000268189		1.43062	0.0123574
ENSG00000236255		1.43051	7.807e-15
ENSG00000227896		1.42323	1.09044e-10
ENSG00000163141	BNIPL	1.42147	0.0202392
ENSG00000162510	MATN1	1.41731	0.0124838
ENSG00000275202		1.4131	0.000479086
ENSG00000287769		1.40897	0.00658297
ENSG00000117525	F3	1.40672	0.0124838
ENSG00000237753		1.39429	0.00513969
ENSG00000273084		1.39114	3.67401e-06
ENSG00000260063		1.38839	7.74762e-05
ENSG00000280194		1.3867	0.0426872
ENSG00000130513	GDF15	1.38284	6.98958e-27
ENSG00000157227	MMP14	1.38126	0.000742332
ENSG00000179743		1.37621	7.56992e-05
ENSG00000257433		1.37187	0.0348703
ENSG00000259818		1.37155	0.0162492
ENSG00000267270	PARD6G-AS1	1.36626	4.7917e-20
ENSG00000276791		1.36534	4.07001e-09
ENSG00000287553		1.36366	0.043071
ENSG00000235706	DICER1-AS1	1.36324	0.00417857
ENSG00000265100		1.36126	0.0139007
ENSG00000254473		1.36045	0.000377466
ENSG00000267607		1.36034	8.34169e-05
ENSG00000159388	BTG2	1.36016	2.23955e-63
ENSG00000215014		1.36005	0.000342184
ENSG00000144045	DQX1	1.35982	0.0100012
ENSG00000185522	LMNTD2	1.35461	0.00459321
ENSG00000185112	FAM43A	1.35379	1.16467e-17
ENSG00000146094	DOK3	1.35336	3.69999e-08
ENSG00000129757	CDKN1C	1.34954	0.00204556
ENSG00000272086		1.34687	0.00476467
ENSG00000104901	DKKL1	1.34623	0.0111165
ENSG00000272008		1.34575	0.0175929
ENSG00000126562	WNK4	1.34309	0.000232532
ENSG00000274292		1.34142	0.000950294
ENSG00000273391		1.3348	0.00842219
ENSG00000198003	CCDC151	1.32925	0.0186931
ENSG00000231784	DBIL5P	1.3239	0.00687831
ENSG00000125657	TNFSF9	1.32115	1.03376e-14
ENSG00000261341		1.32114	0.0289901
ENSG00000283828		1.31869	0.00606551
ENSG00000279901		1.31823	0.0125425
ENSG00000232611		1.31743	0.00339331
ENSG00000212607	SNORA3B	1.31629	0.00260967
ENSG00000273783		1.31577	0.0172195
ENSG00000259826		1.31566	0.00372668
ENSG00000256712		1.31405	0.0124701
ENSG00000237054	PRMT5-AS1	1.31397	0.0465074
ENSG00000260708		1.30652	2.98684e-05
ENSG00000259802		1.30634	0.00176975
ENSG00000246705	H2AJ	1.30408	5.53893e-19
ENSG00000270820		1.30362	0.00280596
ENSG00000155367	PPM1J	1.30157	0.0149421
ENSG00000261096		1.29857	0.0205685
ENSG00000280211		1.29686	0.0198635
ENSG00000196337	CGB7	1.29528	0.0472392
ENSG00000182511	FES	1.29396	0.0404175
ENSG00000273117		1.28278	0.0212047
ENSG00000232070	TMEM253	1.28164	0.0428536
ENSG00000115226	FNDC4	1.27536	0.0389912
ENSG00000103269	RHBDL1	1.27443	9.96827e-07
ENSG00000220201	ZGLP1	1.27385	0.0217779
ENSG00000285230	RALY-AS1	1.27342	5.773e-13
ENSG00000260774		1.27139	0.00721947
ENSG00000224424	PRKAR2A-AS1	1.27099	0.0192323
ENSG00000276071		1.26922	0.0220132
ENSG00000119508	NR4A3	1.26731	5.6258e-05
ENSG00000206633	SNORA80B	1.26604	0.00848777
ENSG00000246889		1.26329	0.000769308
ENSG00000267871	ZNF460-AS1	1.2628	0.0208262
ENSG00000240053	LY6G5B	1.25634	0.000301071
ENSG00000263884		1.25417	0.00130216
ENSG00000099860	GADD45B	1.25058	9.46525e-42
ENSG00000176428	VPS37D	1.24886	0.0098204
ENSG00000267796	LIN37	1.24819	0.00565532
ENSG00000186352	ANKRD37	1.24741	0.00661706
ENSG00000173334	TRIB1	1.24708	4.43219e-21
ENSG00000173110	HSPA6	1.23545	0.0103576
ENSG00000219200	RNASEK	1.23114	0.00696068
ENSG00000230747		1.22774	0.0423602
ENSG00000256092	SBNO1-AS1	1.22734	0.000603981
ENSG00000213694	S1PR3	1.22288	4.13983e-09
ENSG00000273702		1.2217	0.000771169
ENSG00000248015		1.22106	0.000155231
ENSG00000140961	OSGIN1	1.21915	0.000350357
ENSG00000164776	PHKG1	1.20805	0.0368069
ENSG00000250838		1.20744	0.0202919
ENSG00000279744		1.2035	0.0357987
ENSG00000277453		1.20015	0.0398353
ENSG00000104899	AMH	1.19942	2.63475e-06
ENSG00000182685	BRICD5	1.19918	0.000805019
ENSG00000186056	MATN1-AS1	1.19763	5.66433e-06
ENSG00000273015		1.19762	4.57074e-18
ENSG00000127528	KLF2	1.19691	5.21695e-10
ENSG00000261423	TMEM202-AS1	1.19663	0.002702
ENSG00000165046	LETM2	1.1948	0.000742332
ENSG00000213741	RPS29	1.19261	2.96243e-45
ENSG00000241370	RPP21	1.18917	0.0243172
ENSG00000275198		1.18889	0.0151947
ENSG00000285693		1.18877	0.00204689
ENSG00000279207		1.18723	9.02235e-14
ENSG00000276603		1.185	0.0404807
ENSG00000272899	ATP6V1FNB	1.18491	0.000902904
ENSG00000164082	GRM2	1.18039	0.0026396
ENSG00000241313	WWTR1-AS1	1.17725	0.0320726
ENSG00000260369		1.17701	0.016903
ENSG00000149564	ESAM	1.17607	0.0445223
ENSG00000113205	PCDHB3	1.17545	0.0306902
ENSG00000226029	LINC01772	1.17468	0.0403814
ENSG00000286482		1.17098	0.0148259
ENSG00000235701	PCBP2P1	1.16586	0.0295286
ENSG00000162783	IER5	1.16469	3.67918e-51
ENSG00000157514	TSC22D3	1.16367	2.71381e-18
ENSG00000169548	ZNF280A	1.16335	3.05829e-05
ENSG00000128016	ZFP36	1.16306	3.44234e-31
ENSG00000172748	ZNF596	1.16261	2.54904e-05
ENSG00000174365	SNHG11	1.16085	9.74267e-16
ENSG00000272447		1.15623	0.00576509
ENSG00000270175		1.15515	0.046454
ENSG00000184205	TSPYL2	1.15429	1.64395e-33
ENSG00000268996	MAN1B1-DT	1.15357	0.00483779
ENSG00000261324		1.15265	0.00259903
ENSG00000237310		1.15111	0.0418469
ENSG00000272476		1.15022	0.0382536
ENSG00000114315	HES1	1.14993	1.23346e-20
ENSG00000244055		1.13776	0.0245295
ENSG00000262049		1.13709	1.20559e-05
ENSG00000181029	TRAPPC5	1.1367	0.0027628
ENSG00000196724	ZNF418	1.1342	0.0276421
ENSG00000158050	DUSP2	1.13408	6.10867e-14
ENSG00000177374	HIC1	1.13289	1.08051e-13
ENSG00000242622		1.13287	8.14601e-05
ENSG00000260339	HEXA-AS1	1.13183	0.0165791
ENSG00000163874	ZC3H12A	1.13078	1.37746e-08
ENSG00000259462	CPEB1-AS1	1.12491	0.0486921
ENSG00000257815	PRANCR	1.12361	0.00189093
ENSG00000104140	RHOV	1.123	0.000385876
ENSG00000249850	KRT18P31	1.12134	0.000981429
ENSG00000136114	THSD1	1.12033	0.0372131
ENSG00000151006	PRSS53	1.11777	0.012843
ENSG00000224281	SLC25A5-AS1	1.11635	0.0404175
ENSG00000122035	RASL11A	1.11598	3.77275e-06
ENSG00000269720	CCDC194	1.11434	0.03534
ENSG00000143450	OAZ3	1.10188	0.0137352
ENSG00000251151	HOXC-AS3	1.09827	0.0222814
ENSG00000160207	HSF2BP	1.09813	0.0291059
ENSG00000072818	ACAP1	1.09401	0.0461479
ENSG00000258738		1.09163	4.33516e-05
ENSG00000111641	NOP2	1.09111	0.00074715
ENSG00000287966		1.08925	0.0157653
ENSG00000203875	SNHG5	1.087	1.82537e-59
ENSG00000257557	PPP1R12A-AS1	1.08544	0.0165405
ENSG00000261758		1.0849	0.00347213
ENSG00000172830	SSH3	1.08363	0.011953
ENSG00000170684	ZNF296	1.08289	2.94907e-09
ENSG00000128917	DLL4	1.08235	0.00944235
ENSG00000181773	GPR3	1.08106	2.35795e-10
ENSG00000184702	SEPTIN5	1.08093	0.0198966
ENSG00000111012	CYP27B1	1.08077	3.90314e-07
ENSG00000143878	RHOB	1.07665	4.13877e-47
ENSG00000170296	GABARAP	1.07529	0.000577801
ENSG00000274565		1.07443	0.010335
ENSG00000154040	CABYR	1.06999	0.0034671
ENSG00000204055		1.06833	0.0438494
ENSG00000092295	TGM1	1.06779	0.0182537
ENSG00000224687	RASAL2-AS1	1.06707	0.00758244
ENSG00000285728		1.06378	0.0274687
ENSG00000186594	MIR22HG	1.0631	9.47232e-12
ENSG00000213139	CRYGS	1.06193	0.0119868
ENSG00000197019	SERTAD1	1.06025	2.10653e-25
ENSG00000261716	H2BC20P	1.05374	7.27607e-18
ENSG00000230359	TPI1P2	1.05134	0.0073783
ENSG00000260000		1.04351	0.0399059
ENSG00000152433	ZNF547	1.04241	0.0140706
ENSG00000143387	CTSK	1.04206	0.0068049
ENSG00000247950	SEC24B-AS1	1.04082	0.0227028
ENSG00000261884		1.04046	0.000239838
ENSG00000272631		1.03925	8.92386e-08
ENSG00000270177		1.03811	0.0293807
ENSG00000105327	BBC3	1.03549	3.35581e-12
ENSG00000279602		1.033	1.43387e-05
ENSG00000235453	SMIM27	1.02916	0.015379
ENSG00000255568	BRWD1-AS2	1.02643	0.0490949
ENSG00000263412		1.02575	0.000617259
ENSG00000214617	SLC6A10P	1.02271	0.0225659
ENSG00000260727	SLC7A5P1	1.02004	0.000590018
ENSG00000168811	IL12A	1.01442	0.0236102
ENSG00000256806	C17orf100	1.01386	0.00248636
ENSG00000224152		1.01244	0.000137855
ENSG00000235919	ASH1L-AS1	1.00955	0.00139778
ENSG00000161960	EIF4A1	1.0095	5.23373e-11
ENSG00000280143		1.00921	0.0263091
ENSG00000270069	MIR222HG	1.00806	0.00691703
ENSG00000113916	BCL6	1.0035	2.61519e-08
ENSG00000175592	FOSL1	1.0019	4.72002e-05

## Sheet: Table 2
Table 2. Upregulated genes in Acis following cisplatin
gene	gene_name	log2FC	padj
ENSG00000286996		3.34075	0.000962452
ENSG00000272103		2.98826	0.000100451
ENSG00000181016	LSMEM1	2.92259	4.33687e-07
ENSG00000275329		2.87809	0.0296884
ENSG00000126803	HSPA2	2.73865	0.000331705
ENSG00000139289	PHLDA1	2.68796	6.4246e-13
ENSG00000286379		2.62395	0.0336587
ENSG00000257354		2.58293	3.71344e-19
ENSG00000172602	RND1	2.56146	0.00168611
ENSG00000234502	FYTTD1P1	2.48009	0.014038
ENSG00000266680		2.4798	0.00582469
ENSG00000261087	ZNNT1	2.45641	8.09964e-05
ENSG00000270441		2.40231	0.0479699
ENSG00000274963	RN7SL600P	2.36197	0.0193058
ENSG00000287275		2.31558	0.0220866
ENSG00000222009	BTBD19	2.31039	0.000469841
ENSG00000272606		2.30033	0.0301482
ENSG00000136881	BAAT	2.27926	0.00283053
ENSG00000279649		2.26058	0.0132593
ENSG00000267598		2.23919	2.01433e-05
ENSG00000188825	LINC00910	2.20005	0.00624053
ENSG00000268583		2.17393	0.0329631
ENSG00000232611		2.03644	2.38948e-06
ENSG00000234473	ZNF101P2	2.01069	0.00535053
ENSG00000274114	ALOX15P1	2.00364	0.0135097
ENSG00000158869	FCER1G	1.98792	0.0280686
ENSG00000273599		1.98339	0.0318878
ENSG00000180245	RRH	1.97373	0.00313673
ENSG00000176868		1.96472	0.0170929
ENSG00000187815	ZFP69	1.93194	0.00720633
ENSG00000280184		1.87965	0.00164907
ENSG00000261359	PYCARD-AS1	1.85092	0.0279757
ENSG00000173559	NABP1	1.84212	0.0130955
ENSG00000170345	FOS	1.84064	7.94879e-41
ENSG00000279744		1.81511	0.00742097
ENSG00000226849		1.8134	0.0420885
ENSG00000246145	RRS1-AS1	1.78389	0.0144366
ENSG00000272512		1.77608	9.10491e-06
ENSG00000229321		1.76771	0.00959972
ENSG00000185338	SOCS1	1.75866	0.00599623
ENSG00000257815	PRANCR	1.75514	0.00129913
ENSG00000257702	LBX2-AS1	1.72375	0.0173755
ENSG00000263916		1.699	0.047785
ENSG00000203721	LINC00862	1.68677	0.0464313
ENSG00000236255		1.68002	4.06693e-15
ENSG00000147174	GCNA	1.67858	0.00806884
ENSG00000247950	SEC24B-AS1	1.64313	0.00878692
ENSG00000113205	PCDHB3	1.62456	0.00447261
ENSG00000261026		1.60397	0.0025514
ENSG00000235217	TSPY26P	1.58318	0.0307325
ENSG00000279145		1.56118	0.000105277
ENSG00000175820	CCDC168	1.54751	0.000139727
ENSG00000117477	CCDC181	1.54742	0.0281174
ENSG00000177576	C18orf32	1.54375	1.14288e-12
ENSG00000226314	ZNF192P1	1.53817	0.0493145
ENSG00000182223	ZAR1	1.53798	0.0396998
ENSG00000130518	IQCN	1.52084	0.00559171
ENSG00000144802	NFKBIZ	1.51354	2.7715e-20
ENSG00000235090	RPL7L1P3	1.47908	0.0329348
ENSG00000281731	METTL14-DT	1.47467	0.0484759
ENSG00000214188	ST7-OT4	1.45776	0.00394492
ENSG00000270362	HMGN3-AS1	1.4271	0.0223786
ENSG00000286207		1.42622	0.0152524
ENSG00000235701	PCBP2P1	1.42354	0.0142961
ENSG00000183307	TMEM121B	1.41183	0.000409855
ENSG00000163449	TMEM169	1.40096	0.0340156
ENSG00000131471	AOC3	1.39944	0.00909909
ENSG00000235529	AGAP1-IT1	1.37966	0.0274839
ENSG00000182700	IGIP	1.36408	0.0182436
ENSG00000148926	ADM	1.36219	2.85867e-09
ENSG00000254665		1.35785	0.004574
ENSG00000182308	DCAF4L1	1.35129	0.0443693
ENSG00000228889	UBAC2-AS1	1.34708	0.0284581
ENSG00000135625	EGR4	1.34225	0.0168489
ENSG00000261020		1.33301	0.0157629
ENSG00000249459	ZNF286B	1.3127	0.000513618
ENSG00000173295	FAM86B3P	1.30499	0.0340418
ENSG00000196391	ZNF774	1.30324	0.037839
ENSG00000173846	PLK3	1.29866	3.20096e-19
ENSG00000204947	ZNF425	1.26842	4.3992e-07
ENSG00000244055		1.25262	0.0170671
ENSG00000125462	C1orf61	1.25131	0.00681219
ENSG00000147437	GNRH1	1.24203	0.00998884
ENSG00000125740	FOSB	1.2351	9.92438e-12
ENSG00000203804	ADAMTSL4-AS1	1.23362	5.4676e-05
ENSG00000279265		1.21774	0.0443275
ENSG00000103269	RHBDL1	1.191	0.000211746
ENSG00000143387	CTSK	1.19099	0.00641873
ENSG00000256667	KLRA1P	1.1716	0.00358144
ENSG00000230658	KLHL7-DT	1.16274	0.0455121
ENSG00000273015		1.16098	2.15505e-12
ENSG00000168000	BSCL2	1.15817	0.000781597
ENSG00000125657	TNFSF9	1.15688	5.59831e-12
ENSG00000159388	BTG2	1.14642	5.79061e-33
ENSG00000175906	ARL4D	1.14616	0.0104752
ENSG00000143369	ECM1	1.14396	0.0106961
ENSG00000177606	JUN	1.13395	1.16842e-07
ENSG00000245573	BDNF-AS	1.12879	0.0449128
ENSG00000265401		1.12111	0.0340922
ENSG00000133639	BTG1	1.11837	5.8279e-05
ENSG00000124216	SNAI1	1.11475	5.52062e-08
ENSG00000227896		1.11117	3.32766e-05
ENSG00000279873	LINC01126	1.11094	0.0129347
ENSG00000182685	BRICD5	1.09699	0.0148375
ENSG00000271918		1.09456	0.0128716
ENSG00000168140	VASN	1.07504	0.000286941
ENSG00000224687	RASAL2-AS1	1.06269	0.0418349
ENSG00000215067	ALOX12-AS1	1.05899	0.000340655
ENSG00000257446	ZNF878	1.05732	0.0140093
ENSG00000261351		1.04785	0.0464313
ENSG00000273038		1.0455	0.0122763
ENSG00000272983		1.03542	0.0128311
ENSG00000186567	CEACAM19	1.03216	0.000280967
ENSG00000162772	ATF3	1.02157	0.00237285
ENSG00000280138		1.0164	6.73478e-07
ENSG00000285967	NIPBL-DT	1.01078	3.13338e-10
ENSG00000277969		1.01019	0.0357747
ENSG00000266965		1.00884	0.0451213

## Sheet: Table 3
Table 3. Downregulated genes in A2780 following cisplatin
gene	gene_name	log2FC	padj
ENSG00000279294		-5.07539	0.00163986
ENSG00000243173	RN7SL861P	-5.03489	0.00277065
ENSG00000279589		-4.96081	0.00340848
ENSG00000259921		-4.9221	0.00196247
ENSG00000280543	ASAP1-IT2	-4.89476	0.00120812
ENSG00000228808	HMGB3P4	-4.87685	0.00758244
ENSG00000254681	PKD1P5	-4.83615	0.00417857
ENSG00000200742		-4.63014	0.00886759
ENSG00000093100		-4.5824	0.0102518
ENSG00000279573		-4.48866	0.0103113
ENSG00000275839		-4.48301	0.017969
ENSG00000265625		-4.47901	0.00369538
ENSG00000199331		-4.3538	0.0179954
ENSG00000248521		-4.19514	0.0274618
ENSG00000207034		-4.09641	0.0225319
ENSG00000279103		-4.08075	0.0413148
ENSG00000277840		-4.06083	0.0297722
ENSG00000226318	RPS3AP38	-4.0318	0.0141429
ENSG00000244314	RN7SL36P	-3.9027	0.0478951
ENSG00000214773		-3.79581	0.00129849
ENSG00000286205		-3.73951	0.0429139
ENSG00000279786		-3.54797	0.00154689
ENSG00000280432		-3.52428	0.0372696
ENSG00000277130		-3.36067	0.0373151
ENSG00000212128	TAS2R13	-3.3185	0.00696068
ENSG00000253558		-3.28942	0.037331
ENSG00000280434		-3.26962	5.59824e-12
ENSG00000236047	RPL13AP12	-3.22039	0.0414908
ENSG00000279880		-3.21491	0.0118514
ENSG00000272417		-3.11374	0.0491103
ENSG00000058673	ZC3H11A	-3.00464	0.00164012
ENSG00000279841		-2.97136	0.0204227
ENSG00000280036		-2.94317	0.00899007
ENSG00000272033		-2.88956	0.000861933
ENSG00000275029	HMGB1P24	-2.85152	0.00381198
ENSG00000229677		-2.70533	0.0165193
ENSG00000241975	ELOCP19	-2.69674	0.0350781
ENSG00000280332		-2.69021	0.0014434
ENSG00000225447	RPS15AP10	-2.67285	0.0278484
ENSG00000286634		-2.66482	0.0101435
ENSG00000261056		-2.5967	0.000829565
ENSG00000180178	FAR2P1	-2.57726	8.18779e-05
ENSG00000262514		-2.56894	0.0121299
ENSG00000255423	EBLN2	-2.56476	6.091e-08
ENSG00000274308		-2.56113	0.0295198
ENSG00000255710		-2.55443	0.0435405
ENSG00000278864		-2.51534	1.08729e-06
ENSG00000271141		-2.51524	0.00896907
ENSG00000276410	H2BC3	-2.51049	0.00058754
ENSG00000254985	RSF1-IT2	-2.50583	0.0457383
ENSG00000229692	SOS1-IT1	-2.49135	4.01301e-07
ENSG00000255300	LINC02745	-2.4862	0.00577171
ENSG00000276517		-2.39781	1.19883e-05
ENSG00000265750		-2.28136	0.0155253
ENSG00000282864		-2.24907	0.032648
ENSG00000243260	RN7SL558P	-2.24858	0.0437669
ENSG00000274093		-2.22485	0.0217319
ENSG00000197816	CCDC180	-2.22112	0.0355734
ENSG00000277687		-2.2035	0.0235546
ENSG00000279544		-2.18273	0.00492137
ENSG00000259644		-2.13738	0.0229699
ENSG00000263276		-2.12776	0.0400405
ENSG00000276115		-2.11501	0.0461339
ENSG00000259767		-2.10471	0.0465294
ENSG00000263968	RN7SL381P	-2.09333	0.0258717
ENSG00000279591		-2.09257	0.00288616
ENSG00000261529		-2.07835	0.0196025
ENSG00000284770	TBCE	-2.05112	1.93356e-13
ENSG00000272293		-2.03893	0.0416282
ENSG00000277945		-2.02971	1.35001e-05
ENSG00000266934		-2.01816	0.000140581
ENSG00000231181		-1.99451	0.0196249
ENSG00000254996	ANKHD1-EIF4EBP3	-1.9543	0.00150855
ENSG00000229447		-1.94788	0.0406617
ENSG00000249661	TNRC18P1	-1.94778	0.0298735
ENSG00000261326	LINC01355	-1.92752	2.95879e-13
ENSG00000281195		-1.92307	3.24503e-10
ENSG00000228446	ANKRD49P1	-1.92009	0.0153644
ENSG00000221995	TIAF1	-1.90241	0.0273453
ENSG00000272945		-1.88992	0.00873118
ENSG00000279801		-1.88386	0.0338775
ENSG00000279233		-1.87344	0.000344209
ENSG00000163635	ATXN7	-1.84884	9.67669e-10
ENSG00000277151		-1.84469	0.0052983
ENSG00000143341	HMCN1	-1.83231	0.0189782
ENSG00000259939		-1.83161	0.0190299
ENSG00000283563		-1.81599	2.8489e-08
ENSG00000119139	TJP2	-1.80476	0.0210133
ENSG00000284946		-1.77487	1.19871e-09
ENSG00000226380		-1.77128	1.18903e-11
ENSG00000279078	SND1-IT1	-1.76555	0.00143295
ENSG00000120049	KCNIP2	-1.76445	0.0008862
ENSG00000281183	NPTN-IT1	-1.75754	3.97794e-08
ENSG00000214428	NPM1P10	-1.74212	0.0276421
ENSG00000134532	SOX5	-1.69224	0.00748531
ENSG00000258904		-1.68395	0.0179954
ENSG00000272219		-1.66537	0.0485441
ENSG00000267632		-1.63323	0.018921
ENSG00000225813		-1.61613	8.07795e-05
ENSG00000279175		-1.61159	0.00130137
ENSG00000256436	TAS2R31	-1.60851	0.00393076
ENSG00000213073		-1.60582	0.0245956
ENSG00000225092		-1.59428	0.0270097
ENSG00000156103	MMP16	-1.5781	3.70473e-10
ENSG00000104728	ARHGEF10	-1.5596	4.64405e-05
ENSG00000212125	TAS2R15P	-1.52504	0.00467243
ENSG00000276564		-1.51976	0.0303152
ENSG00000239763		-1.48468	0.00176701
ENSG00000237877	LINC01473	-1.47076	0.00877099
ENSG00000279133		-1.46025	3.87669e-12
ENSG00000279432		-1.45492	0.000145567
ENSG00000232545		-1.4505	0.0441704
ENSG00000257607		-1.4496	0.0469833
ENSG00000261098		-1.44172	0.00129394
ENSG00000278861		-1.43919	0.0467626
ENSG00000259287		-1.4382	0.0403095
ENSG00000182389	CACNB4	-1.43609	0.000764105
ENSG00000124575	H1-3	-1.42567	2.95378e-34
ENSG00000256274	TAS2R64P	-1.41886	0.00789726
ENSG00000279765		-1.41684	5.93755e-05
ENSG00000286681		-1.41639	0.0102938
ENSG00000273373		-1.39951	2.34402e-06
ENSG00000196159	FAT4	-1.39445	0.00440433
ENSG00000256341		-1.39308	0.0463982
ENSG00000255837	TAS2R20	-1.38316	0.0274847
ENSG00000121210	TMEM131L	-1.37863	1.77071e-32
ENSG00000206828	RNVU1-30	-1.37789	0.0439642
ENSG00000287616		-1.35786	2.41338e-08
ENSG00000272374		-1.35578	0.0018977
ENSG00000137642	SORL1	-1.3545	6.48682e-05
ENSG00000154309	DISP1	-1.33894	0.0127059
ENSG00000261655		-1.32821	0.0320621
ENSG00000230896		-1.32331	0.0442389
ENSG00000230551		-1.32295	2.44418e-11
ENSG00000230701	FBXW4P1	-1.31813	0.00110487
ENSG00000136895	GARNL3	-1.31605	3.47282e-10
ENSG00000239415		-1.31152	0.0488297
ENSG00000183775	KCTD16	-1.3043	1.71819e-06
ENSG00000226683	PWWP2AP1	-1.29647	0.0275097
ENSG00000253966		-1.29568	0.025867
ENSG00000166689	PLEKHA7	-1.29362	0.00689935
ENSG00000279089		-1.28955	0.00321537
ENSG00000030419	IKZF2	-1.27771	4.34388e-06
ENSG00000260417		-1.27423	0.0315872
ENSG00000248228	SLIT2-IT1	-1.27351	0.0246352
ENSG00000158987	RAPGEF6	-1.24955	1.07398e-08
ENSG00000274422		-1.23851	0.00019477
ENSG00000230715		-1.22766	0.0353503
ENSG00000144426	NBEAL1	-1.22529	3.68274e-23
ENSG00000225213		-1.21799	0.00201182
ENSG00000154162	CDH12	-1.21572	0.0057485
ENSG00000281468		-1.20247	0.0162736
ENSG00000279347		-1.20056	0.026456
ENSG00000197168	NEK5	-1.20038	0.0219138
ENSG00000286058		-1.19793	0.0139218
ENSG00000178662	CSRNP3	-1.19171	4.21243e-15
ENSG00000185070	FLRT2	-1.19004	0.0394565
ENSG00000236671	PRKG1-AS1	-1.18651	0.0385639
ENSG00000205269	TMEM170B	-1.16441	0.0415432
ENSG00000275221	H2AC15	-1.16199	7.86936e-08
ENSG00000135905	DOCK10	-1.15709	0.0315976
ENSG00000261799		-1.145	8.05737e-05
ENSG00000102595	UGGT2	-1.14079	3.84735e-24
ENSG00000169239	CA5B	-1.13687	0.0158299
ENSG00000276903	H2AC16	-1.13403	2.43024e-10
ENSG00000113361	CDH6	-1.12699	0.0147231
ENSG00000156140	ADAMTS3	-1.12217	2.13379e-26
ENSG00000225472		-1.11803	0.0087003
ENSG00000271533		-1.11597	0.000109682
ENSG00000213659	RSU1P3	-1.11037	0.0323857
ENSG00000038427	VCAN	-1.1075	6.5498e-52
ENSG00000285077	ARHGAP11B	-1.10487	0.00220135
ENSG00000046604	DSG2	-1.10394	0.0131701
ENSG00000118997	DNAH7	-1.10393	0.0459935
ENSG00000134765	DSC1	-1.10122	0.00182274
ENSG00000276180	H4C9	-1.09453	6.6827e-08
ENSG00000163694	RBM47	-1.0927	0.000305708
ENSG00000049618	ARID1B	-1.09192	7.01928e-30
ENSG00000279738		-1.09057	2.33843e-09
ENSG00000197182	MIRLET7BHG	-1.08727	0.00483987
ENSG00000150893	FREM2	-1.08225	2.33021e-30
ENSG00000271425	NBPF10	-1.08179	0.0241865
ENSG00000050030	NEXMIF	-1.08128	3.35891e-21
ENSG00000154822	PLCL2	-1.07917	4.69919e-10
ENSG00000278576		-1.07868	0.00396259
ENSG00000279948		-1.07752	0.0152729
ENSG00000203709	MIR29B2CHG	-1.0746	8.00444e-05
ENSG00000139292	LGR5	-1.07045	0.00033149
ENSG00000111860	CEP85L	-1.06576	1.7593e-06
ENSG00000158966	CACHD1	-1.06555	0.00428155
ENSG00000129003	VPS13C	-1.06426	1.11266e-38
ENSG00000229358	DPY19L1P1	-1.06418	0.00521256
ENSG00000077943	ITGA8	-1.06329	1.95867e-05
ENSG00000033122	LRRC7	-1.06229	0.00348097
ENSG00000069188	SDK2	-1.06089	0.0032248
ENSG00000164180	TMEM161B	-1.05393	4.72628e-12
ENSG00000139973	SYT16	-1.05223	0.0295286
ENSG00000197442	MAP3K5	-1.05089	0.000122029
ENSG00000153132	CLGN	-1.04986	0.00074715
ENSG00000129993	CBFA2T3	-1.04661	0.0399507
ENSG00000165521	EML5	-1.04434	0.0488297
ENSG00000102290	PCDH11X	-1.04241	4.35439e-08
ENSG00000126705	AHDC1	-1.03973	2.88713e-22
ENSG00000107554	DNMBP	-1.03813	6.73989e-14
ENSG00000233215	LINC01687	-1.03756	0.0373914
ENSG00000111799	COL12A1	-1.03631	5.13149e-08
ENSG00000244625	MIATNB	-1.03405	0.00511069
ENSG00000229152	ANKRD10-IT1	-1.02873	0.00531255
ENSG00000173611	SCAI	-1.02844	6.53019e-11
ENSG00000154265	ABCA5	-1.02757	1.33808e-06
ENSG00000271270	TMCC1-AS1	-1.02733	9.97956e-14
ENSG00000136546	SCN7A	-1.02617	4.66885e-07
ENSG00000115525	ST3GAL5	-1.0231	0.0209843
ENSG00000149177	PTPRJ	-1.02224	3.69318e-19
ENSG00000271277		-1.02205	0.0204756
ENSG00000102780	DGKH	-1.01718	9.04371e-41
ENSG00000101384	JAG1	-1.01456	1.30994e-12
ENSG00000073910	FRY	-1.01084	7.38172e-05
ENSG00000087301	TXNDC16	-1.00987	4.92231e-07
ENSG00000149596	JPH2	-1.00896	0.0118354
ENSG00000144362	PHOSPHO2	-1.00895	0.039406
ENSG00000260400		-1.00666	0.0158156
ENSG00000054654	SYNE2	-1.00281	1.45495e-50
ENSG00000064393	HIPK2	-1.00192	3.38427e-09

## Sheet: Table 4
Table 4. Downregulated genes in Acis following cisplatin
gene	gene_name	log2FC	padj
ENSG00000206828	RNVU1-30	-2.23427	0.01315
ENSG00000279786		-2.21769	0.00264234
ENSG00000266934		-2.17811	0.0117386
ENSG00000265625		-2.15481	0.000344791
ENSG00000199879	RNVU1-22	-2.12056	0.0433719
ENSG00000274428	RNVU1-25	-1.93049	0.00587122
ENSG00000287190		-1.90294	0.00872563
ENSG00000283563		-1.87873	2.56887e-09
ENSG00000276216		-1.72519	0.00326701
ENSG00000207205	RNVU1-15	-1.71881	0.00383869
ENSG00000286172	RNVU1-8	-1.6539	0.0431558
ENSG00000124575	H1-3	-1.62749	1.04333e-39
ENSG00000280434		-1.60822	0.000177691
ENSG00000226216	RPS12P5	-1.57093	0.0300648
ENSG00000270022		-1.56116	0.000156438
ENSG00000246859	STARD4-AS1	-1.49389	0.0301984
ENSG00000276517		-1.45393	0.00022959
ENSG00000276903	H2AC16	-1.42877	9.26414e-14
ENSG00000275379	H3C11	-1.41956	7.45733e-17
ENSG00000278864		-1.3459	0.00545639
ENSG00000148200	NR6A1	-1.3314	3.1086e-22
ENSG00000279175		-1.31762	0.0203946
ENSG00000275714	H3C1	-1.31426	3.75861e-08
ENSG00000279078	SND1-IT1	-1.25504	0.0336587
ENSG00000276180	H4C9	-1.20064	4.4947e-09
ENSG00000255423	EBLN2	-1.19854	0.00980117
ENSG00000273983	H3C8	-1.18722	9.32596e-14
ENSG00000178568	ERBB4	-1.18388	0.0215439
ENSG00000285646		-1.16874	5.6147e-05
ENSG00000049618	ARID1B	-1.16736	2.49241e-31
ENSG00000213659	RSU1P3	-1.14702	0.028136
ENSG00000212195		-1.1374	0.0466962
ENSG00000275221	H2AC15	-1.07729	6.81155e-07
ENSG00000225213		-1.05797	0.00255305
ENSG00000033327	GAB2	-1.04083	0.00173294
ENSG00000226380		-1.01195	1.33029e-06
ENSG00000287978		-1.00889	0.0462634
ENSG00000126705	AHDC1	-1.00661	4.95378e-19
ENSG00000270629	NBPF14	-1.00394	0.042605

## Sheet: Table 5
Table 5. Upregulated genes in Acis compared to A2780 (untreated)
gene	gene_name	log2FC	padj
ENSG00000287853		11.0432	2.04559e-19
ENSG00000135218	CD36	10.791	1.33492e-18
ENSG00000107438	PDLIM1	10.4	3.05908e-17
ENSG00000122641	INHBA	10.146	2.25456e-32
ENSG00000142611	PRDM16	9.95621	9.48543e-16
ENSG00000154122	ANKH	9.8967	1.31467e-15
ENSG00000152495	CAMK4	9.77133	2.55373e-15
ENSG00000184672	RALYL	9.65902	5.53074e-15
ENSG00000158089	GALNT14	9.58284	1.77479e-19
ENSG00000131196	NFATC1	9.44318	6.75929e-19
ENSG00000215612	HMX1	9.4344	3.49103e-14
ENSG00000233338	TLR8-AS1	9.28444	1.13781e-13
ENSG00000137727	ARHGAP20	9.19385	2.07515e-13
ENSG00000020633	RUNX3	9.16083	2.71201e-26
ENSG00000239268		9.15913	2.58069e-13
ENSG00000171551	ECEL1	9.12989	2.75696e-13
ENSG00000233608	TWIST2	9.11607	3.21758e-13
ENSG00000185274	GALNT17	9.02154	6.0275e-13
ENSG00000112378	PERP	8.91823	7.11896e-17
ENSG00000243444	NA	8.8254	3.06389e-12
ENSG00000136535	TBR1	8.77452	1.55863e-63
ENSG00000187164	SHTN1	8.65716	6.64267e-16
ENSG00000182240	BACE2	8.54733	5.98237e-23
ENSG00000110328	GALNT18	8.44134	3.8898e-15
ENSG00000241213	LINC02024	8.19428	1.60183e-10
ENSG00000198331	HYLS1	8.17647	1.66359e-10
ENSG00000171794	UTF1	8.09262	2.93252e-10
ENSG00000008513	ST3GAL1	8.07282	1.64359e-33
ENSG00000260807	CEROX1	8.02246	4.29542e-20
ENSG00000168404	MLKL	7.99586	1.46503e-13
ENSG00000131668	BARX1	7.9899	1.28342e-13
ENSG00000143674	MAP3K21	7.91334	7.06995e-10
ENSG00000166106	ADAMTS15	7.90893	4.35902e-10
ENSG00000080493	SLC4A4	7.90137	3.63637e-101
ENSG00000130675	MNX1	7.89956	4.16809e-10
ENSG00000196352	CD55	7.87364	3.33693e-13
ENSG00000151790	TDO2	7.81723	4.69104e-19
ENSG00000163453	IGFBP7	7.75564	2.39895e-09
ENSG00000240393		7.71799	3.38957e-09
ENSG00000065320	NTN1	7.64016	2.23803e-47
ENSG00000157152	SYN2	7.64014	5.12403e-24
ENSG00000132170	PPARG	7.63372	2.27664e-09
ENSG00000198739	LRRTM3	7.6316	2.30367e-47
ENSG00000118407	FILIP1	7.5775	2.02634e-104
ENSG00000259583		7.57615	4.85012e-09
ENSG00000145777	TSLP	7.5738	5.54813e-09
ENSG00000155897	ADCY8	7.51098	1.20693e-08
ENSG00000066468	FGFR2	7.45029	6.39989e-09
ENSG00000180921	FAM83H	7.44514	8.6098e-56
ENSG00000182022	CHST15	7.42215	1.23963e-22
ENSG00000162722	TRIM58	7.40518	6.8547e-09
ENSG00000177133	PRDM16-DT	7.40349	1.68448e-08
ENSG00000131773	KHDRBS3	7.39342	5.17718e-77
ENSG00000163377	TAFA4	7.34633	2.54493e-08
ENSG00000159184	HOXB13	7.34378	1.02095e-08
ENSG00000124191	TOX2	7.23417	6.5467e-08
ENSG00000244414	CFHR1	7.22934	1.88443e-08
ENSG00000255240		7.19404	2.709e-08
ENSG00000261720		7.13239	7.85875e-08
ENSG00000182771	GRID1	7.12459	1.20223e-25
ENSG00000116675	DNAJC6	7.12427	9.01097e-21
ENSG00000101440	ASIP	7.06642	1.2545e-07
ENSG00000100599	RIN3	7.03342	3.50303e-15
ENSG00000242759	LINC00882	6.95294	1.51193e-57
ENSG00000124225	PMEPA1	6.93392	2.93548e-07
ENSG00000196557	CACNA1H	6.92809	5.42021e-134
ENSG00000256576	LINC02361	6.86319	2.97558e-07
ENSG00000070159	PTPN3	6.84499	4.6789e-65
ENSG00000106688	SLC1A1	6.81823	5.35533e-07
ENSG00000050628	PTGER3	6.81114	2.36022e-41
ENSG00000234257	SOD2P1	6.79501	2.17303e-07
ENSG00000186297	GABRA5	6.76606	4.64406e-23
ENSG00000232337		6.75946	5.71832e-14
ENSG00000124818	OPN5	6.75731	6.41556e-07
ENSG00000224271		6.74512	4.07883e-14
ENSG00000154237	LRRK1	6.72469	4.9265e-40
ENSG00000171811	CFAP46	6.71074	3.22243e-07
ENSG00000243479	MNX1-AS1	6.6739	9.72513e-07
ENSG00000284648		6.67259	7.95779e-07
ENSG00000005513	SOX8	6.66255	3.82787e-70
ENSG00000241787	MTND4P16	6.65293	1.11695e-06
ENSG00000248456	LINC02485	6.65054	1.22919e-06
ENSG00000197635	DPP4	6.65043	1.0804e-06
ENSG00000136944	LMX1B	6.64731	2.79142e-30
ENSG00000152953	STK32B	6.64419	2.31673e-09
ENSG00000236013		6.64373	2.66e-09
ENSG00000187268	FAM9C	6.62634	1.31641e-169
ENSG00000160223	ICOSLG	6.61183	1.34494e-06
ENSG00000166033	HTRA1	6.56545	2.7299e-13
ENSG00000287972		6.52552	3.15449e-06
ENSG00000187955	COL14A1	6.51326	6.26584e-09
ENSG00000165868	HSPA12A	6.50143	4.95464e-13
ENSG00000198879	SFMBT2	6.46178	1.29655e-24
ENSG00000270157		6.42835	4.72326e-06
ENSG00000127507	ADGRE2	6.40582	1.29225e-16
ENSG00000103528	SYT17	6.40249	1.23951e-08
ENSG00000034971	MYOC	6.35903	3.13922e-06
ENSG00000185565	LSAMP	6.35407	1.85672e-35
ENSG00000135749	PCNX2	6.32056	6.38856e-06
ENSG00000130558	OLFM1	6.30775	2.01097e-06
ENSG00000255299		6.28815	8.79439e-06
ENSG00000111799	COL12A1	6.25899	0
ENSG00000231216		6.23852	3.55073e-08
ENSG00000137273	FOXF2	6.17054	1.76795e-05
ENSG00000181982	CCDC149	6.17025	1.60011e-11
ENSG00000235601	BARX1-DT	6.16109	9.44771e-06
ENSG00000168234	TTC39C	6.14511	3.16007e-22
ENSG00000176927	EFCAB5	6.13339	6.16958e-26
ENSG00000260230	FRRS1L	6.13093	4.71631e-06
ENSG00000109738	GLRB	6.09559	2.54752e-11
ENSG00000184254	ALDH1A3	6.09364	7.16545e-22
ENSG00000224076		6.00723	3.25219e-05
ENSG00000254416	LINC02732	5.99532	1.19983e-05
ENSG00000141934	PLPP2	5.99041	8.97435e-28
ENSG00000196586	MYO6	5.98725	3.18825e-116
ENSG00000064195	DLX3	5.97876	2.5627e-14
ENSG00000273079	GRIN2B	5.93384	5.7002e-73
ENSG00000279844		5.90963	0.000108149
ENSG00000266865		5.89962	2.4154e-07
ENSG00000250192		5.86873	0.000123796
ENSG00000279839		5.85888	0.000126981
ENSG00000228033		5.85707	4.19614e-05
ENSG00000074211	PPP2R2C	5.83469	6.19395e-68
ENSG00000152969	JAKMIP1	5.81375	8.29312e-05
ENSG00000203499	IQANK1	5.81108	4.40777e-07
ENSG00000232667		5.80919	9.05123e-05
ENSG00000287730		5.80495	2.38894e-16
ENSG00000136630	HLX	5.78541	2.45303e-05
ENSG00000165164	CFAP47	5.77356	4.08423e-19
ENSG00000162542	TMCO4	5.76898	4.15378e-16
ENSG00000255622	PCDHB17P	5.76792	3.00283e-05
ENSG00000171476	HOPX	5.75241	9.85937e-05
ENSG00000160216	AGPAT3	5.73375	7.57038e-74
ENSG00000242836	MTCO3P35	5.70354	9.14436e-05
ENSG00000154914	USP43	5.69623	0.000141844
ENSG00000112379	ARFGEF3	5.68703	9.79051e-07
ENSG00000258334		5.64809	0.000121704
ENSG00000113578	FGF1	5.63539	6.21578e-24
ENSG00000224467		5.62571	1.50512e-06
ENSG00000166501	PRKCB	5.58656	8.31746e-18
ENSG00000127955	GNAI1	5.57908	5.43461e-213
ENSG00000250033	SLC7A11-AS1	5.57276	1.8025e-06
ENSG00000116819	TFAP2E	5.55254	9.48528e-18
ENSG00000284636		5.55173	2.1607e-06
ENSG00000013619	MAMLD1	5.53066	8.86522e-15
ENSG00000106236	NPTX2	5.4962	1.27371e-25
ENSG00000171798	KNDC1	5.41741	4.57207e-06
ENSG00000170837	GPR27	5.4	0.000119432
ENSG00000249580	MTATP6P22	5.38824	0.00063196
ENSG00000163689	C3orf67	5.36207	0.000151401
ENSG00000119771	KLHL29	5.34562	1.2879e-40
ENSG00000244701		5.32557	0.000718846
ENSG00000265660	MIR4664	5.32228	0.00113351
ENSG00000235716	KRT18P46	5.31865	0.00087299
ENSG00000145431	PDGFC	5.31176	8.15988e-162
ENSG00000102683	SGCG	5.31002	3.72464e-08
ENSG00000120149	MSX2	5.26683	8.71699e-06
ENSG00000198010	DLGAP2	5.24632	0.000551887
ENSG00000285960		5.24587	0.000996664
ENSG00000140090	SLC24A4	5.23448	1.28698e-59
ENSG00000150637	CD226	5.19276	3.25595e-10
ENSG00000284617		5.17599	0.00102888
ENSG00000125731	SH2D3A	5.17179	0.000235848
ENSG00000107104	KANK1	5.16966	5.87049e-86
ENSG00000235205	TATDN2P3	5.169	0.000896974
ENSG00000135638	EMX1	5.15308	0.00249467
ENSG00000189149	CRYM-AS1	5.14794	6.09698e-08
ENSG00000182957	SPATA13	5.13318	1.8738e-28
ENSG00000268089	GABRQ	5.12758	0.00031138
ENSG00000150907	FOXO1	5.1215	3.78545e-17
ENSG00000286447		5.10336	1.66048e-05
ENSG00000245067	IGFBP7-AS1	5.09474	0.00145982
ENSG00000251313		5.08356	0.00225839
ENSG00000257403		5.08349	0.00193641
ENSG00000158482	SNX29P1	5.08306	0.00242476
ENSG00000279981		5.08288	0.00261599
ENSG00000269113	TRABD2B	5.07425	2.66887e-05
ENSG00000277117		5.07393	2.27907e-05
ENSG00000083454	P2RX5	5.06487	4.49463e-12
ENSG00000129514	FOXA1	5.04383	4.4539e-12
ENSG00000196371	FUT4	5.03433	1.02487e-09
ENSG00000144339	TMEFF2	5.02601	1.36291e-20
ENSG00000162849	KIF26B	5.02351	1.23452e-165
ENSG00000183166	CALN1	5.01322	0.00230894
ENSG00000254877		5.00517	0.00197927
ENSG00000185483	ROR1	4.99827	0.000661668
ENSG00000119919	NKX2-3	4.99719	0.00258743
ENSG00000168481	LGI3	4.99621	0.000589367
ENSG00000228714		4.99551	4.82259e-16
ENSG00000260552		4.98971	0.00192573
ENSG00000166073	GPR176	4.97317	1.35133e-32
ENSG00000149289	ZC3H12C	4.96841	3.07748e-57
ENSG00000157168	NRG1	4.94336	1.14284e-14
ENSG00000154721	JAM2	4.93802	4.09871e-07
ENSG00000203489	HMGB1P39	4.91945	0.0079341
ENSG00000183662	TAFA1	4.91431	0.00621267
ENSG00000278385		4.9095	0.00319134
ENSG00000198732	SMOC1	4.90945	0.00247342
ENSG00000164393	ADGRF2	4.90471	0.00390215
ENSG00000182752	PAPPA	4.90262	5.62487e-291
ENSG00000168672	LRATD2	4.8995	3.77429e-43
ENSG00000283355		4.89724	0.00154725
ENSG00000167306	MYO5B	4.88562	6.79883e-09
ENSG00000150471	ADGRL3	4.88421	6.08848e-09
ENSG00000260244		4.87725	1.92318e-13
ENSG00000247774	PCED1B-AS1	4.85794	5.46483e-44
ENSG00000007944	MYLIP	4.85086	5.2301e-22
ENSG00000164116	GUCY1A1	4.84368	2.31925e-154
ENSG00000185015	CA13	4.82124	1.60503e-46
ENSG00000287537		4.81588	0.00398789
ENSG00000242214	MTND3P6	4.81555	0.0041082
ENSG00000285875		4.81085	0.00372617
ENSG00000279712		4.7979	0.0042696
ENSG00000213606	AKR1B10P1	4.79702	0.00630854
ENSG00000165995	CACNB2	4.76836	6.60362e-12
ENSG00000132334	PTPRE	4.75296	2.4418e-14
ENSG00000226091	LINC00937	4.75097	0.00138788
ENSG00000121297	TSHZ3	4.73837	0.000174368
ENSG00000080224	EPHA6	4.73333	1.2139e-82
ENSG00000113657	DPYSL3	4.7287	1.57944e-74
ENSG00000269891	ARHGAP19-SLIT1	4.728	0.010236
ENSG00000172379	ARNT2	4.71861	1.4049e-29
ENSG00000198283	OR5B21	4.71786	0.0133191
ENSG00000240034	MTND6P6	4.71191	0.00975329
ENSG00000263432	RN7SL689P	4.71166	0.00910334
ENSG00000264845		4.7066	0.00872425
ENSG00000269933		4.70106	0.00825472
ENSG00000123407	HOXC12	4.69695	0.00435762
ENSG00000261292		4.6963	0.00638772
ENSG00000262406	MMP12	4.69608	4.82448e-42
ENSG00000217684	RPS3AP24	4.69555	0.018466
ENSG00000286359		4.69181	0.00630104
ENSG00000122877	EGR2	4.68536	4.37369e-89
ENSG00000130270	ATP8B3	4.68191	6.46036e-23
ENSG00000053918	KCNQ1	4.68088	0.00258668
ENSG00000053747	LAMA3	4.6808	0.00291056
ENSG00000144290	SLC4A10	4.67308	2.54105e-06
ENSG00000109255	NMU	4.66434	1.16113e-15
ENSG00000033122	LRRC7	4.65613	3.13607e-129
ENSG00000226985	LINC01203	4.65333	4.97842e-08
ENSG00000139132	FGD4	4.63996	0.000231762
ENSG00000228707		4.62858	0.00327379
ENSG00000284727		4.61759	0.00323562
ENSG00000283674		4.6156	2.22525e-13
ENSG00000280105		4.60608	0.000219883
ENSG00000214999		4.60444	0.000243328
ENSG00000259207	ITGB3	4.60378	0.00963459
ENSG00000225299		4.59827	0.0094463
ENSG00000254786		4.59316	0.0119251
ENSG00000112406	HECA	4.58963	2.80895e-75
ENSG00000221332		4.5876	0.0220053
ENSG00000249767	ENPP7P10	4.5876	0.0216728
ENSG00000253438	PCAT1	4.58731	0.00915908
ENSG00000226891	LINC01359	4.58257	0.00898201
ENSG00000081985	IL12RB2	4.5821	0.00924757
ENSG00000249276		4.5818	0.0108399
ENSG00000197261	C6orf141	4.57696	0.00970892
ENSG00000172830	SSH3	4.57625	3.15677e-48
ENSG00000183317	EPHA10	4.57194	6.51825e-15
ENSG00000152669	CCNO	4.56775	0.00259362
ENSG00000261115	TMEM178B	4.56341	9.03433e-06
ENSG00000158966	CACHD1	4.52251	1.06186e-113
ENSG00000137449	CPEB2	4.4937	2.72949e-09
ENSG00000253137	PSMC2P2	4.47393	0.00916175
ENSG00000285895		4.46973	0.0155253
ENSG00000261030		4.46416	0.0150134
ENSG00000187122	SLIT1	4.45312	1.04809e-08
ENSG00000249138		4.45255	0.0128065
ENSG00000163508	EOMES	4.45193	1.19919e-193
ENSG00000287979		4.45172	0.0179435
ENSG00000124713	GNMT	4.44824	0.00870119
ENSG00000182103	FAM181B	4.44656	0.0132855
ENSG00000234913		4.44428	0.00428812
ENSG00000285722		4.43552	0.00458766
ENSG00000286642		4.4299	0.00587999
ENSG00000106078	COBL	4.41359	1.81907e-08
ENSG00000061455	PRDM6	4.39611	0.000690669
ENSG00000080854	IGSF9B	4.39509	8.86859e-20
ENSG00000105664	COMP	4.37655	1.20184e-11
ENSG00000129595	EPB41L4A	4.34924	2.42797e-08
ENSG00000054179	ENTPD2	4.34487	2.67706e-08
ENSG00000239632	MTND4LP3	4.32942	0.0418025
ENSG00000278498		4.32929	0.0362921
ENSG00000137198	GMPR	4.32875	0.0307546
ENSG00000284655		4.32831	0.0140551
ENSG00000252614	RNU6-807P	4.32249	0.0146015
ENSG00000277548		4.32211	0.0169944
ENSG00000249996	PPIC-AS1	4.3165	0.0145942
ENSG00000129682	FGF13	4.31484	0.0360703
ENSG00000197361	FBXL22	4.30426	0.0179402
ENSG00000257093	DENND11	4.29955	1.3198e-38
ENSG00000185269	NOTUM	4.29839	1.94669e-18
ENSG00000224388	BACE2-IT1	4.29623	0.00569634
ENSG00000179477	ALOX12B	4.29368	0.00591406
ENSG00000284610		4.28441	0.00737831
ENSG00000167941	SOST	4.26736	0.000941722
ENSG00000235592		4.2489	0.00112738
ENSG00000162407	PLPP3	4.24124	4.7714e-05
ENSG00000108176	DNAJC12	4.23875	6.19544e-47
ENSG00000180535	BHLHA15	4.23521	9.22206e-11
ENSG00000168938	PPIC	4.22469	2.26254e-35
ENSG00000043039	BARX2	4.21395	0.00933798
ENSG00000184669	OR7E14P	4.21038	0.00849372
ENSG00000250298	GIMD1	4.19395	0.0327196
ENSG00000154783	FGD5	4.18789	1.7214e-07
ENSG00000244004	RPS3AP19	4.18605	0.0269131
ENSG00000223855		4.17444	4.02344e-09
ENSG00000073861	TBX21	4.17265	0.0204928
ENSG00000176595	KBTBD11	4.17178	5.0969e-09
ENSG00000196611	MMP1	4.16817	5.39245e-247
ENSG00000234602	MCIDAS	4.16559	0.0373261
ENSG00000061918	GUCY1B1	4.1614	4.26068e-21
ENSG00000183072	NKX2-5	4.1614	1.13308e-57
ENSG00000137726	FXYD6	4.15823	0.0288503
ENSG00000135519	KCNH3	4.14012	1.52235e-93
ENSG00000164236	ANKRD33B	4.0856	3.53595e-27
ENSG00000258548	LINC00645	4.06469	0.0205721
ENSG00000156689	GLYATL2	4.05339	1.03083e-15
ENSG00000272808		4.05126	0.00226732
ENSG00000165312	OTUD1	4.04891	0.00157831
ENSG00000274849		4.04523	0.00909311
ENSG00000229359	PIN1P1	4.03965	0.0201097
ENSG00000170608	FOXA3	4.0385	7.95901e-10
ENSG00000224842		4.03602	0.011939
ENSG00000230691	MRPL35P4	4.01267	0.0441225
ENSG00000251408		4.01232	0.0423914
ENSG00000248514		4.01226	0.0390154
ENSG00000255693	LINC02389	4.01217	0.034058
ENSG00000196844	PATE2	4.00512	0.0418235
ENSG00000286575		4.00496	0.0363201
ENSG00000125813	PAX1	4.00471	0.0347081
ENSG00000115112	TFCP2L1	3.99742	2.06853e-22
ENSG00000238562	RNU7-159P	3.99716	0.049544
ENSG00000150630	VEGFC	3.99423	2.86672e-102
ENSG00000111490	TBC1D30	3.97415	1.02822e-180
ENSG00000162545	CAMK2N1	3.95574	9.23828e-07
ENSG00000170396	ZNF804A	3.95336	1.96667e-14
ENSG00000164659	KIAA1324L	3.94303	0.0294891
ENSG00000169083	AR	3.93864	1.15428e-06
ENSG00000250917		3.92066	0.000285955
ENSG00000003137	CYP26B1	3.91389	3.40618e-33
ENSG00000248206		3.90858	0.00502332
ENSG00000135549	PKIB	3.90409	2.2932e-05
ENSG00000197587	DMBX1	3.89611	9.02274e-10
ENSG00000189337	KAZN	3.87907	5.75728e-58
ENSG00000172985	SH3RF3	3.8744	6.60812e-36
ENSG00000227658		3.86401	0.0344029
ENSG00000272636	DOC2B	3.86333	1.18961e-45
ENSG00000242607	RPS3AP34	3.85177	0.00461538
ENSG00000104332	SFRP1	3.84965	0.0255651
ENSG00000266533	MIR3619	3.83796	0.00499373
ENSG00000280237	NA	3.81392	2.16654e-11
ENSG00000159640	ACE	3.81051	5.53482e-05
ENSG00000186868	MAPT	3.80939	1.3391e-34
ENSG00000141404	GNAL	3.79129	6.27211e-57
ENSG00000188051	TMEM221	3.772	0.000380193
ENSG00000283486	FAM95C	3.76193	4.8699e-08
ENSG00000168280	KIF5C	3.75943	1.68219e-30
ENSG00000133216	EPHB2	3.75872	2.70982e-36
ENSG00000119042	SATB2	3.75429	5.52685e-12
ENSG00000225345	SNX18P3	3.7524	6.37811e-16
ENSG00000006042	TMEM98	3.75143	1.89299e-13
ENSG00000162009	SSTR5	3.74456	0.0380439
ENSG00000075223	SEMA3C	3.7434	1.47325e-134
ENSG00000125430	HS3ST3B1	3.73537	0.0284872
ENSG00000132622	HSPA12B	3.73523	0.0321853
ENSG00000128805	ARHGAP22	3.73208	2.72725e-26
ENSG00000138134	STAMBPL1	3.72696	1.5346e-18
ENSG00000125845	BMP2	3.72468	0.0068086
ENSG00000050555	LAMC3	3.70688	9.38454e-163
ENSG00000159733	ZFYVE28	3.69031	2.63989e-15
ENSG00000255571	MIR9-3HG	3.6766	4.12188e-15
ENSG00000129295	LRRC6	3.67498	0.00735514
ENSG00000182389	CACNB4	3.67273	3.67354e-56
ENSG00000164442	CITED2	3.6659	3.65587e-173
ENSG00000197182	MIRLET7BHG	3.6569	9.02819e-65
ENSG00000279619		3.64527	0.0394123
ENSG00000179673	RPRML	3.63854	1.36655e-06
ENSG00000088992	TESC	3.63674	2.85571e-22
ENSG00000233384	CNIH3-AS2	3.63627	0.045953
ENSG00000140450	ARRDC4	3.63342	9.9687e-06
ENSG00000105855	ITGB8	3.63072	0.0409243
ENSG00000162551	ALPL	3.62779	3.45873e-119
ENSG00000182747	SLC35D3	3.62121	0.034892
ENSG00000267207		3.61637	0.0374825
ENSG00000256862	PARP11-AS1	3.61428	0.00153486
ENSG00000056291	NPFFR2	3.61399	0.0114383
ENSG00000279685	MAPT-IT1	3.61363	0.00835733
ENSG00000116254	CHD5	3.60551	2.7547e-143
ENSG00000060718	COL11A1	3.58066	0
ENSG00000157470	FAM81A	3.55585	6.24944e-10
ENSG00000154930	ACSS1	3.55123	5.52909e-16
ENSG00000151692	RNF144A	3.55074	2.35534e-17
ENSG00000180071	ANKRD18A	3.54397	1.7444e-42
ENSG00000116117	PARD3B	3.53614	1.18403e-07
ENSG00000259803	SLC22A31	3.5307	4.08365e-33
ENSG00000075643	MOCOS	3.5259	8.01784e-75
ENSG00000152779	SLC16A12	3.52446	0.0138974
ENSG00000007237	GAS7	3.51901	0.000393059
ENSG00000023892	DEF6	3.51097	2.96874e-47
ENSG00000261220		3.5084	0.00128934
ENSG00000120328	PCDHB12	3.50151	0.0448067
ENSG00000244363	RPL7P23	3.4966	0.0467678
ENSG00000259577	CERNA1	3.49153	0.0482554
ENSG00000240531	RPL21P123	3.48106	0.00515119
ENSG00000186564	FOXD2	3.47026	2.90214e-06
ENSG00000140519	RHCG	3.46753	0.00279164
ENSG00000185988	PLK5	3.46364	2.54171e-08
ENSG00000173320	STOX2	3.46171	1.8229e-100
ENSG00000069188	SDK2	3.4548	1.279e-59
ENSG00000128567	PODXL	3.44324	6.38905e-70
ENSG00000155792	DEPTOR	3.44167	0.000558785
ENSG00000140961	OSGIN1	3.43273	9.92255e-36
ENSG00000133816	MICAL2	3.4306	9.43514e-74
ENSG00000244694	PTCHD4	3.4216	2.47725e-17
ENSG00000145819	ARHGAP26	3.40886	4.94333e-31
ENSG00000272282	LINC02084	3.4008	4.29971e-07
ENSG00000186115	CYP4F2	3.39695	0.0219794
ENSG00000170545	SMAGP	3.39421	9.16841e-28
ENSG00000180999	C1orf105	3.38696	5.22502e-06
ENSG00000091428	RAPGEF4	3.36337	3.98846e-11
ENSG00000120915	EPHX2	3.35895	3.08058e-07
ENSG00000151468	CCDC3	3.347	3.73549e-21
ENSG00000101311	FERMT1	3.32749	3.45095e-43
ENSG00000116729	WLS	3.32131	4.58626e-62
ENSG00000239911	PRKAG2-AS1	3.32038	0.0197984
ENSG00000120875	DUSP4	3.3178	0.0231042
ENSG00000197461	PDGFA	3.31285	7.33849e-62
ENSG00000153714	LURAP1L	3.31017	1.42609e-120
ENSG00000140470	ADAMTS17	3.30466	0.00535824
ENSG00000128274	A4GALT	3.28712	5.0242e-13
ENSG00000055732	MCOLN3	3.28005	2.14213e-20
ENSG00000108813	DLX4	3.24739	1.03347e-05
ENSG00000253958	CLDN23	3.24639	0.000201269
ENSG00000186907	RTN4RL2	3.24469	3.95221e-145
ENSG00000173083	HPSE	3.2437	6.75709e-12
ENSG00000071575	TRIB2	3.23945	9.23901e-05
ENSG00000202184	RNU6-1283P	3.22975	0.0423476
ENSG00000284624		3.225	7.22184e-06
ENSG00000197943	PLCG2	3.21432	3.27464e-13
ENSG00000123364	HOXC13	3.20784	0.0341819
ENSG00000137501	SYTL2	3.19613	2.37152e-50
ENSG00000138311	ZNF365	3.17801	2.28162e-07
ENSG00000242082	SLC5A4-AS1	3.16374	0.00905599
ENSG00000184156	KCNQ3	3.1597	0.0436199
ENSG00000059377	TBXAS1	3.15285	0.00977872
ENSG00000180611	MB21D2	3.14272	0.0356517
ENSG00000234965	SHISA8	3.13896	7.22932e-10
ENSG00000125462	C1orf61	3.13873	7.23913e-06
ENSG00000029153	ARNTL2	3.13521	1.32138e-111
ENSG00000204860	FAM201A	3.12893	2.37398e-05
ENSG00000167861	HID1	3.1236	3.72457e-05
ENSG00000260916	CCPG1	3.11867	1.45608e-47
ENSG00000070193	FGF10	3.10536	3.76483e-139
ENSG00000115226	FNDC4	3.0921	1.09903e-10
ENSG00000111679	PTPN6	3.09197	2.44282e-18
ENSG00000171056	SOX7	3.08898	1.29625e-37
ENSG00000212122	TSSK1B	3.08304	0.0111397
ENSG00000135406	PRPH	3.08131	3.89525e-05
ENSG00000175344	CHRNA7	3.07756	0.0137638
ENSG00000114654	EFCC1	3.07585	3.34989e-12
ENSG00000095637	SORBS1	3.07235	9.37811e-08
ENSG00000265625		3.06398	8.78203e-07
ENSG00000231528	FAM225A	3.06303	0.0126299
ENSG00000211448	DIO2	3.06257	0.0457825
ENSG00000228293		3.06176	0.045511
ENSG00000148600	CDHR1	3.05022	0.0028998
ENSG00000214595	EML6	3.04091	1.6627e-53
ENSG00000151632	AKR1C2	3.03414	0.000296126
ENSG00000178695	KCTD12	3.03126	0.0132311
ENSG00000084628	NKAIN1	3.02897	1.04836e-24
ENSG00000181085	MAPK15	3.02855	1.04767e-17
ENSG00000156265	MAP3K7CL	3.02212	0.0151926
ENSG00000234869		3.01394	0.00826568
ENSG00000203930	LINC00632	3.00603	4.75954e-38
ENSG00000244274	DBNDD2	2.99087	1.16501e-11
ENSG00000256035		2.99063	0.00140702
ENSG00000262576	PCDHGA4	2.98178	0.000109646
ENSG00000275183	LENG9	2.96891	2.07223e-07
ENSG00000165905	LARGE2	2.96786	2.05339e-58
ENSG00000157890	MEGF11	2.95932	5.97226e-16
ENSG00000236120		2.95744	0.0192669
ENSG00000168748	CA7	2.95235	0.00562691
ENSG00000156103	MMP16	2.95049	1.68232e-89
ENSG00000206538	VGLL3	2.94396	6.8252e-273
ENSG00000171444	MCC	2.93923	1.63429e-66
ENSG00000183230	CTNNA3	2.92717	3.84001e-19
ENSG00000110031	LPXN	2.92641	1.81102e-45
ENSG00000248464	FGF10-AS1	2.9256	3.75319e-23
ENSG00000167549	CORO6	2.92498	3.86521e-75
ENSG00000046653	GPM6B	2.9206	5.44537e-09
ENSG00000220804	LINC01881	2.90795	0.0018737
ENSG00000134369	NAV1	2.90254	2.65888e-197
ENSG00000110492	MDK	2.89925	2.31935e-67
ENSG00000105251	SHD	2.89633	0.00612265
ENSG00000163273	NPPC	2.89075	4.2901e-14
ENSG00000143028	SYPL2	2.88798	1.52263e-15
ENSG00000137941	TTLL7	2.86641	6.7314e-26
ENSG00000251244		2.86467	0.0149913
ENSG00000107819	SFXN3	2.86274	8.35043e-22
ENSG00000147459	DOCK5	2.86161	1.45384e-150
ENSG00000003400	CASP10	2.86042	1.02891e-08
ENSG00000176387	HSD11B2	2.8574	8.19473e-13
ENSG00000196781	TLE1	2.84693	1.50067e-56
ENSG00000175147	TMEM51-AS1	2.84514	0.000830976
ENSG00000049130	KITLG	2.84497	4.87833e-242
ENSG00000172594	SMPDL3A	2.84188	0.00328407
ENSG00000154040	CABYR	2.84145	5.37237e-22
ENSG00000076641	PAG1	2.83764	4.76283e-61
ENSG00000164687	FABP5	2.82516	2.37518e-33
ENSG00000064835	POU1F1	2.8245	3.68343e-46
ENSG00000221740	SNORD93	2.81735	0.0314758
ENSG00000182759	MAFA	2.81125	1.01579e-30
ENSG00000251639		2.80821	0.0241778
ENSG00000006071	ABCC8	2.80512	4.30692e-11
ENSG00000255366		2.80017	0.0327844
ENSG00000167600	CYP2S1	2.79794	2.11396e-21
ENSG00000011638	TMEM159	2.79197	6.86237e-08
ENSG00000241956		2.78537	0.000659888
ENSG00000120949	TNFRSF8	2.77889	0.00602857
ENSG00000144891	AGTR1	2.76335	0.000179332
ENSG00000171246	NPTX1	2.7589	5.97385e-13
ENSG00000176909	MAMSTR	2.75378	1.95254e-16
ENSG00000189184	PCDH18	2.74042	1.53518e-17
ENSG00000104327	CALB1	2.72412	6.88907e-06
ENSG00000011105	TSPAN9	2.72192	8.0438e-150
ENSG00000173918	C1QTNF1	2.71897	0.0430804
ENSG00000124216	SNAI1	2.71618	3.31558e-18
ENSG00000183779	ZNF703	2.70882	3.26054e-25
ENSG00000265713		2.70672	1.05224e-06
ENSG00000162434	JAK1	2.70292	2.91858e-264
ENSG00000261652	C15orf65	2.69734	1.4141e-07
ENSG00000240038	AMY2B	2.69495	0.00117488
ENSG00000004838	ZMYND10	2.68945	4.49483e-06
ENSG00000178919	FOXE1	2.67718	3.00297e-09
ENSG00000227893	LINC00352	2.67326	0.0232625
ENSG00000107954	NEURL1	2.67169	0.000145745
ENSG00000186897	C1QL4	2.66874	1.39791e-37
ENSG00000101265	RASSF2	2.66588	3.15677e-48
ENSG00000253485	PCDHGA5	2.66282	0.00301906
ENSG00000280362		2.66239	1.37757e-06
ENSG00000160219	GAB3	2.66166	0.0186678
ENSG00000011347	SYT7	2.65845	1.63584e-17
ENSG00000005102	MEOX1	2.65067	5.47393e-40
ENSG00000230184	SMYD3-IT1	2.64784	0.000274791
ENSG00000221059	RNU6ATAC6P	2.6473	0.0148601
ENSG00000169668	BCRP2	2.64407	0.0344372
ENSG00000227189		2.64395	7.7885e-07
ENSG00000146072	TNFRSF21	2.63815	3.07076e-100
ENSG00000186994	KANK3	2.63653	1.75839e-10
ENSG00000180336	MEIOC	2.63123	6.62226e-37
ENSG00000103811	CTSH	2.62355	1.25645e-19
ENSG00000262528		2.61945	7.08311e-12
ENSG00000124507	PACSIN1	2.61379	6.00059e-12
ENSG00000166415	WDR72	2.6113	1.07835e-78
ENSG00000075651	PLD1	2.61025	0.000742106
ENSG00000170485	NPAS2	2.60398	4.921e-38
ENSG00000288084		2.60155	1.73073e-08
ENSG00000258181		2.59829	0.00621398
ENSG00000137767	SQOR	2.59402	0.0314859
ENSG00000227292		2.593	0.00298161
ENSG00000125726	CD70	2.5916	1.34792e-60
ENSG00000133739	LRRCC1	2.58671	1.26328e-44
ENSG00000165633	VSTM4	2.58578	0.000140115
ENSG00000261026		2.57308	0.00291485
ENSG00000196074	SYCP2	2.5723	2.28395e-57
ENSG00000280537		2.56917	0.049346
ENSG00000129910	CDH15	2.56866	3.19432e-06
ENSG00000140284	SLC27A2	2.56014	5.81803e-33
ENSG00000107736	CDH23	2.55709	4.13579e-10
ENSG00000196358	NTNG2	2.55206	0.000144432
ENSG00000153898	MCOLN2	2.55197	7.28114e-29
ENSG00000137819	PAQR5	2.54866	1.3471e-08
ENSG00000117013	KCNQ4	2.54714	2.75953e-18
ENSG00000250073		2.54645	0.00525462
ENSG00000142552	RCN3	2.54399	3.40636e-37
ENSG00000168505	GBX2	2.54352	0.00129444
ENSG00000216817	R3HDM2P2	2.53812	5.03891e-19
ENSG00000189127	ANKRD34B	2.53529	2.67451e-24
ENSG00000177606	JUN	2.53494	4.66494e-15
ENSG00000099337	KCNK6	2.53337	2.81606e-25
ENSG00000198576	ARC	2.53219	3.21708e-62
ENSG00000122644	ARL4A	2.52913	2.39492e-15
ENSG00000214428	NPM1P10	2.52754	2.81582e-09
ENSG00000163491	NEK10	2.52634	3.93377e-12
ENSG00000213901	SLC23A3	2.51727	0.0118228
ENSG00000089558	KCNH4	2.51695	0.0065929
ENSG00000099958	DERL3	2.51385	4.78515e-65
ENSG00000239861		2.50628	0.0124809
ENSG00000238062	SPATA3-AS1	2.50427	1.66815e-05
ENSG00000106537	TSPAN13	2.50253	2.66906e-66
ENSG00000111057	KRT18	2.49975	5.34407e-28
ENSG00000130829	DUSP9	2.48827	9.26877e-41
ENSG00000287364		2.47818	1.47305e-40
ENSG00000180720	CHRM4	2.47426	0.000640476
ENSG00000153790	C7orf31	2.47143	8.73424e-27
ENSG00000096433	ITPR3	2.46844	3.3811e-202
ENSG00000115841	RMDN2	2.46393	3.65977e-63
ENSG00000138646	HERC5	2.46376	1.44348e-27
ENSG00000178222	RNF212	2.46273	4.36656e-50
ENSG00000179292	TMEM151A	2.46224	6.65775e-06
ENSG00000010278	CD9	2.45087	4.45473e-19
ENSG00000115194	SLC30A3	2.45041	0.000176707
ENSG00000280276		2.44532	0.000123955
ENSG00000264007		2.43385	0.0030188
ENSG00000187486	KCNJ11	2.4262	5.14335e-10
ENSG00000203995	ZYG11A	2.41817	5.55214e-65
ENSG00000177374	HIC1	2.41554	6.37688e-70
ENSG00000058404	CAMK2B	2.41331	1.15025e-07
ENSG00000217801		2.41185	0.0176408
ENSG00000136928	GABBR2	2.40843	1.17379e-06
ENSG00000284874		2.40557	0.0169526
ENSG00000091409	ITGA6	2.40338	4.20466e-181
ENSG00000101144	BMP7	2.3964	1.43472e-90
ENSG00000134996	OSTF1	2.38798	2.26771e-14
ENSG00000119900	OGFRL1	2.3875	6.64931e-20
ENSG00000116014	KISS1R	2.38647	0.0371436
ENSG00000095203	EPB41L4B	2.38605	1.98682e-36
ENSG00000237070		2.38427	0.00753618
ENSG00000259933		2.37228	0.00362139
ENSG00000153012	LGI2	2.35727	0.012887
ENSG00000232977	LINC00327	2.35317	0.00213764
ENSG00000179097	HTR1F	2.35056	6.32457e-38
ENSG00000146054	TRIM7	2.34531	5.6747e-14
ENSG00000078081	LAMP3	2.33175	0.00713665
ENSG00000183873	SCN5A	2.32758	3.22908e-10
ENSG00000255300	LINC02745	2.31916	1.51691e-07
ENSG00000261594	TPBGL	2.31557	0.0114319
ENSG00000226900		2.31381	0.0154129
ENSG00000075340	ADD2	2.3096	1.52323e-34
ENSG00000206190	ATP10A	2.30951	4.40586e-25
ENSG00000138623	SEMA7A	2.30882	4.35917e-19
ENSG00000101222	SPEF1	2.30855	0.000216377
ENSG00000155657	TTN	2.30587	0.000258544
ENSG00000065923	SLC9A7	2.30519	3.69868e-77
ENSG00000111424	VDR	2.30072	1.182e-63
ENSG00000138650	PCDH10	2.29912	0
ENSG00000162804	SNED1	2.28889	4.01518e-08
ENSG00000236671	PRKG1-AS1	2.28656	5.98867e-11
ENSG00000188859	FAM78B	2.28058	0.038955
ENSG00000153993	SEMA3D	2.27471	6.77493e-164
ENSG00000277287		2.26866	7.32254e-12
ENSG00000031081	ARHGAP31	2.26457	0.00112181
ENSG00000119865	CNRIP1	2.26093	1.13532e-08
ENSG00000254221	PCDHGB1	2.25915	5.15777e-05
ENSG00000116761	CTH	2.25519	3.43439e-27
ENSG00000115041	KCNIP3	2.25232	5.15531e-49
ENSG00000099204	ABLIM1	2.24837	6.10732e-135
ENSG00000163171	CDC42EP3	2.24492	3.26252e-42
ENSG00000183145	RIPPLY3	2.24282	1.42488e-07
ENSG00000176225	RTTN	2.24187	6.08016e-302
ENSG00000213047	DENND1B	2.23386	4.07305e-17
ENSG00000155011	DKK2	2.23227	7.57488e-65
ENSG00000173227	SYT12	2.22902	4.03297e-08
ENSG00000182040	USH1G	2.21872	1.92012e-09
ENSG00000259280		2.21612	0.00146964
ENSG00000065717	TLE2	2.21589	4.12354e-63
ENSG00000164855	TMEM184A	2.21478	0.00247122
ENSG00000007516	BAIAP3	2.21313	1.6477e-05
ENSG00000141298	SSH2	2.2077	0
ENSG00000274307	NA	2.20074	0.0158762
ENSG00000215386	MIR99AHG	2.1988	2.40253e-99
ENSG00000127863	TNFRSF19	2.19863	9.78056e-210
ENSG00000081181	ARG2	2.19443	1.417e-36
ENSG00000163462	TRIM46	2.18356	8.75569e-06
ENSG00000232526	VDAC1P13	2.17272	0.0010743
ENSG00000100626	GALNT16	2.16481	4.43432e-46
ENSG00000180815	MAP3K15	2.15891	5.85763e-25
ENSG00000225578	NCBP2-AS1	2.15177	0.0339485
ENSG00000224940	PRRT4	2.14692	9.18202e-07
ENSG00000196141	SPATS2L	2.14322	0.00070222
ENSG00000260750		2.13992	0.0113527
ENSG00000266578		2.13826	0.0189196
ENSG00000115594	IL1R1	2.13777	1.05921e-19
ENSG00000076944	STXBP2	2.13357	1.68098e-23
ENSG00000112619	PRPH2	2.13243	1.42088e-21
ENSG00000225793		2.13107	0.000127741
ENSG00000108823	SGCA	2.12935	8.98485e-09
ENSG00000064042	LIMCH1	2.128	0.00094804
ENSG00000123685	BATF3	2.12363	0.000266784
ENSG00000253305	PCDHGB6	2.12343	7.27122e-07
ENSG00000109472	CPE	2.11644	5.88961e-16
ENSG00000257489		2.11569	5.40857e-05
ENSG00000110090	CPT1A	2.11234	1.654e-120
ENSG00000114656	KIAA1257	2.11038	1.67629e-10
ENSG00000078900	TP73	2.10553	7.32175e-47
ENSG00000234964	FABP5P7	2.10105	0.000395529
ENSG00000259075	POC1B-GALNT4	2.09782	0.0454361
ENSG00000171310	CHST11	2.09375	1.40871e-30
ENSG00000236924		2.08807	0.00117381
ENSG00000150510	FAM124A	2.08384	0.00104494
ENSG00000123104	ITPR2	2.07899	7.62545e-77
ENSG00000158748	HTR6	2.07717	3.41958e-06
ENSG00000100036	SLC35E4	2.07187	6.84508e-34
ENSG00000179388	EGR3	2.06892	1.40232e-50
ENSG00000132821	VSTM2L	2.06681	0.00131851
ENSG00000206052	DOK6	2.06579	1.72224e-11
ENSG00000127084	FGD3	2.05674	0.000219289
ENSG00000115263	GCG	2.05659	5.27625e-06
ENSG00000101160	CTSZ	2.05501	1.4876e-53
ENSG00000050344	NFE2L3	2.05442	2.8511e-42
ENSG00000165959	CLMN	2.04701	5.70945e-20
ENSG00000168389	MFSD2A	2.04691	1.75679e-48
ENSG00000241288	LINC02614	2.04351	0.011515
ENSG00000247317	LY6E-DT	2.0429	0.00428322
ENSG00000171462	DLK2	2.03783	2.87791e-21
ENSG00000166147	FBN1	2.03634	2.5049e-147
ENSG00000106327	TFR2	2.03334	1.18077e-41
ENSG00000164684	ZNF704	2.02998	8.01784e-75
ENSG00000278041		2.02716	2.86153e-08
ENSG00000145632	PLK2	2.02594	4.01128e-118
ENSG00000131781	FMO5	2.02515	0.00270764
ENSG00000286997		2.02441	4.84807e-15
ENSG00000183682	BMP8A	2.01681	0.0264982
ENSG00000064393	HIPK2	2.01598	9.62146e-60
ENSG00000196932	TMEM26	2.01532	6.60812e-36
ENSG00000164976	MYORG	2.01055	3.08468e-45
ENSG00000286811		2.00391	0.000318249
ENSG00000163947	ARHGEF3	2.00366	1.79305e-13
ENSG00000114646	CSPG5	2.00238	2.01691e-29
ENSG00000166689	PLEKHA7	1.99693	5.32303e-11
ENSG00000141753	IGFBP4	1.98884	2.00082e-33
ENSG00000162426	SLC45A1	1.98857	0.00120751
ENSG00000183196	CHST6	1.98803	5.38828e-50
ENSG00000135540	NHSL1	1.98706	9.29201e-15
ENSG00000164023	SGMS2	1.98069	9.92948e-55
ENSG00000127585	FBXL16	1.97818	9.98283e-12
ENSG00000089327	FXYD5	1.9734	3.45601e-55
ENSG00000167702	KIFC2	1.96916	5.33831e-82
ENSG00000088836	SLC4A11	1.96881	3.98577e-96
ENSG00000104140	RHOV	1.96589	1.82617e-12
ENSG00000198429	ZNF69	1.96089	0.00757765
ENSG00000137261	KIAA0319	1.94864	0.000240153
ENSG00000134775	FHOD3	1.94486	0.0161227
ENSG00000100078	PLA2G3	1.94328	6.59311e-20
ENSG00000013588	GPRC5A	1.92762	0.0115075
ENSG00000286850		1.92456	4.33539e-05
ENSG00000280432		1.92152	0.0183418
ENSG00000079691	CARMIL1	1.92139	4.60256e-56
ENSG00000149564	ESAM	1.91901	0.000102708
ENSG00000054392	HHAT	1.91314	0.0137389
ENSG00000129993	CBFA2T3	1.9108	5.85191e-09
ENSG00000107165	TYRP1	1.90898	2.62891e-131
ENSG00000141682	PMAIP1	1.90763	9.03062e-11
ENSG00000226642	ACTG1P12	1.88652	0.0119955
ENSG00000070886	EPHA8	1.88376	1.48191e-20
ENSG00000171517	LPAR3	1.88125	1.83596e-27
ENSG00000176485	PLAAT3	1.8792	3.05863e-18
ENSG00000182463	TSHZ2	1.87758	0.000178532
ENSG00000118946	PCDH17	1.87482	4.12308e-25
ENSG00000128512	DOCK4	1.87316	3.89525e-05
ENSG00000170873	MTSS1	1.87306	1.33052e-14
ENSG00000005059	MCUB	1.86575	1.97557e-33
ENSG00000117643	MAN1C1	1.86175	0.000294646
ENSG00000263050		1.86109	0.0359904
ENSG00000100196	KDELR3	1.86015	1.7249e-41
ENSG00000167588	GPD1	1.85699	0.0463169
ENSG00000128203	ASPHD2	1.85491	1.05545e-19
ENSG00000173213	TUBB8B	1.85445	0.00421388
ENSG00000072682	P4HA2	1.85409	3.57156e-72
ENSG00000006534	ALDH3B1	1.85189	0.00016384
ENSG00000178821	TMEM52	1.85045	1.89046e-21
ENSG00000151726	ACSL1	1.84562	7.97766e-97
ENSG00000251652		1.83854	0.0138342
ENSG00000154639	CXADR	1.83691	3.04137e-15
ENSG00000159403	C1R	1.82921	1.75912e-05
ENSG00000254854		1.82769	0.0101146
ENSG00000167676	PLIN4	1.82616	1.16396e-06
ENSG00000187699	C2orf88	1.8249	2.66641e-06
ENSG00000143382	ADAMTSL4	1.82391	4.42591e-24
ENSG00000161249	DMKN	1.81479	1.70361e-40
ENSG00000164125	GASK1B	1.81163	1.32327e-13
ENSG00000253846	PCDHGA10	1.81148	1.88809e-12
ENSG00000226287	TMEM191A	1.80748	0.008131
ENSG00000248429	FAM198B-AS1	1.80646	0.011727
ENSG00000167874	TMEM88	1.80292	0.0482554
ENSG00000105643	ARRDC2	1.8009	5.21954e-37
ENSG00000175161	CADM2	1.79772	3.38432e-50
ENSG00000185614	INKA1	1.79711	6.32279e-06
ENSG00000267607		1.79632	2.33316e-08
ENSG00000176845	METRNL	1.79567	6.47099e-20
ENSG00000268041	ERFL	1.79436	6.24198e-05
ENSG00000276533		1.78646	0.0374825
ENSG00000197535	MYO5A	1.78215	3.84392e-109
ENSG00000136052	SLC41A2	1.77706	9.84387e-16
ENSG00000269949		1.77181	0.0161454
ENSG00000184307	ZDHHC23	1.77127	2.83628e-82
ENSG00000050767	COL23A1	1.76825	5.15933e-31
ENSG00000158813	EDA	1.76278	9.26782e-16
ENSG00000266258	LINC01909	1.76144	0.00579811
ENSG00000059915	PSD	1.76111	3.03989e-09
ENSG00000074370	ATP2A3	1.76002	1.09624e-10
ENSG00000198001	IRAK4	1.75807	1.1789e-06
ENSG00000110042	DTX4	1.75192	4.94765e-98
ENSG00000144730	IL17RD	1.75016	1.04781e-24
ENSG00000162174	ASRGL1	1.7454	5.08362e-09
ENSG00000171729	TMEM51	1.74294	1.09735e-24
ENSG00000198945	L3MBTL3	1.74228	4.68894e-05
ENSG00000124615	MOCS1	1.74193	3.06226e-16
ENSG00000158710	TAGLN2	1.74166	1.41862e-47
ENSG00000228158	TLE1P1	1.74113	0.045511
ENSG00000185420	SMYD3	1.741	3.29106e-55
ENSG00000204396	VWA7	1.73916	0.0181655
ENSG00000181350	LRRC75A	1.73908	4.62621e-05
ENSG00000013297	CLDN11	1.73413	3.59687e-06
ENSG00000107338	SHB	1.73312	2.12104e-12
ENSG00000120738	EGR1	1.72698	7.5954e-161
ENSG00000198892	SHISA4	1.71828	3.15414e-14
ENSG00000180694	TMEM64	1.71404	8.09077e-72
ENSG00000125898	FAM110A	1.70781	1.07592e-12
ENSG00000219438	TAFA5	1.70528	7.64285e-06
ENSG00000197766	CFD	1.70463	6.43145e-12
ENSG00000149968	MMP3	1.70217	1.23022e-167
ENSG00000129317	PUS7L	1.70065	1.60593e-17
ENSG00000035664	DAPK2	1.69609	0.0171366
ENSG00000163485	ADORA1	1.69562	7.35502e-12
ENSG00000088340	FER1L4	1.69422	8.37619e-21
ENSG00000277200		1.69037	0.00319134
ENSG00000081923	ATP8B1	1.68574	0.0215836
ENSG00000168528	SERINC2	1.68487	0.000875783
ENSG00000160111	CPAMD8	1.68279	0.00284614
ENSG00000078804	TP53INP2	1.6755	9.2786e-50
ENSG00000071282	LMCD1	1.675	9.1435e-08
ENSG00000099377	HSD3B7	1.67204	8.06784e-17
ENSG00000168952	STXBP6	1.67068	4.57791e-11
ENSG00000074410	CA12	1.67035	1.05982e-73
ENSG00000130751	NPAS1	1.66825	1.7415e-48
ENSG00000115107	STEAP3	1.66445	6.84049e-65
ENSG00000165731	RET	1.66341	6.48042e-07
ENSG00000112414	ADGRG6	1.66338	2.98553e-18
ENSG00000165169	DYNLT3	1.66107	1.59103e-07
ENSG00000164695	CHMP4C	1.65631	5.39052e-34
ENSG00000248449	PCDHGB8P	1.65619	0.0371032
ENSG00000142197	DOP1B	1.65351	5.46186e-22
ENSG00000147804	SLC39A4	1.65258	4.06148e-22
ENSG00000101210	EEF1A2	1.65254	2.95787e-121
ENSG00000132470	ITGB4	1.65121	0.0032726
ENSG00000116396	KCNC4	1.65033	2.14213e-20
ENSG00000114166	KAT2B	1.64672	4.59521e-16
ENSG00000137267	TUBB2A	1.64604	3.8409e-17
ENSG00000127528	KLF2	1.6419	2.39761e-19
ENSG00000131370	SH3BP5	1.63962	1.28475e-26
ENSG00000154229	PRKCA	1.6391	2.7222e-22
ENSG00000288075		1.63704	0.0337644
ENSG00000204052	LRRC73	1.63599	1.94666e-11
ENSG00000111962	UST	1.63471	0.0135772
ENSG00000204683	C10orf113	1.63384	0.0245998
ENSG00000196139	AKR1C3	1.6281	0.0148051
ENSG00000197070	ARRDC1	1.62726	8.83814e-28
ENSG00000149927	DOC2A	1.62339	1.10857e-11
ENSG00000182010	RTKN2	1.62063	9.1426e-23
ENSG00000280670	CCDC163	1.61757	1.28145e-07
ENSG00000256751	PLBD1-AS1	1.61727	0.011898
ENSG00000125878	TCF15	1.61552	6.94762e-07
ENSG00000198720	ANKRD13B	1.61335	4.39943e-95
ENSG00000120322	PCDHB8	1.61041	0.00429919
ENSG00000242689	CNTF	1.60916	2.17503e-10
ENSG00000167705	RILP	1.60061	3.91848e-09
ENSG00000019582	CD74	1.5982	2.48674e-05
ENSG00000141576	RNF157	1.59256	2.69732e-34
ENSG00000168792	ABHD15	1.59051	8.26086e-73
ENSG00000197479	PCDHB11	1.58709	0.00109996
ENSG00000148344	PTGES	1.58264	1.54109e-14
ENSG00000185551	NR2F2	1.58255	1.22402e-21
ENSG00000164114	MAP9	1.58117	1.85412e-105
ENSG00000175155	YPEL2	1.57979	1.00973e-05
ENSG00000228649	SNHG26	1.57785	1.84995e-21
ENSG00000156076	WIF1	1.57517	5.2795e-48
ENSG00000158555	GDPD5	1.57367	0.00422983
ENSG00000155893	PXYLP1	1.57108	1.36489e-11
ENSG00000162433	AK4	1.56797	2.6801e-45
ENSG00000010818	HIVEP2	1.56741	0.00180689
ENSG00000154188	ANGPT1	1.56474	2.06517e-14
ENSG00000110057	UNC93B1	1.56363	3.35986e-15
ENSG00000136002	ARHGEF4	1.5607	2.4025e-22
ENSG00000158106	RHPN1	1.55527	1.1701e-41
ENSG00000007171	NOS2	1.55499	3.72816e-06
ENSG00000198944	SOWAHA	1.55449	0.000118385
ENSG00000240204	SMKR1	1.55396	2.63299e-05
ENSG00000004399	PLXND1	1.54936	1.46788e-60
ENSG00000104361	NIPAL2	1.54872	0.00115249
ENSG00000181649	PHLDA2	1.54746	5.91358e-14
ENSG00000280010		1.54191	1.48899e-05
ENSG00000185585	OLFML2A	1.5412	2.35482e-09
ENSG00000243701	DUBR	1.53686	1.83464e-39
ENSG00000131242	RAB11FIP4	1.53477	2.53957e-18
ENSG00000163531	NFASC	1.52924	0.00569096
ENSG00000111879	FAM184A	1.52753	0.000265586
ENSG00000141506	PIK3R5	1.52018	0.0246043
ENSG00000139200	PIANP	1.5178	7.74568e-29
ENSG00000148842	CNNM2	1.51682	4.17646e-99
ENSG00000214456	PLIN5	1.5152	0.0002166
ENSG00000014914	MTMR11	1.51248	1.86421e-43
ENSG00000184792	OSBP2	1.51172	3.42219e-15
ENSG00000149922	TBX6	1.51168	0.00806128
ENSG00000088881	EBF4	1.51166	2.47523e-06
ENSG00000175895	PLEKHF2	1.51073	4.92405e-10
ENSG00000104497	SNX16	1.51042	1.54484e-84
ENSG00000105976	MET	1.50548	0.00765378
ENSG00000143772	ITPKB	1.50169	5.18007e-41
ENSG00000153237	CCDC148	1.49965	0.00171782
ENSG00000181418	DDN	1.49674	1.05938e-33
ENSG00000278971		1.49491	0.000310781
ENSG00000197223	C1D	1.4946	2.44649e-17
ENSG00000169783	LINGO1	1.49339	8.5491e-17
ENSG00000136560	TANK	1.49295	1.43268e-55
ENSG00000154447	SH3RF1	1.48784	7.93312e-19
ENSG00000146950	SHROOM2	1.48734	0.000182556
ENSG00000237399	PITRM1-AS1	1.48535	0.0424624
ENSG00000080200	CRYBG3	1.48311	3.4889e-44
ENSG00000070404	FSTL3	1.48127	1.65292e-26
ENSG00000205861	PCOTH	1.47924	0.00164577
ENSG00000248590	GLDCP1	1.47609	2.02131e-08
ENSG00000184271	POU6F1	1.47455	8.27637e-17
ENSG00000254682		1.47397	0.0340889
ENSG00000197442	MAP3K5	1.47346	1.5771e-13
ENSG00000137714	FDX1	1.47011	2.09207e-33
ENSG00000272945		1.46698	0.00187577
ENSG00000125827	TMX4	1.45819	1.15396e-56
ENSG00000164626	KCNK5	1.45582	6.75929e-19
ENSG00000068615	REEP1	1.45269	0.000570711
ENSG00000065361	ERBB3	1.4506	2.03217e-21
ENSG00000127124	HIVEP3	1.44691	2.69689e-35
ENSG00000106852	LHX6	1.4469	1.58652e-26
ENSG00000237943	PRKCQ-AS1	1.44655	0.000113729
ENSG00000007264	MATK	1.44326	3.28364e-43
ENSG00000121743	GJA3	1.43944	5.84588e-26
ENSG00000129596	CDO1	1.43789	1.2158e-08
ENSG00000204060	FOXO6	1.4365	0.000160208
ENSG00000253368	TRNP1	1.43508	1.66007e-08
ENSG00000141314	RHBDL3	1.43319	0.000260114
ENSG00000104205	SGK3	1.43102	5.66035e-13
ENSG00000214975	PPIAP29	1.42948	0.0131399
ENSG00000172350	ABCG4	1.42734	0.00681055
ENSG00000109099	PMP22	1.42692	1.15857e-06
ENSG00000104312	RIPK2	1.42521	1.09722e-74
ENSG00000134070	IRAK2	1.42433	3.22939e-06
ENSG00000142178	SIK1	1.42207	0.000223052
ENSG00000159247	TUBBP5	1.42155	2.13734e-06
ENSG00000257086		1.42138	3.86746e-05
ENSG00000182325	FBXL6	1.42131	2.49465e-30
ENSG00000246263	UBR5-AS1	1.42064	0.000356384
ENSG00000072954	TMEM38A	1.41812	2.21582e-15
ENSG00000009950	MLXIPL	1.41752	1.21151e-09
ENSG00000079337	RAPGEF3	1.41357	5.36319e-06
ENSG00000203877	RIPPLY2	1.4125	8.83992e-06
ENSG00000171004	HS6ST2	1.4106	1.75985e-32
ENSG00000176438	SYNE3	1.40596	3.88103e-05
ENSG00000167191	GPRC5B	1.40214	6.12573e-23
ENSG00000095397	WHRN	1.40042	1.00073e-26
ENSG00000164142	FAM160A1	1.39936	1.65055e-05
ENSG00000022567	SLC45A4	1.39574	4.42671e-31
ENSG00000253873	PCDHGA11	1.39262	0.0119346
ENSG00000139173	TMEM117	1.39239	8.647e-12
ENSG00000255650	FAM222A-AS1	1.39031	0.000906792
ENSG00000198624	CCDC69	1.38297	5.47539e-05
ENSG00000179348	GATA2	1.38212	9.25531e-99
ENSG00000135324	MRAP2	1.37857	7.3819e-06
ENSG00000283415		1.3738	0.0011555
ENSG00000101096	NFATC2	1.37015	4.13265e-15
ENSG00000008283	CYB561	1.36994	9.69753e-28
ENSG00000287616		1.36792	1.32327e-13
ENSG00000184545	DUSP8	1.36626	0.0247046
ENSG00000164300	SERINC5	1.36325	1.937e-39
ENSG00000232110		1.36224	1.65814e-30
ENSG00000163472	TMEM79	1.36045	1.91889e-16
ENSG00000010319	SEMA3G	1.35925	4.2244e-07
ENSG00000138744	NAAA	1.35887	3.10665e-34
ENSG00000006282	SPATA20	1.35478	3.87854e-26
ENSG00000225614	ZNF469	1.35329	0.013675
ENSG00000068724	TTC7A	1.35265	4.64301e-26
ENSG00000233080	LINC01399	1.35242	0.0160152
ENSG00000253676	TAGLN2P1	1.3523	0.00024249
ENSG00000122547	EEPD1	1.34954	7.26956e-20
ENSG00000105963	ADAP1	1.34707	0.000763798
ENSG00000176383	B3GNT4	1.34493	0.000259608
ENSG00000259462	CPEB1-AS1	1.34465	0.0100898
ENSG00000164076	CAMKV	1.34438	0.00197041
ENSG00000109686	SH3D19	1.34339	7.31073e-31
ENSG00000269967		1.34155	0.0138933
ENSG00000131378	RFTN1	1.33899	5.19327e-08
ENSG00000214575	CPEB1	1.32591	1.90889e-12
ENSG00000171126	KCNG3	1.32468	9.80919e-19
ENSG00000100167	SEPTIN3	1.32434	3.78861e-35
ENSG00000196935	SRGAP1	1.32221	1.06676e-25
ENSG00000265972	TXNIP	1.319	0.000902273
ENSG00000137561	TTPA	1.31713	0.00174069
ENSG00000173334	TRIB1	1.31619	1.33397e-23
ENSG00000171357	LURAP1	1.31611	2.45968e-06
ENSG00000178445	GLDC	1.31416	2.77421e-35
ENSG00000238105	GOLGA2P5	1.31271	1.0303e-18
ENSG00000123453	SARDH	1.31242	1.69883e-11
ENSG00000114737	CISH	1.31104	8.78743e-17
ENSG00000105672	ETV2	1.30798	0.0288946
ENSG00000170390	DCLK2	1.30528	3.2943e-08
ENSG00000147813	NAPRT	1.30363	2.23147e-10
ENSG00000113070	HBEGF	1.30168	1.13744e-09
ENSG00000169604	ANTXR1	1.30144	7.55795e-50
ENSG00000108379	WNT3	1.30075	1.56409e-10
ENSG00000196159	FAT4	1.29798	0.000240702
ENSG00000040608	RTN4R	1.29747	2.93743e-07
ENSG00000130066	SAT1	1.29632	4.74809e-10
ENSG00000126391	FRMD8	1.2947	2.72909e-38
ENSG00000166840	GLYATL1	1.29333	0.0310132
ENSG00000067057	PFKP	1.28883	2.05941e-71
ENSG00000166801	FAM111A	1.28843	4.79352e-102
ENSG00000130720	FIBCD1	1.28794	0.0104988
ENSG00000119599	DCAF4	1.28773	1.49503e-10
ENSG00000237517	DGCR5	1.28726	0.037951
ENSG00000124126	PREX1	1.28612	4.61968e-12
ENSG00000099849	RASSF7	1.28572	9.69866e-18
ENSG00000073350	LLGL2	1.28411	8.94848e-17
ENSG00000187583	PLEKHN1	1.28203	2.40149e-08
ENSG00000185615	PDIA2	1.28063	1.88608e-05
ENSG00000237424	FOXD2-AS1	1.27789	0.00145836
ENSG00000276517		1.27345	0.000441023
ENSG00000133131	MORC4	1.27336	2.10569e-26
ENSG00000069974	RAB27A	1.27038	1.35758e-20
ENSG00000167034	NKX3-1	1.26858	0.00527695
ENSG00000285106		1.26601	1.71251e-06
ENSG00000141668	CBLN2	1.26462	1.54008e-156
ENSG00000006740	ARHGAP44	1.26355	2.59735e-12
ENSG00000248971	KRT8P46	1.26271	0.00252591
ENSG00000183092	BEGAIN	1.26142	7.60562e-06
ENSG00000083544	TDRD3	1.25976	5.11486e-72
ENSG00000084092	NOA1	1.25921	3.78688e-43
ENSG00000160972	PPP1R16A	1.25766	2.52495e-49
ENSG00000149781	FERMT3	1.25691	0.0233545
ENSG00000137474	MYO7A	1.25641	2.82866e-05
ENSG00000069812	HES2	1.25031	0.0339005
ENSG00000110400	NECTIN1	1.24992	1.35027e-51
ENSG00000183049	CAMK1D	1.24845	1.28032e-18
ENSG00000145284	SCD5	1.24832	1.4275e-31
ENSG00000105696	TMEM59L	1.24632	9.49771e-06
ENSG00000170049	KCNAB3	1.24484	6.34054e-09
ENSG00000158769	F11R	1.23553	9.86767e-05
ENSG00000150995	ITPR1	1.23515	6.37553e-50
ENSG00000255150	EID3	1.23366	0.00157602
ENSG00000140367	UBE2Q2	1.22893	1.42263e-24
ENSG00000096717	SIRT1	1.22688	1.42302e-79
ENSG00000275734		1.22341	0.0296051
ENSG00000230699		1.22295	2.45051e-06
ENSG00000172671	ZFAND4	1.22287	2.72128e-14
ENSG00000131187	F12	1.22173	8.87643e-18
ENSG00000204839	MROH6	1.21926	2.96205e-09
ENSG00000119915	ELOVL3	1.21923	0.000782885
ENSG00000105717	PBX4	1.21537	0.000263313
ENSG00000101236	RNF24	1.21534	3.46456e-35
ENSG00000197119	SLC25A29	1.20983	6.91959e-30
ENSG00000198353	HOXC4	1.20956	1.27508e-14
ENSG00000221968	FADS3	1.20866	4.06705e-18
ENSG00000106524	ANKMY2	1.20859	2.5162e-31
ENSG00000163686	ABHD6	1.20684	1.04673e-13
ENSG00000105245	NUMBL	1.20534	6.69695e-39
ENSG00000259363		1.20438	0.00548462
ENSG00000105376	ICAM5	1.2041	3.55113e-24
ENSG00000286177		1.2039	0.00725695
ENSG00000099625	CBARP	1.20388	1.40695e-23
ENSG00000135842	NIBAN1	1.20337	1.59365e-16
ENSG00000179750	APOBEC3B	1.19974	3.18315e-16
ENSG00000099338	CATSPERG	1.19927	0.00113234
ENSG00000135605	TEC	1.19614	0.000500494
ENSG00000179111	HES7	1.19344	5.1206e-10
ENSG00000167799	NUDT8	1.19041	7.48561e-06
ENSG00000147364	FBXO25	1.19011	0.00138178
ENSG00000196739	COL27A1	1.18999	1.97647e-24
ENSG00000137766	UNC13C	1.1893	7.98181e-86
ENSG00000160207	HSF2BP	1.18757	0.0125259
ENSG00000150961	SEC24D	1.18601	3.84683e-50
ENSG00000187372	PCDHB13	1.18589	0.00715123
ENSG00000070778	PTPN21	1.18448	1.15053e-12
ENSG00000177685	CRACR2B	1.18237	5.72523e-24
ENSG00000101695	RNF125	1.18232	2.99375e-13
ENSG00000077585	GPR137B	1.17997	2.07213e-15
ENSG00000171867	PRNP	1.17952	6.71557e-37
ENSG00000287707		1.17943	0.000286501
ENSG00000168502	MTCL1	1.17937	2.75291e-20
ENSG00000248383	PCDHAC1	1.17864	1.36248e-05
ENSG00000263535	AK4P1	1.17801	0.000991329
ENSG00000267691	SHC1P2	1.17754	0.0483784
ENSG00000103044	HAS3	1.17713	3.13454e-13
ENSG00000164983	TMEM65	1.1744	4.63307e-08
ENSG00000187730	GABRD	1.17261	0.0181067
ENSG00000119684	MLH3	1.17064	2.04356e-27
ENSG00000184916	JAG2	1.16767	1.8346e-47
ENSG00000233901	LINC01503	1.16762	0.0001017
ENSG00000167779	IGFBP6	1.16549	2.76334e-05
ENSG00000146386	ABRACL	1.16537	4.4755e-10
ENSG00000166016	ABTB2	1.16501	7.81881e-14
ENSG00000276853		1.16411	0.010912
ENSG00000161921	CXCL16	1.16336	1.35286e-29
ENSG00000175806	MSRA	1.16143	1.57672e-08
ENSG00000183248	PRR36	1.16	1.10175e-07
ENSG00000137825	ITPKA	1.1581	2.08186e-22
ENSG00000100068	LRP5L	1.15722	5.1377e-10
ENSG00000099617	EFNA2	1.15554	0.000374064
ENSG00000198517	MAFK	1.15498	8.83911e-25
ENSG00000158050	DUSP2	1.15356	1.57277e-14
ENSG00000058668	ATP2B4	1.15352	9.10267e-55
ENSG00000158458	NRG2	1.15236	0.00500983
ENSG00000198003	CCDC151	1.15055	0.0434638
ENSG00000134508	CABLES1	1.14979	6.53135e-12
ENSG00000160326	SLC2A6	1.14902	5.52268e-10
ENSG00000172197	MBOAT1	1.14656	0.00438981
ENSG00000107859	PITX3	1.14655	0.03485
ENSG00000133195	SLC39A11	1.14571	3.0941e-12
ENSG00000051620	HEBP2	1.14396	1.75073e-11
ENSG00000169926	KLF13	1.14247	1.10454e-49
ENSG00000232973	CYP1B1-AS1	1.14089	2.73803e-06
ENSG00000175105	ZNF654	1.14026	2.25811e-35
ENSG00000142733	MAP3K6	1.13712	1.701e-21
ENSG00000169733	RFNG	1.13675	1.78304e-16
ENSG00000132561	MATN2	1.13492	2.23752e-05
ENSG00000115525	ST3GAL5	1.13462	0.000608616
ENSG00000013288	MAN2B2	1.13277	1.63677e-17
ENSG00000168542	COL3A1	1.13177	7.53293e-217
ENSG00000277972	CISD3	1.13094	4.69009e-19
ENSG00000198682	PAPSS2	1.12931	0.000204901
ENSG00000181826	RELL1	1.12714	4.55448e-21
ENSG00000148948	LRRC4C	1.12598	1.47663e-09
ENSG00000112320	SOBP	1.12545	2.79418e-14
ENSG00000162976	SLC66A3	1.12139	1.22855e-10
ENSG00000166246	C16orf71	1.12105	0.0196134
ENSG00000196507	TCEAL3	1.12087	0.000135386
ENSG00000268798		1.1169	0.0152421
ENSG00000143458	GABPB2	1.11308	4.95829e-29
ENSG00000108786	HSD17B1	1.10885	2.07084e-10
ENSG00000124920	MYRF	1.10791	8.90107e-05
ENSG00000143153	ATP1B1	1.10736	5.553e-06
ENSG00000188385	JAKMIP3	1.10444	0.00179174
ENSG00000205542	TMSB4X	1.10353	8.37688e-28
ENSG00000239455		1.10333	0.0358213
ENSG00000089692	LAG3	1.10268	0.00932369
ENSG00000121316	PLBD1	1.10169	1.06753e-25
ENSG00000069966	GNB5	1.10116	4.20644e-16
ENSG00000177679	SRRM3	1.10061	7.99692e-05
ENSG00000166813	KIF7	1.09954	5.48242e-26
ENSG00000109107	ALDOC	1.09891	6.01694e-12
ENSG00000283122	HYMAI	1.09794	0.0349166
ENSG00000147862	NFIB	1.09771	4.82984e-170
ENSG00000187024	PTRH1	1.0967	4.50156e-16
ENSG00000168811	IL12A	1.09599	0.0098572
ENSG00000065054	SLC9A3R2	1.09572	2.85855e-22
ENSG00000179832	MROH1	1.09496	1.95952e-12
ENSG00000065413	ANKRD44	1.09419	0.000681004
ENSG00000111186	WNT5B	1.09356	0.00681877
ENSG00000145911	N4BP3	1.0922	5.96088e-07
ENSG00000248121	SMURF2P1	1.09128	0.0484827
ENSG00000214922	HLA-F-AS1	1.09039	0.00367792
ENSG00000161681	SHANK1	1.08686	9.55041e-06
ENSG00000111664	GNB3	1.08655	4.2694e-08
ENSG00000025156	HSF2	1.0856	1.75995e-29
ENSG00000164823	OSGIN2	1.08366	3.55615e-56
ENSG00000198715	GLMP	1.08361	2.10257e-09
ENSG00000158747	NBL1	1.08249	4.39081e-22
ENSG00000110076	NRXN2	1.08209	0.00889151
ENSG00000265666	RARA-AS1	1.08184	0.029169
ENSG00000142632	ARHGEF19	1.07902	2.62377e-06
ENSG00000111981	ULBP1	1.07885	0.026109
ENSG00000112294	ALDH5A1	1.07674	6.51441e-22
ENSG00000102109	PCSK1N	1.07482	1.8022e-06
ENSG00000008056	SYN1	1.0738	0.0192117
ENSG00000177888	ZBTB41	1.07235	1.28851e-42
ENSG00000152642	GPD1L	1.0722	3.13238e-22
ENSG00000275832	ARHGAP23	1.07145	6.53201e-05
ENSG00000167641	PPP1R14A	1.07064	2.48781e-06
ENSG00000153029	MR1	1.06998	0.000797948
ENSG00000103742	IGDCC4	1.06938	3.68513e-10
ENSG00000162913	OBSCN-AS1	1.0691	0.00678567
ENSG00000101911	PRPS2	1.06747	1.57786e-55
ENSG00000099814	CEP170B	1.06705	3.00734e-11
ENSG00000164211	STARD4	1.06435	4.11551e-42
ENSG00000177283	FZD8	1.06305	3.97424e-55
ENSG00000121900	TMEM54	1.06084	1.81231e-06
ENSG00000163376	KBTBD8	1.06012	2.09208e-06
ENSG00000109736	MFSD10	1.06007	3.08433e-28
ENSG00000143494	VASH2	1.05785	3.46807e-15
ENSG00000104998	IL27RA	1.05609	2.30153e-28
ENSG00000285637		1.05601	0.0455331
ENSG00000116983	HPCAL4	1.05143	5.9461e-05
ENSG00000115325	DOK1	1.05043	7.67167e-15
ENSG00000160190	SLC37A1	1.04713	0.00144661
ENSG00000185522	LMNTD2	1.04634	0.0362556
ENSG00000074317	SNCB	1.04605	0.034704
ENSG00000123595	RAB9A	1.04438	1.06521e-13
ENSG00000102034	ELF4	1.04304	6.55733e-21
ENSG00000260806		1.0428	0.0342542
ENSG00000174628	IQCK	1.03668	1.57456e-07
ENSG00000142327	RNPEPL1	1.03554	1.97675e-20
ENSG00000226380		1.03491	1.61895e-07
ENSG00000280173		1.03343	9.97412e-06
ENSG00000076716	GPC4	1.03146	1.63969e-12
ENSG00000237854	LINC00674	1.02963	0.0396911
ENSG00000080823	MOK	1.02915	2.91735e-18
ENSG00000167523	SPATA33	1.02864	2.49467e-14
ENSG00000185418	TARS3	1.02733	1.26413e-08
ENSG00000077522	ACTN2	1.02663	1.12869e-06
ENSG00000134780	DAGLA	1.02618	1.67917e-07
ENSG00000188338	SLC38A3	1.02471	0.0018381
ENSG00000226944		1.02406	0.0018364
ENSG00000117245	KIF17	1.02333	1.64407e-07
ENSG00000182809	CRIP2	1.02138	5.23258e-23
ENSG00000116990	MYCL	1.0197	4.36577e-05
ENSG00000131435	PDLIM4	1.01274	2.59664e-05
ENSG00000258732		1.01215	4.39373e-06
ENSG00000278000		1.00544	0.00834525
ENSG00000212607	SNORA3B	1.00334	0.0283576
ENSG00000164403	SHROOM1	1.0029	6.53198e-24
ENSG00000173137	ADCK5	1.0011	7.33195e-06

## Sheet: Table 6
Table 6. Downregulated genes in Acis compared to A2780 (untreated)
gene	gene_name	log2FC	padj
ENSG00000231764	DLX6-AS1	-13.3332	3.97604e-28
ENSG00000091656	ZFHX4	-12.475	1.16546e-24
ENSG00000075891	PAX2	-12.3763	2.82474e-24
ENSG00000081189	MEF2C	-12.3287	4.21499e-24
ENSG00000164692	COL1A2	-11.9398	1.24962e-22
ENSG00000112319	EYA4	-11.9347	1.29631e-22
ENSG00000048052	HDAC9	-11.879	2.16485e-22
ENSG00000285958		-11.7747	4.54637e-22
ENSG00000155719	OTOA	-11.6485	1.4604e-21
ENSG00000128591	FLNC	-11.6089	1.84995e-21
ENSG00000077616	NAALAD2	-11.5795	2.63294e-21
ENSG00000181541	MAB21L2	-11.5617	2.95604e-21
ENSG00000131914	LIN28A	-11.3632	1.35758e-20
ENSG00000153707	PTPRD	-11.3127	2.49405e-20
ENSG00000006377	DLX6	-11.2908	2.71019e-20
ENSG00000105880	DLX5	-11.2818	2.87159e-20
ENSG00000090104	RGS1	-11.2134	5.37007e-20
ENSG00000229807	XIST	-11.1433	1.06331e-64
ENSG00000198796	ALPK2	-11.1049	1.23762e-19
ENSG00000130303	BST2	-11.0664	1.64052e-19
ENSG00000274317	LINC02334	-10.8843	7.40293e-19
ENSG00000180660	MAB21L1	-10.855	7.7677e-19
ENSG00000132854	KANK4	-10.6761	3.72595e-18
ENSG00000197705	KLHL14	-10.6617	4.25752e-18
ENSG00000251095		-10.66	4.17469e-18
ENSG00000170044	ZPLD1	-10.5919	5.92845e-18
ENSG00000133107	TRPC4	-10.5346	9.14619e-18
ENSG00000172318	B3GALT1	-10.4515	2.31764e-17
ENSG00000125398	SOX9	-10.428	2.4579e-17
ENSG00000119946	CNNM1	-10.3158	6.17465e-17
ENSG00000087303	NID2	-10.3121	4.94844e-17
ENSG00000225206	MIR137HG	-10.3057	5.03829e-17
ENSG00000182263	FIGN	-10.3037	1.88583e-22
ENSG00000171189	GRIK1	-10.2948	5.44134e-17
ENSG00000116132	PRRX1	-10.249	9.87791e-17
ENSG00000175567	UCP2	-10.2474	7.566e-17
ENSG00000106477	CEP41	-10.2216	1.1988e-16
ENSG00000134215	VAV3	-10.2069	1.34866e-16
ENSG00000152977	ZIC1	-10.157	7.44728e-22
ENSG00000204381	LAYN	-10.1414	2.10635e-16
ENSG00000129422	MTUS1	-10.1341	2.83362e-32
ENSG00000196482	ESRRG	-10.1038	2.3136e-16
ENSG00000154655	L3MBTL4	-10.0866	3.30101e-16
ENSG00000180318	ALX1	-10.0739	3.66756e-16
ENSG00000150893	FREM2	-10.0525	2.17971e-21
ENSG00000088756	ARHGAP28	-10.0254	5.91853e-42
ENSG00000083067	TRPM3	-10.0114	5.70681e-16
ENSG00000286214		-9.98369	6.47688e-16
ENSG00000184486	POU3F2	-9.96787	5.99299e-16
ENSG00000134343	ANO3	-9.91545	8.01842e-21
ENSG00000148584	A1CF	-9.88076	1.54878e-15
ENSG00000137872	SEMA6D	-9.8547	1.87325e-15
ENSG00000152578	GRIA4	-9.83646	1.66127e-20
ENSG00000141431	ASXL3	-9.83525	2.63818e-50
ENSG00000072657	TRHDE	-9.78414	3.05476e-15
ENSG00000163132	MSX1	-9.78181	2.5814e-20
ENSG00000231205	ZNF826P	-9.76973	3.16771e-15
ENSG00000137752	CASP1	-9.75643	3.29796e-15
ENSG00000047457	CP	-9.75399	3.78309e-15
ENSG00000188641	DPYD	-9.67636	6.22256e-15
ENSG00000145335	SNCA	-9.64634	5.63282e-15
ENSG00000150275	PCDH15	-9.64542	7.71933e-15
ENSG00000172548	NIPAL4	-9.63704	8.07038e-15
ENSG00000163092	XIRP2	-9.63314	9.55628e-15
ENSG00000137868	STRA6	-9.6033	9.88711e-15
ENSG00000224149		-9.57466	1.22396e-14
ENSG00000164938	TP53INP1	-9.52956	1.62714e-14
ENSG00000206432	TMEM200C	-9.52591	1.67383e-14
ENSG00000065833	ME1	-9.49826	2.18285e-14
ENSG00000165379	LRFN5	-9.49703	1.66814e-14
ENSG00000162627	SNX7	-9.48525	2.34959e-14
ENSG00000135333	EPHA7	-9.47511	2.04175e-37
ENSG00000204397	CARD16	-9.38994	3.31656e-14
ENSG00000162631	NTNG1	-9.3792	5.64835e-14
ENSG00000183770	FOXL2	-9.37526	4.27405e-14
ENSG00000166960	CCDC178	-9.37132	4.04e-14
ENSG00000162624	LHX8	-9.36313	1.30531e-18
ENSG00000077943	ITGA8	-9.34006	7.76071e-14
ENSG00000242536		-9.28907	1.01411e-13
ENSG00000138083	SIX3	-9.28467	9.23306e-14
ENSG00000152784	PRDM8	-9.24345	3.70168e-18
ENSG00000254750	CASP1P2	-9.20201	1.86426e-13
ENSG00000185477	GPRIN3	-9.16794	2.5248e-95
ENSG00000101680	LAMA1	-9.16422	6.2355e-35
ENSG00000044524	EPHA3	-9.11027	4.26811e-43
ENSG00000174963	ZIC4	-9.10706	3.08894e-13
ENSG00000138722	MMRN1	-9.07133	4.53968e-13
ENSG00000130707	ASS1	-9.05578	4.23153e-13
ENSG00000086991	NOX4	-9.02899	5.4584e-13
ENSG00000170962	PDGFD	-9.0144	4.18748e-13
ENSG00000255248	MIR100HG	-9.00304	6.70835e-13
ENSG00000158516	CPA2	-9.00157	6.14765e-13
ENSG00000030419	IKZF2	-8.97862	8.86099e-13
ENSG00000117122	MFAP2	-8.95616	5.8342e-13
ENSG00000164093	PITX2	-8.94923	9.15825e-13
ENSG00000173376	NDNF	-8.94132	7.09609e-13
ENSG00000275038		-8.88502	1.50977e-12
ENSG00000172687	ZNF738	-8.86844	1.59845e-12
ENSG00000106034	CPED1	-8.86124	1.12363e-24
ENSG00000148942	SLC5A12	-8.84225	2.11153e-12
ENSG00000213949	ITGA1	-8.83824	1.82658e-24
ENSG00000101417	PXMP4	-8.82462	2.07406e-12
ENSG00000256422	LINC02552	-8.81819	2.27803e-12
ENSG00000100505	TRIM9	-8.8072	2.48264e-12
ENSG00000239922		-8.79739	2.7083e-12
ENSG00000144583	MARCHF4	-8.79689	4.10156e-40
ENSG00000158352	SHROOM4	-8.77686	3.0272e-12
ENSG00000220884	MESTP1	-8.74688	3.3399e-12
ENSG00000163823	CCR1	-8.73956	8.18995e-32
ENSG00000221818	EBF2	-8.65615	7.08311e-12
ENSG00000169550	MUC15	-8.62209	8.51208e-12
ENSG00000196782	MAML3	-8.58806	1.08922e-15
ENSG00000162654	GBP4	-8.58434	1.08763e-11
ENSG00000042781	USH2A	-8.55461	8.45232e-12
ENSG00000137801	THBS1	-8.5424	5.67519e-75
ENSG00000109452	INPP4B	-8.53881	8.11664e-23
ENSG00000240563	L1TD1	-8.5306	1.56438e-11
ENSG00000092421	SEMA6A	-8.52027	1.13808e-59
ENSG00000156284	CLDN8	-8.51013	1.80693e-11
ENSG00000197608	ZNF841	-8.50967	1.87188e-11
ENSG00000164946	FREM1	-8.49505	1.99395e-11
ENSG00000184305	CCSER1	-8.4512	2.55682e-11
ENSG00000237440	ZNF737	-8.41267	2.16198e-11
ENSG00000134765	DSC1	-8.41227	3.85915e-11
ENSG00000235431		-8.38914	4.23221e-11
ENSG00000253496		-8.35757	6.29195e-11
ENSG00000198795	ZNF521	-8.34787	8.59594e-15
ENSG00000122691	TWIST1	-8.34538	4.55847e-36
ENSG00000111859	NEDD9	-8.27267	8.08654e-11
ENSG00000179915	NRXN1	-8.24595	3.40463e-28
ENSG00000149596	JPH2	-8.24282	1.30554e-10
ENSG00000286870		-8.23038	1.04322e-10
ENSG00000073910	FRY	-8.2252	6.75326e-11
ENSG00000004848	ARX	-8.22518	9.62145e-11
ENSG00000176971	FIBIN	-8.20472	8.1502e-35
ENSG00000164438	TLX3	-8.20036	3.87745e-21
ENSG00000112559	MDFI	-8.19957	1.16889e-10
ENSG00000106484	MEST	-8.19282	6.99375e-130
ENSG00000111846	GCNT2	-8.18916	1.35169e-10
ENSG00000105750	ZNF85	-8.14953	1.09323e-10
ENSG00000162873	KLHDC8A	-8.14863	1.52055e-10
ENSG00000169439	SDC2	-8.13061	1.31344e-47
ENSG00000150722	PPP1R1C	-8.10154	2.42825e-10
ENSG00000174469	CNTNAP2	-8.10046	1.4373e-10
ENSG00000270953		-8.09355	2.5427e-10
ENSG00000182168	UNC5C	-8.08095	6.67657e-14
ENSG00000104760	FGL1	-8.067	2.37753e-10
ENSG00000156113	KCNMA1	-8.06654	7.40756e-14
ENSG00000282851	BISPR	-8.06619	2.53099e-10
ENSG00000100234	TIMP3	-8.06574	2.73177e-73
ENSG00000180777	ANKRD30B	-8.05318	3.30025e-10
ENSG00000127074	RGS13	-8.05273	3.11172e-10
ENSG00000128284	APOL3	-8.02424	3.32571e-10
ENSG00000160229	ZNF66	-8.02359	3.54109e-10
ENSG00000067715	SYT1	-8.02174	5.09234e-10
ENSG00000156475	PPP2R2B	-7.9843	4.93382e-10
ENSG00000196440	ARMCX4	-7.97766	5.76743e-10
ENSG00000163359	COL6A3	-7.97228	5.91739e-187
ENSG00000147869	CER1	-7.96687	5.19596e-10
ENSG00000166342	NETO1	-7.95317	5.52704e-10
ENSG00000250927	MESTP3	-7.92573	5.6879e-10
ENSG00000286775		-7.89863	7.98479e-10
ENSG00000185559	DLK1	-7.88234	8.73852e-10
ENSG00000189108	IL1RAPL2	-7.87816	1.90545e-19
ENSG00000174807	CD248	-7.86575	1.39182e-25
ENSG00000157765	SLC34A2	-7.85276	1.16668e-09
ENSG00000147655	RSPO2	-7.85064	4.13527e-13
ENSG00000156282	CLDN17	-7.83778	1.19954e-09
ENSG00000224127		-7.81965	1.14007e-09
ENSG00000046604	DSG2	-7.81547	1.57518e-09
ENSG00000124134	KCNS1	-7.8116	6.80011e-10
ENSG00000248905	FMN1	-7.78783	1.67832e-09
ENSG00000166426	CRABP1	-7.77444	8.13165e-10
ENSG00000253661	ZFHX4-AS1	-7.77189	1.77746e-09
ENSG00000164002	EXO5	-7.76908	8.95428e-10
ENSG00000156011	PSD3	-7.76854	3.62864e-43
ENSG00000287409		-7.73317	2.35641e-09
ENSG00000196954	CASP4	-7.72523	1.11257e-09
ENSG00000256087	ZNF432	-7.70683	2.44236e-09
ENSG00000164220	F2RL2	-7.70152	2.19322e-09
ENSG00000185630	PBX1	-7.69904	1.80867e-18
ENSG00000223770	CACNA2D1-AS1	-7.66574	1.63146e-12
ENSG00000156869	FRRS1	-7.66356	4.58401e-09
ENSG00000101333	PLCB4	-7.6632	3.63285e-09
ENSG00000164929	BAALC	-7.65111	2.30646e-18
ENSG00000275064		-7.62791	4.23199e-09
ENSG00000183908	LRRC55	-7.61278	3.94234e-09
ENSG00000178498	DTX3	-7.60331	2.19469e-09
ENSG00000112837	TBX18	-7.60253	5.86253e-09
ENSG00000134612	FOLH1B	-7.57353	5.58979e-09
ENSG00000169432	SCN9A	-7.56763	4.89623e-207
ENSG00000106829	TLE4	-7.56429	6.3579e-64
ENSG00000286892		-7.55788	4.98713e-35
ENSG00000185008	ROBO2	-7.55042	1.84806e-23
ENSG00000038427	VCAN	-7.52469	3.39601e-108
ENSG00000066032	CTNNA2	-7.51408	4.80208e-12
ENSG00000103522	IL21R	-7.50585	3.82764e-09
ENSG00000171564	FGB	-7.50308	8.84896e-09
ENSG00000168671	UGT3A2	-7.4748	1.15804e-08
ENSG00000157502	PWWP3B	-7.47314	1.78947e-17
ENSG00000253671		-7.47053	1.17559e-08
ENSG00000254819	ANO3-AS1	-7.4668	1.11332e-08
ENSG00000269466	H3Y1	-7.46192	9.21807e-09
ENSG00000258636		-7.45065	1.10459e-08
ENSG00000038945	MSR1	-7.45063	1.49047e-08
ENSG00000197565	COL4A6	-7.43743	6.99223e-09
ENSG00000128709	HOXD9	-7.42228	1.05282e-08
ENSG00000078579	FGF20	-7.4175	7.33961e-09
ENSG00000133401	PDZD2	-7.41247	3.78571e-17
ENSG00000176165	FOXG1	-7.40013	1.749e-08
ENSG00000228592		-7.39102	1.8567e-08
ENSG00000136352	NKX2-1	-7.37926	1.52547e-08
ENSG00000125848	FLRT3	-7.37339	2.85709e-33
ENSG00000223552	CCR5AS	-7.36687	1.53874e-08
ENSG00000183098	GPC6	-7.35605	4.15797e-33
ENSG00000138675	FGF5	-7.35454	3.08715e-22
ENSG00000142538	PTH2	-7.34702	1.749e-08
ENSG00000078596	ITM2A	-7.34076	1.87381e-08
ENSG00000197496	SLC2A10	-7.31816	3.08095e-08
ENSG00000265174		-7.30037	2.28294e-08
ENSG00000249669	CARMN	-7.28329	4.04485e-08
ENSG00000136546	SCN7A	-7.27941	1.74502e-16
ENSG00000125266	EFNB2	-7.26628	1.66007e-08
ENSG00000286422		-7.25483	3.25143e-08
ENSG00000279041		-7.2537	3.76522e-11
ENSG00000173432	SAA1	-7.25128	2.69445e-08
ENSG00000115252	PDE1A	-7.22673	2.89579e-16
ENSG00000228835		-7.22168	4.05927e-08
ENSG00000141526	SLC16A3	-7.21683	4.10775e-11
ENSG00000123572	NRK	-7.21046	7.17897e-125
ENSG00000123095	BHLHE41	-7.19635	2.18906e-08
ENSG00000179630	LACC1	-7.17484	5.54108e-08
ENSG00000077063	CTTNBP2	-7.14557	7.45158e-08
ENSG00000277443	MARCKS	-7.11751	7.13477e-08
ENSG00000184838	PRR16	-7.10013	9.55607e-11
ENSG00000198963	RORB	-7.09726	4.22677e-08
ENSG00000185610	DBX2	-7.09497	9.2502e-08
ENSG00000198774	RASSF9	-7.09277	4.50889e-08
ENSG00000130176	CNN1	-7.09231	7.63529e-31
ENSG00000163297	ANTXR2	-7.0921	1.17428e-10
ENSG00000197415	VEPH1	-7.08867	8.33683e-08
ENSG00000239440	LINC02008	-7.08308	1.06804e-07
ENSG00000124813	RUNX2	-7.08266	2.33208e-35
ENSG00000228222		-7.08022	9.09399e-08
ENSG00000170961	HAS2	-7.07955	5.09315e-08
ENSG00000272419	LINC01145	-7.05978	9.1435e-08
ENSG00000148677	ANKRD1	-7.04286	1.09882e-07
ENSG00000279479		-7.03326	1.70509e-07
ENSG00000168386	FILIP1L	-7.0174	6.1774e-74
ENSG00000147231	RADX	-7.01144	1.30021e-07
ENSG00000141441	GAREM1	-7.00993	4.7217e-20
ENSG00000145087	STXBP5L	-7.00166	1.67917e-07
ENSG00000164756	SLC30A8	-6.99022	2.14298e-10
ENSG00000226067	LINC00623	-6.98923	1.66375e-07
ENSG00000164107	HAND2	-6.98873	6.4365e-08
ENSG00000006747	SCIN	-6.97798	1.72545e-07
ENSG00000157110	RBPMS	-6.97443	2.61424e-97
ENSG00000140481	CCDC33	-6.96837	2.20443e-07
ENSG00000285664		-6.96531	1.53679e-07
ENSG00000111348	ARHGDIB	-6.95806	1.36462e-07
ENSG00000237435	LINC02790	-6.9575	2.35639e-07
ENSG00000177409	SAMD9L	-6.94811	1.91937e-07
ENSG00000121769	FABP3	-6.94115	1.67696e-07
ENSG00000274588	DGKK	-6.93431	2.61704e-07
ENSG00000138771	SHROOM3	-6.93363	1.99656e-52
ENSG00000198223	CSF2RA	-6.92444	2.30557e-07
ENSG00000258084		-6.92262	2.75479e-07
ENSG00000279885		-6.91774	2.83856e-07
ENSG00000139287	TPH2	-6.89904	2.46253e-07
ENSG00000197971	MBP	-6.89622	4.0315e-07
ENSG00000104870	FCGRT	-6.89557	3.49215e-10
ENSG00000229921	KIF25-AS1	-6.89188	1.28538e-07
ENSG00000283740	TAF11L11	-6.88366	2.82682e-07
ENSG00000046889	PREX2	-6.8813	1.30249e-07
ENSG00000050730	TNIP3	-6.87537	3.74569e-07
ENSG00000117228	GBP1	-6.8693	4.17107e-52
ENSG00000183571	PGPEP1L	-6.86279	2.6958e-07
ENSG00000134769	DTNA	-6.85392	1.4203e-07
ENSG00000101017	CD40	-6.85076	2.8776e-07
ENSG00000160791	CCR5	-6.84328	3.72999e-07
ENSG00000135048	CEMIP2	-6.83854	1.62925e-143
ENSG00000163395	IGFN1	-6.82563	1.84832e-14
ENSG00000224294	PINCR	-6.8236	1.76529e-07
ENSG00000122870	BICC1	-6.82291	5.56489e-28
ENSG00000116726	PRAMEF12	-6.81095	5.25993e-07
ENSG00000176046	NUPR1	-6.80834	1.10715e-23
ENSG00000027869	SH2D2A	-6.80438	3.79703e-07
ENSG00000220785	MTMR9LP	-6.79985	4.58606e-07
ENSG00000236333	TRHDE-AS1	-6.78386	3.13362e-23
ENSG00000213976		-6.77893	5.01711e-07
ENSG00000079215	SLC1A3	-6.77594	3.23692e-07
ENSG00000144857	BOC	-6.76912	3.93703e-59
ENSG00000113361	CDH6	-6.76345	2.63613e-07
ENSG00000184302	SIX6	-6.75656	5.35305e-07
ENSG00000165694	FRMD7	-6.75116	5.18809e-07
ENSG00000176840	MIR7-3HG	-6.75087	3.27615e-07
ENSG00000121797	CCRL2	-6.74636	6.02095e-07
ENSG00000177932	ZNF354C	-6.72625	5.60846e-14
ENSG00000164326	CARTPT	-6.69998	6.12427e-07
ENSG00000250387	LINC02197	-6.69538	3.07974e-07
ENSG00000254764	TRIM53CP	-6.69222	8.85215e-07
ENSG00000274265		-6.69074	8.91451e-07
ENSG00000173267	SNCG	-6.68787	1.42841e-09
ENSG00000261213		-6.68476	1.40702e-06
ENSG00000182107	TMEM30B	-6.68108	9.60537e-49
ENSG00000170959	DCDC1	-6.67985	1.76242e-09
ENSG00000072133	RPS6KA6	-6.67955	3.53411e-07
ENSG00000160801	PTH1R	-6.67757	9.08699e-07
ENSG00000082397	EPB41L3	-6.67215	1.86324e-09
ENSG00000187017	ESPN	-6.67047	6.04532e-07
ENSG00000118523	CCN2	-6.66436	4.00855e-31
ENSG00000198785	GRIN3A	-6.66123	7.82481e-40
ENSG00000237523	LINC00857	-6.66115	6.53363e-07
ENSG00000168779	SHOX2	-6.6601	7.89771e-176
ENSG00000183798	EMILIN3	-6.65749	8.48955e-07
ENSG00000164619	BMPER	-6.65199	5.21429e-07
ENSG00000196549	MME	-6.64538	5.52555e-83
ENSG00000248309	MEF2C-AS1	-6.64339	9.08177e-07
ENSG00000102230	PCYT1B	-6.64243	4.62265e-18
ENSG00000106560	GIMAP2	-6.63492	8.80053e-07
ENSG00000164841	TMEM74	-6.63219	9.3362e-07
ENSG00000151364	KCTD14	-6.63126	8.54176e-07
ENSG00000111537	IFNG	-6.61593	9.59981e-07
ENSG00000277147	LINC00869	-6.60469	4.9099e-07
ENSG00000133083	DCLK1	-6.59725	1.99918e-06
ENSG00000147614	ATP6V0D2	-6.58939	1.19586e-06
ENSG00000175414	ARL10	-6.57505	4.42014e-47
ENSG00000116191	RALGPS2	-6.56447	3.92162e-51
ENSG00000184557	SOCS3	-6.56437	5.81099e-69
ENSG00000145681	HAPLN1	-6.52979	2.60581e-21
ENSG00000148082	SHC3	-6.52081	1.96784e-06
ENSG00000237125	HAND2-AS1	-6.51739	2.45165e-06
ENSG00000171291	ZNF439	-6.51629	4.03811e-17
ENSG00000248112		-6.50871	3.31008e-06
ENSG00000135744	AGT	-6.50465	2.22499e-06
ENSG00000105851	PIK3CG	-6.50296	4.41217e-06
ENSG00000111335	OAS2	-6.50215	3.63608e-13
ENSG00000256232	LINC02387	-6.49983	2.09541e-06
ENSG00000163288	GABRB1	-6.49609	2.91007e-06
ENSG00000102359	SRPX2	-6.49522	3.55661e-17
ENSG00000112333	NR2E1	-6.48929	2.12268e-06
ENSG00000239887	C1orf226	-6.4836	1.11799e-06
ENSG00000169908	TM4SF1	-6.47517	8.67956e-07
ENSG00000179399	GPC5	-6.4547	7.0475e-17
ENSG00000248719		-6.43408	3.24783e-06
ENSG00000180532	ZSCAN4	-6.43339	2.93389e-06
ENSG00000170166	HOXD4	-6.43304	3.5852e-06
ENSG00000101460	MAP1LC3A	-6.43164	9.50754e-07
ENSG00000134755	DSC2	-6.43093	9.83257e-09
ENSG00000182050	MGAT4C	-6.42832	5.99602e-06
ENSG00000287708		-6.40877	3.31715e-06
ENSG00000283683	MYOCOS	-6.40741	1.04477e-08
ENSG00000181201	H2BU2P	-6.40709	4.76871e-06
ENSG00000226053	LINC01776	-6.3998	6.45426e-06
ENSG00000272701	MESTIT1	-6.39737	2.41128e-06
ENSG00000176842	IRX5	-6.39286	1.19586e-06
ENSG00000155465	SLC7A7	-6.38201	2.70075e-06
ENSG00000249156	TAF11L12	-6.38115	3.59701e-06
ENSG00000255403		-6.37895	5.37556e-06
ENSG00000144619	CNTN4	-6.37748	4.24042e-06
ENSG00000171843	MLLT3	-6.36646	1.8898e-06
ENSG00000154645	CHODL	-6.36339	1.73059e-06
ENSG00000117226	GBP3	-6.35816	1.34795e-06
ENSG00000269720	CCDC194	-6.35664	2.29386e-06
ENSG00000287477		-6.3233	1.68292e-06
ENSG00000286379		-6.3227	2.05949e-12
ENSG00000278254		-6.31251	8.31472e-06
ENSG00000124429	POF1B	-6.29763	6.3369e-06
ENSG00000134757	DSG3	-6.29571	8.40526e-06
ENSG00000128652	HOXD3	-6.26321	9.93311e-06
ENSG00000174343	CHRNA9	-6.24443	8.99481e-06
ENSG00000109132	PHOX2B	-6.24121	8.40526e-06
ENSG00000198914	POU3F3	-6.23573	7.19756e-06
ENSG00000175879	HOXD8	-6.23346	7.52688e-06
ENSG00000153904	DDAH1	-6.22217	1.76213e-45
ENSG00000255221	CARD17	-6.20504	1.18662e-05
ENSG00000106631	MYL7	-6.20276	5.97863e-06
ENSG00000250386	H3P21	-6.18897	9.44771e-06
ENSG00000152192	POU4F1	-6.18874	1.02582e-05
ENSG00000158270	COLEC12	-6.18316	1.16112e-11
ENSG00000127903	ZNF835	-6.18297	1.6363e-15
ENSG00000116667	C1orf21	-6.17751	4.79273e-06
ENSG00000095627	TDRD1	-6.17005	1.34548e-05
ENSG00000261368		-6.16925	1.66048e-05
ENSG00000263450		-6.16631	1.12013e-05
ENSG00000259946		-6.16619	1.33612e-05
ENSG00000287130		-6.14924	1.66559e-05
ENSG00000040731	CDH10	-6.14852	2.41873e-51
ENSG00000247134		-6.14227	5.80158e-08
ENSG00000196767	POU3F4	-6.1421	1.1832e-05
ENSG00000165949	IFI27	-6.13076	2.21684e-15
ENSG00000061337	LZTS1	-6.11866	4.46533e-29
ENSG00000153822	KCNJ16	-6.1049	2.99175e-05
ENSG00000163520	FBLN2	-6.10256	1.75912e-05
ENSG00000258342		-6.09568	1.61344e-05
ENSG00000259663		-6.09485	1.85406e-11
ENSG00000163053	SLC16A14	-6.0945	1.84548e-05
ENSG00000162670	BRINP3	-6.08912	2.34817e-11
ENSG00000151150	ANK3	-6.08135	1.84355e-286
ENSG00000048540	LMO3	-6.07981	6.88892e-06
ENSG00000122584	NXPH1	-6.07499	2.20896e-05
ENSG00000109705	NKX3-2	-6.06771	5.75331e-06
ENSG00000128510	CPA4	-6.06433	1.82332e-05
ENSG00000234625	LINC00380	-6.05902	2.20485e-05
ENSG00000165349	SLC7A3	-6.0487	8.20794e-08
ENSG00000107242	PIP5K1B	-6.04115	4.04278e-11
ENSG00000105810	CDK6	-6.03282	2.09265e-05
ENSG00000163064	EN1	-6.02954	2.10201e-05
ENSG00000287026		-6.02138	5.77958e-05
ENSG00000245526	LINC00461	-6.02127	5.52968e-05
ENSG00000124440	HIF3A	-6.01637	2.12651e-05
ENSG00000164176	EDIL3	-6.00105	9.8922e-06
ENSG00000113100	CDH9	-6.00082	4.61661e-05
ENSG00000250407		-5.99824	9.07251e-06
ENSG00000100285	NEFH	-5.9961	5.90614e-160
ENSG00000278897		-5.99016	8.59542e-06
ENSG00000172260	NEGR1	-5.96952	3.43779e-05
ENSG00000009694	TENM1	-5.9661	4.81463e-05
ENSG00000003147	ICA1	-5.95992	2.75608e-05
ENSG00000115828	QPCT	-5.95071	3.44002e-05
ENSG00000154451	GBP5	-5.94961	3.46298e-05
ENSG00000225465	RFPL1S	-5.94871	6.88424e-11
ENSG00000186481	ANKRD20A5P	-5.94705	9.75475e-11
ENSG00000163017	ACTG2	-5.94431	1.51934e-07
ENSG00000121895	TMEM156	-5.94362	4.25928e-05
ENSG00000239716		-5.94319	7.09837e-05
ENSG00000129116	PALLD	-5.93778	2.72602e-44
ENSG00000133636	NTS	-5.93644	9.37077e-55
ENSG00000262874	C19orf84	-5.93307	4.11041e-05
ENSG00000248187		-5.92651	3.0157e-05
ENSG00000154263	ABCA10	-5.90834	4.5871e-05
ENSG00000000005	TNMD	-5.90584	3.84219e-05
ENSG00000186867	QRFPR	-5.90389	4.06419e-05
ENSG00000251258	RFPL4B	-5.90108	4.83744e-05
ENSG00000134533	RERG	-5.90049	2.49649e-07
ENSG00000260918		-5.89846	5.23888e-05
ENSG00000016082	ISL1	-5.89603	1.85197e-43
ENSG00000135821	GLUL	-5.89197	1.96365e-17
ENSG00000169507	SLC38A11	-5.88114	5.05396e-05
ENSG00000151224	MAT1A	-5.86986	1.49503e-10
ENSG00000226486	LINC01035	-5.86542	7.28603e-05
ENSG00000179855	GIPC3	-5.86247	6.93741e-05
ENSG00000285922		-5.85771	4.33866e-05
ENSG00000142871	CCN1	-5.85031	3.92521e-83
ENSG00000139219	COL2A1	-5.84602	3.50668e-07
ENSG00000256124	LINC01152	-5.84592	4.65155e-05
ENSG00000234653	LRRTM4-AS1	-5.84503	4.83744e-05
ENSG00000163286	ALPG	-5.83916	9.5517e-05
ENSG00000174080	CTSF	-5.83264	4.10898e-05
ENSG00000169554	ZEB2	-5.83217	2.60737e-05
ENSG00000187068	C3orf70	-5.8197	2.29589e-05
ENSG00000237361	TUSC8	-5.81878	6.0051e-05
ENSG00000110723	EXPH5	-5.81284	2.59664e-05
ENSG00000225156		-5.81269	5.11104e-05
ENSG00000281202	LINC01097	-5.81266	8.07041e-05
ENSG00000285280		-5.80922	3.53228e-10
ENSG00000189253	TRIM64B	-5.7933	7.61958e-05
ENSG00000261504	LINC01686	-5.79184	3.83369e-05
ENSG00000105967	TFEC	-5.78931	7.67571e-05
ENSG00000105246	EBI3	-5.78906	2.13433e-05
ENSG00000257925		-5.78411	2.916e-05
ENSG00000188042	ARL4C	-5.78331	3.89187e-10
ENSG00000134853	PDGFRA	-5.77845	1.61297e-160
ENSG00000115290	GRB14	-5.77819	5.39538e-10
ENSG00000162669	HFM1	-5.77595	2.96774e-05
ENSG00000099250	NRP1	-5.77537	5.72423e-16
ENSG00000204131	NHSL2	-5.77385	4.84091e-79
ENSG00000257951		-5.76926	0.000120044
ENSG00000251381	LINC00958	-5.76423	0.000103003
ENSG00000138136	LBX1	-5.76347	6.30765e-05
ENSG00000170989	S1PR1	-5.76175	2.93507e-13
ENSG00000258216		-5.73184	4.45578e-05
ENSG00000150625	GPM6A	-5.71274	7.37887e-93
ENSG00000108018	SORCS1	-5.71266	0.000102281
ENSG00000008517	IL32	-5.71059	6.67525e-05
ENSG00000110446	SLC15A3	-5.69604	3.2682e-22
ENSG00000108821	COL1A1	-5.69147	1.42038e-132
ENSG00000111913	RIPOR2	-5.68581	4.46518e-05
ENSG00000229557	LINC00379	-5.68075	0.000343681
ENSG00000006128	TAC1	-5.68038	0.000116882
ENSG00000132274	TRIM22	-5.67837	4.00137e-05
ENSG00000277610	RNVU1-4	-5.67767	0.000208586
ENSG00000151067	CACNA1C	-5.67661	1.11087e-15
ENSG00000137573	SULF1	-5.67181	6.48659e-05
ENSG00000186960	LINC01551	-5.66902	0.000139433
ENSG00000167414	GNG8	-5.66709	6.89435e-05
ENSG00000223804		-5.66541	8.45343e-05
ENSG00000175591	P2RY2	-5.65642	0.000121695
ENSG00000233557	NFU1P2	-5.65186	0.000219387
ENSG00000281103	TRG-AS1	-5.64498	0.000174746
ENSG00000145147	SLIT2	-5.63057	0
ENSG00000140323	DISP2	-5.62519	1.32206e-06
ENSG00000274238		-5.62162	0.000485375
ENSG00000274020	LINC01138	-5.6213	8.89647e-07
ENSG00000180440	SERTM1	-5.62118	0.00017374
ENSG00000234899	SOX9-AS1	-5.61751	0.000153409
ENSG00000010030	ETV7	-5.61533	0.000138703
ENSG00000086289	EPDR1	-5.60882	0.0001087
ENSG00000266970		-5.60837	0.00012052
ENSG00000288037		-5.60697	0.000140221
ENSG00000164604	GPR85	-5.60484	0.000138725
ENSG00000183837	PNMA3	-5.60366	3.73436e-05
ENSG00000151490	PTPRO	-5.58877	2.5527e-09
ENSG00000148700	ADD3	-5.57887	4.61929e-38
ENSG00000228247	UBBP2	-5.5765	0.000156884
ENSG00000168621	GDNF	-5.57641	0.000148753
ENSG00000130590	SAMD10	-5.54229	2.55235e-09
ENSG00000147027	TMEM47	-5.53032	7.43508e-52
ENSG00000267642		-5.52892	0.000318249
ENSG00000225950	NTF4	-5.52565	1.91324e-06
ENSG00000169245	CXCL10	-5.52184	0.000225541
ENSG00000164251	F2RL1	-5.51611	8.73258e-05
ENSG00000176136	MC5R	-5.51437	0.000268679
ENSG00000282057		-5.51315	3.11552e-09
ENSG00000105550	FGF21	-5.51072	0.000220959
ENSG00000228157		-5.50985	9.83315e-05
ENSG00000271811		-5.50678	0.000274601
ENSG00000042062	RIPOR3	-5.50461	0.000221815
ENSG00000254349	MIR2052HG	-5.4973	0.000288901
ENSG00000121690	DEPDC7	-5.49496	8.08945e-05
ENSG00000187726	DNAJB13	-5.494	2.06922e-06
ENSG00000173269	MMRN2	-5.49398	7.42314e-05
ENSG00000154736	ADAMTS5	-5.49261	1.52775e-08
ENSG00000162496	DHRS3	-5.48571	6.35523e-12
ENSG00000154265	ABCA5	-5.48288	6.7013e-28
ENSG00000170689	HOXB9	-5.47415	4.18388e-45
ENSG00000288089		-5.47299	0.000270082
ENSG00000166407	LMO1	-5.47231	3.78674e-17
ENSG00000152591	DSPP	-5.46624	0.00013118
ENSG00000254702		-5.46513	0.000238119
ENSG00000211445	GPX3	-5.46125	0.000202352
ENSG00000148848	ADAM12	-5.45581	0.000314841
ENSG00000280385		-5.45301	0.000128333
ENSG00000172995	ARPP21	-5.43977	0.000457479
ENSG00000138670	RASGEF1B	-5.43104	0.000406298
ENSG00000143320	CRABP2	-5.42536	1.53672e-69
ENSG00000163694	RBM47	-5.41939	2.22475e-16
ENSG00000182053	TRIM49B	-5.41689	0.000370334
ENSG00000276107		-5.41681	0.000342418
ENSG00000258274		-5.41262	0.000247348
ENSG00000170439	METTL7B	-5.41162	6.77462e-17
ENSG00000286202		-5.41146	0.000431785
ENSG00000167654	ATCAY	-5.4101	0.000614004
ENSG00000100628	ASB2	-5.40979	0.000510399
ENSG00000172969	FRG2C	-5.40747	0.000304838
ENSG00000248228	SLIT2-IT1	-5.40614	5.40748e-06
ENSG00000120658	ENOX1	-5.40306	0.000406336
ENSG00000270069	MIR222HG	-5.39577	2.61608e-06
ENSG00000168348	INSM2	-5.39405	0.00033786
ENSG00000115232	ITGA4	-5.39054	0.000158471
ENSG00000227716		-5.38436	0.000175574
ENSG00000152583	SPARCL1	-5.37053	4.55767e-06
ENSG00000121966	CXCR4	-5.36564	0.000269136
ENSG00000278177		-5.36413	0.000263001
ENSG00000237194	SNAI1P1	-5.36129	0.000429103
ENSG00000198807	PAX9	-5.36046	2.81086e-16
ENSG00000205442	IZUMO3	-5.35746	0.000535742
ENSG00000187210	GCNT1	-5.3571	0.000506562
ENSG00000277269		-5.3558	0.000649985
ENSG00000257237		-5.35577	0.000545388
ENSG00000018236	CNTN1	-5.35306	0.000493256
ENSG00000143340	FAM163A	-5.3499	0.000421497
ENSG00000151967	SCHIP1	-5.34849	0.000635756
ENSG00000162645	GBP2	-5.34526	0.000688758
ENSG00000161405	IKZF3	-5.34092	4.16241e-11
ENSG00000188386	PPP3R2	-5.33676	0.00119343
ENSG00000236536		-5.31152	0.000448864
ENSG00000215004	MESTP4	-5.31022	0.000163908
ENSG00000174740	PABPC5	-5.3043	0.00039464
ENSG00000116194	ANGPTL1	-5.30328	0.000459615
ENSG00000235268	KDM4E	-5.29919	0.000618394
ENSG00000204282	TNRC6C-AS1	-5.29771	0.000504329
ENSG00000233922	LINC01694	-5.28837	0.000227929
ENSG00000278055		-5.28478	0.00108586
ENSG00000128655	PDE11A	-5.28021	0.00060686
ENSG00000113327	GABRG2	-5.27913	0.000927098
ENSG00000049089	COL9A2	-5.26507	0.000186331
ENSG00000147144	CCDC120	-5.26434	1.0749e-15
ENSG00000248544		-5.26215	0.00121716
ENSG00000099256	PRTFDC1	-5.25392	0.000657582
ENSG00000180881	CAPS2	-5.25202	0.000632045
ENSG00000176884	GRIN1	-5.24541	0.000552711
ENSG00000223685	LINC00571	-5.23867	0.000215952
ENSG00000057657	PRDM1	-5.23774	0.000290479
ENSG00000110680	CALCA	-5.23703	0.000448677
ENSG00000188738	FSIP2	-5.23571	0.00131537
ENSG00000175471	MCTP1	-5.23272	0.000758422
ENSG00000235505	CASP17P	-5.22773	0.00102768
ENSG00000271075		-5.22526	0.000615564
ENSG00000092969	TGFB2	-5.22351	1.06398e-05
ENSG00000182447	OTOL1	-5.22111	0.00115574
ENSG00000271860		-5.20752	1.3806e-05
ENSG00000166394	CYB5R2	-5.19713	1.78543e-10
ENSG00000248975		-5.19338	0.000897222
ENSG00000243620		-5.1883	0.000848346
ENSG00000136014	USP44	-5.18758	0.000701425
ENSG00000228906		-5.1797	0.000676483
ENSG00000254109	RBPMS-AS1	-5.17863	0.000228405
ENSG00000154553	PDLIM3	-5.17762	0.00116005
ENSG00000110693	SOX6	-5.17534	1.66154e-05
ENSG00000128710	HOXD10	-5.1741	0.000715332
ENSG00000227121	LINC02672	-5.17395	0.000267672
ENSG00000173208	ABCD2	-5.17238	0.000745296
ENSG00000255794	RMST	-5.1719	0.000436579
ENSG00000261645	DISC1FP1	-5.17102	0.00119068
ENSG00000197406	DIO3	-5.17092	0.000639694
ENSG00000138131	LOXL4	-5.16847	1.45357e-05
ENSG00000113396	SLC27A6	-5.16638	0.000715
ENSG00000189348	FAM90A27P	-5.16607	0.00104588
ENSG00000138119	MYOF	-5.16555	2.61309e-34
ENSG00000169903	TM4SF4	-5.16468	0.000916144
ENSG00000171560	FGA	-5.16458	0.00100813
ENSG00000174749	FAM241A	-5.16251	0.000331317
ENSG00000067141	NEO1	-5.16228	1.2325e-145
ENSG00000104213	PDGFRL	-5.16	5.25887e-27
ENSG00000270641	TSIX	-5.15654	0.000934385
ENSG00000231566	LINC02595	-5.1423	1.67974e-05
ENSG00000043355	ZIC2	-5.13987	0.000301708
ENSG00000104447	TRPS1	-5.13849	9.27798e-207
ENSG00000165029	ABCA1	-5.13247	1.36963e-61
ENSG00000135824	RGS8	-5.128	0.00315966
ENSG00000124788	ATXN1	-5.1229	0.00198481
ENSG00000254951		-5.12279	0.000493575
ENSG00000228639	ROCR	-5.12118	0.00101463
ENSG00000163032	VSNL1	-5.1185	0.000819334
ENSG00000165323	FAT3	-5.1175	0.000545388
ENSG00000138772	ANXA3	-5.11167	0.00127619
ENSG00000173578	XCR1	-5.10934	0.000963922
ENSG00000021355	SERPINB1	-5.10884	0.00370465
ENSG00000213424	KRT222	-5.10833	0.00165534
ENSG00000018625	ATP1A2	-5.10673	0.0018364
ENSG00000248329	APELA	-5.1064	0.00107094
ENSG00000282816		-5.09528	0.00112409
ENSG00000144821	MYH15	-5.09525	2.11111e-12
ENSG00000248568	KRT8P48	-5.09334	0.00141063
ENSG00000154162	CDH12	-5.09324	1.26551e-09
ENSG00000240065	PSMB9	-5.08461	1.19339e-33
ENSG00000064763	FAR2	-5.08071	1.24028e-23
ENSG00000272405		-5.07778	4.77969e-10
ENSG00000184719	RNLS	-5.07453	2.519e-05
ENSG00000249167	SEMA6A-AS2	-5.06604	0.00183205
ENSG00000103485	QPRT	-5.06347	1.52657e-68
ENSG00000164128	NPY1R	-5.06016	0.00236611
ENSG00000186472	PCLO	-5.04697	1.26183e-07
ENSG00000165246	NLGN4Y	-5.04523	0.00250573
ENSG00000259920		-5.04407	0.000843135
ENSG00000264151		-5.04143	0.0030129
ENSG00000116690	PRG4	-5.03363	0.00146514
ENSG00000261308	FIGNL2	-5.03201	0.00146514
ENSG00000242574	HLA-DMB	-5.03199	0.00167248
ENSG00000151834	GABRA2	-5.03192	0.00282529
ENSG00000137968	SLC44A5	-5.02813	0.00199452
ENSG00000165966	PDZRN4	-5.02668	0.00238545
ENSG00000253985		-5.02407	0.00348812
ENSG00000100311	PDGFB	-5.02275	3.8856e-05
ENSG00000250360		-5.02007	0.00141318
ENSG00000259639		-5.00911	0.0028029
ENSG00000167614	TTYH1	-5.00084	2.69533e-05
ENSG00000108984	MAP2K6	-4.99722	3.44953e-193
ENSG00000076770	MBNL3	-4.99357	2.53445e-18
ENSG00000164744	SUN3	-4.99104	0.000616686
ENSG00000147255	IGSF1	-4.98711	0.0032407
ENSG00000245384	CXXC4-AS1	-4.98653	2.72769e-07
ENSG00000257194		-4.98507	0.000714344
ENSG00000254987		-4.98174	0.00235157
ENSG00000072041	SLC6A15	-4.97576	0.00221558
ENSG00000280649		-4.97535	0.00173424
ENSG00000250846	EPHA5-AS1	-4.97072	0.00321025
ENSG00000132872	SYT4	-4.96528	0.000762889
ENSG00000277695		-4.96484	0.00405976
ENSG00000154262	ABCA6	-4.96329	0.00324478
ENSG00000204851	PNMA8B	-4.96179	0.000557783
ENSG00000183690	EFHC2	-4.96059	0.00130211
ENSG00000112182	BACH2	-4.95966	0.00511586
ENSG00000282864		-4.95702	0.00116646
ENSG00000152208	GRID2	-4.95662	0.00545821
ENSG00000078018	MAP2	-4.95427	7.27263e-37
ENSG00000205336	ADGRG1	-4.95068	3.79696e-07
ENSG00000225706	PTPRD-AS1	-4.94983	0.00188303
ENSG00000146700	SSC4D	-4.94771	0.00060276
ENSG00000145390	USP53	-4.93937	4.234e-24
ENSG00000151789	ZNF385D	-4.93925	4.24418e-07
ENSG00000225815		-4.93855	0.00406962
ENSG00000265944	LINC01387	-4.93847	0.00235206
ENSG00000280081	LINC01667	-4.92215	0.000710574
ENSG00000187323	DCC	-4.92097	0.00337637
ENSG00000272622		-4.91932	0.000688982
ENSG00000139269	INHBE	-4.91358	3.28721e-31
ENSG00000187815	ZFP69	-4.91269	6.75958e-20
ENSG00000280118		-4.9047	0.0022641
ENSG00000128683	GAD1	-4.90128	4.28843e-09
ENSG00000117525	F3	-4.88275	0.000504381
ENSG00000119547	ONECUT2	-4.88218	9.88362e-90
ENSG00000259558	MESTP2	-4.87814	0.0029823
ENSG00000268964	ERVV-2	-4.87814	0.00301856
ENSG00000234311		-4.87705	0.000871592
ENSG00000133392	MYH11	-4.87696	5.24852e-05
ENSG00000163762	TM4SF18	-4.87555	0.000764289
ENSG00000187172	BAGE2	-4.87444	0.00298892
ENSG00000162951	LRRTM1	-4.87403	0.00295219
ENSG00000276542		-4.87399	0.00462279
ENSG00000106991	ENG	-4.87256	0.00305959
ENSG00000266256	LINC00683	-4.87169	0.00092068
ENSG00000123700	KCNJ2	-4.86603	1.78759e-44
ENSG00000243953		-4.85798	0.00333089
ENSG00000156427	FGF18	-4.85323	4.86467e-34
ENSG00000135074	ADAM19	-4.8515	9.14486e-89
ENSG00000163565	IFI16	-4.84558	0.00091246
ENSG00000204264	PSMB8	-4.84199	0.000564728
ENSG00000249690		-4.84031	0.0011202
ENSG00000127831	VIL1	-4.84023	0.0010482
ENSG00000111728	ST8SIA1	-4.83303	0.00119652
ENSG00000104369	JPH1	-4.83144	1.41255e-39
ENSG00000043591	ADRB1	-4.82978	0.0012552
ENSG00000179059	ZFP42	-4.82615	0.0010465
ENSG00000133169	BEX1	-4.82418	0.000842096
ENSG00000126950	TMEM35A	-4.82368	0.00116307
ENSG00000115183	TANC1	-4.82318	1.89261e-176
ENSG00000131203	IDO1	-4.8212	0.00240658
ENSG00000164197	RNF180	-4.81228	8.48623e-07
ENSG00000115423	DNAH6	-4.80537	0.00495303
ENSG00000147481	SNTG1	-4.80145	0.00663681
ENSG00000142609	CFAP74	-4.79915	0.00143942
ENSG00000123096	SSPN	-4.79876	0.00507132
ENSG00000184408	KCND2	-4.79353	0.0011258
ENSG00000249857		-4.79205	0.00555787
ENSG00000287913		-4.78418	0.00130154
ENSG00000251751	RN7SKP46	-4.77825	0.0077374
ENSG00000184226	PCDH9	-4.77308	1.38761e-183
ENSG00000258536	FKBP1BP1	-4.77107	0.0135993
ENSG00000107796	ACTA2	-4.76544	3.60016e-111
ENSG00000162989	KCNJ3	-4.75597	0.00214963
ENSG00000113790	EHHADH	-4.74878	0.00172031
ENSG00000197977	ELOVL2	-4.74433	0.0016778
ENSG00000136449	MYCBPAP	-4.74002	0.00550957
ENSG00000249620	H3P18	-4.73808	0.0042537
ENSG00000133110	POSTN	-4.73735	0
ENSG00000286454		-4.72909	0.00691432
ENSG00000049192	ADAMTS6	-4.72325	2.20216e-48
ENSG00000199043	MIR335	-4.72178	0.00613139
ENSG00000280007		-4.71849	0.00330328
ENSG00000266441		-4.7171	0.00452429
ENSG00000022355	GABRA1	-4.71709	0.00694637
ENSG00000185666	SYN3	-4.71471	0.00511484
ENSG00000274578		-4.71056	0.00790295
ENSG00000237137		-4.70861	0.00409617
ENSG00000133321	PLAAT4	-4.70804	1.48371e-08
ENSG00000094755	GABRP	-4.7042	0.00424551
ENSG00000249464	LINC01091	-4.69557	1.65568e-47
ENSG00000137558	PI15	-4.68822	0
ENSG00000111674	ENO2	-4.6821	2.84173e-14
ENSG00000012223	LTF	-4.68055	0.00737718
ENSG00000120068	HOXB8	-4.67098	7.02014e-18
ENSG00000287374		-4.67022	0.00878442
ENSG00000177508	IRX3	-4.66618	2.35745e-08
ENSG00000134548	SPX	-4.66415	0.000130204
ENSG00000116016	EPAS1	-4.658	2.55556e-06
ENSG00000249945		-4.65133	0.00180911
ENSG00000279161		-4.63855	0.00150045
ENSG00000232164	LINC01873	-4.63644	0.00950271
ENSG00000204478	PRAMEF20	-4.63557	0.00729865
ENSG00000274297		-4.62766	0.000189332
ENSG00000227342	LINC00307	-4.62663	0.010269
ENSG00000172915	NBEA	-4.62559	1.654e-120
ENSG00000260123		-4.62347	0.00835793
ENSG00000279973		-4.62332	0.00725539
ENSG00000221963	APOL6	-4.6221	6.8798e-149
ENSG00000101938	CHRDL1	-4.62122	0.00873531
ENSG00000261739	GOLGA8S	-4.61902	0.0134534
ENSG00000185885	IFITM1	-4.61778	1.61029e-30
ENSG00000261211		-4.61672	0.00490401
ENSG00000198929	NOS1AP	-4.61672	5.20408e-06
ENSG00000284306	SSU72P2	-4.61665	0.00749529
ENSG00000178882	RFLNA	-4.61618	0.00644982
ENSG00000116985	BMP8B	-4.61616	0.00264744
ENSG00000165617	DACT1	-4.61199	0.00579811
ENSG00000259594		-4.61184	0.00649554
ENSG00000196126	HLA-DRB1	-4.60986	0.00477315
ENSG00000204021	LIPK	-4.60899	0.0101632
ENSG00000169876	MUC17	-4.60754	0.00644784
ENSG00000174145	NWD2	-4.60709	0.00799219
ENSG00000249685		-4.60505	0.00231178
ENSG00000237975	FLG-AS1	-4.60493	0.00285675
ENSG00000196502	SULT1A1	-4.60449	0.00148622
ENSG00000267365	KCNJ2-AS1	-4.60325	0.00560267
ENSG00000287425		-4.60307	0.00588472
ENSG00000180422	LINC00304	-4.60306	0.00198236
ENSG00000105398	SULT2A1	-4.6016	0.00938563
ENSG00000223638	RFPL4A	-4.60146	0.00819447
ENSG00000163235	TGFA	-4.59948	0.00888056
ENSG00000258387		-4.59634	0.0113652
ENSG00000175868	CALCB	-4.59538	0.00259602
ENSG00000228566		-4.59531	4.08295e-08
ENSG00000143603	KCNN3	-4.5943	0.00277434
ENSG00000245694	CRNDE	-4.59404	3.54964e-06
ENSG00000181449	SOX2	-4.59066	0.0106707
ENSG00000169621	APLF	-4.57728	0.000230486
ENSG00000121005	CRISPLD1	-4.57716	1.45798e-49
ENSG00000162738	VANGL2	-4.57617	1.47361e-73
ENSG00000081026	MAGI3	-4.5712	1.33243e-30
ENSG00000245598	DACT3-AS1	-4.56596	0.00250262
ENSG00000134532	SOX5	-4.56128	8.63874e-06
ENSG00000118113	MMP8	-4.56053	5.21178e-13
ENSG00000196668	LINC00173	-4.55304	5.73001e-06
ENSG00000279384		-4.54922	0.0072404
ENSG00000286932		-4.54893	0.0053268
ENSG00000285934		-4.54467	0.0123605
ENSG00000268799	H3Y2	-4.54352	0.00970005
ENSG00000144649	GASK1A	-4.5416	0.0107581
ENSG00000068976	PYGM	-4.5388	4.60663e-20
ENSG00000180066	LINC02870	-4.53849	6.47021e-08
ENSG00000163545	NUAK2	-4.53669	5.05891e-41
ENSG00000092929	UNC13D	-4.53585	0.00409151
ENSG00000176907	TCIM	-4.53305	0.0105011
ENSG00000213468	FIRRE	-4.5269	6.18147e-20
ENSG00000254346	MTND1P6	-4.52646	0.0172536
ENSG00000274500		-4.52609	0.0128205
ENSG00000143473	KCNH1	-4.52599	0.0119659
ENSG00000183625	CCR3	-4.52091	0.00929678
ENSG00000214295	FOXO1B	-4.52071	0.00707072
ENSG00000133101	CCNA1	-4.51865	0.0156226
ENSG00000162599	NFIA	-4.51577	0.00797411
ENSG00000229415	SFTA3	-4.51537	0.0176498
ENSG00000079385	CEACAM1	-4.50991	8.57816e-08
ENSG00000162981	LRATD1	-4.50981	0.0138933
ENSG00000229292	RFPL4AL1	-4.50768	0.0163889
ENSG00000140937	CDH11	-4.50737	0.0134113
ENSG00000111536	IL26	-4.506	0.00868217
ENSG00000120952	PRAMEF2	-4.50593	0.00887995
ENSG00000186088	GSAP	-4.50401	0.0202737
ENSG00000186197	EDARADD	-4.50372	0.000455085
ENSG00000198842	DUSP27	-4.50262	0.012303
ENSG00000258828	KRT8P2	-4.50158	0.0184258
ENSG00000269926	DDIT4-AS1	-4.5	0.00485943
ENSG00000123570	RAB9B	-4.49998	0.00726231
ENSG00000154080	CHST9	-4.49931	0.00381158
ENSG00000143217	NECTIN4	-4.49276	0.00552193
ENSG00000182853	VMO1	-4.48785	1.7933e-37
ENSG00000172817	CYP7B1	-4.48762	0.0193846
ENSG00000172572	PDE3A	-4.48217	1.82447e-07
ENSG00000113721	PDGFRB	-4.47443	1.1568e-15
ENSG00000183801	OLFML1	-4.47399	2.93005e-35
ENSG00000255396		-4.4711	0.000550018
ENSG00000071909	MYO3B	-4.45775	0.0229832
ENSG00000089127	OAS1	-4.45359	0.00375997
ENSG00000163431	LMOD1	-4.44867	4.94225e-09
ENSG00000253944		-4.44585	0.00965184
ENSG00000139330	KERA	-4.44552	0.00452664
ENSG00000276410	H2BC3	-4.44229	2.67511e-05
ENSG00000105825	TFPI2	-4.43616	0.000485375
ENSG00000278811	LINC00624	-4.4313	0.00517994
ENSG00000258733	LINC02328	-4.43063	0.0102802
ENSG00000260314	MRC1	-4.42484	0.0239082
ENSG00000256980	KHDC1L	-4.42334	0.0124073
ENSG00000186529	CYP4F3	-4.42169	0.0193836
ENSG00000171714	ANO5	-4.42111	1.01399e-08
ENSG00000117091	CD48	-4.42088	0.0179414
ENSG00000143226	FCGR2A	-4.419	0.0198723
ENSG00000233251		-4.41871	0.0160358
ENSG00000112280	COL9A1	-4.41852	0.0141783
ENSG00000052850	ALX4	-4.41788	1.42509e-08
ENSG00000178567	EPM2AIP1	-4.41763	0.0116036
ENSG00000166405	RIC3	-4.4173	4.8281e-21
ENSG00000101638	ST8SIA5	-4.41502	0.0100136
ENSG00000280157		-4.41388	0.00424211
ENSG00000128918	ALDH1A2	-4.41279	4.24246e-07
ENSG00000176204	LRRTM4	-4.41213	7.755e-108
ENSG00000253154		-4.41014	0.0167196
ENSG00000091664	SLC17A6	-4.40595	0.000595589
ENSG00000171951	SCG2	-4.40441	0.0254803
ENSG00000129521	EGLN3	-4.4032	0.00272434
ENSG00000132554	RGS22	-4.40226	0.0159596
ENSG00000248538		-4.40175	7.95728e-27
ENSG00000184384	MAML2	-4.40154	4.61689e-07
ENSG00000111305	GSG1	-4.4012	0.000399266
ENSG00000184613	NELL2	-4.40078	1.49093e-21
ENSG00000146411	SLC2A12	-4.40054	0.00921834
ENSG00000205413	SAMD9	-4.39966	0.012364
ENSG00000077092	RARB	-4.39847	0.0202012
ENSG00000163637	PRICKLE2	-4.38997	0.0183387
ENSG00000135423	GLS2	-4.38925	0.00579222
ENSG00000166482	MFAP4	-4.3881	0.0137136
ENSG00000110848	CD69	-4.38697	0.0197725
ENSG00000278972		-4.3853	0.00550957
ENSG00000106025	TSPAN12	-4.37799	1.07452e-16
ENSG00000147573	TRIM55	-4.36711	0.00468674
ENSG00000132530	XAF1	-4.36393	2.56771e-29
ENSG00000176697	BDNF	-4.3621	4.33755e-07
ENSG00000163661	PTX3	-4.34612	0.000608312
ENSG00000143344	RGL1	-4.3208	2.85709e-33
ENSG00000146373	RNF217	-4.31824	2.72128e-14
ENSG00000248185		-4.30922	0.0120778
ENSG00000204789	ZNF204P	-4.30879	1.95465e-05
ENSG00000251573	LINC02106	-4.3037	0.011951
ENSG00000143036	SLC44A3	-4.30196	0.0193939
ENSG00000271615	ACTG1P22	-4.30098	8.90411e-07
ENSG00000231969	MMADHC-DT	-4.2977	0.00539317
ENSG00000168702	LRP1B	-4.29655	3.87515e-11
ENSG00000215559	ANKRD20A11P	-4.29636	0.0164395
ENSG00000236266		-4.2935	0.0102214
ENSG00000277586	NEFL	-4.29287	2.61795e-34
ENSG00000179542	SLITRK4	-4.29276	0.0265385
ENSG00000287254		-4.29114	0.0104342
ENSG00000278873		-4.29015	0.0482194
ENSG00000206384	COL6A6	-4.28993	0.0240038
ENSG00000144406	UNC80	-4.2898	0.0269577
ENSG00000260103		-4.28957	0.0080612
ENSG00000248746	ACTN3	-4.28951	9.35382e-133
ENSG00000273821		-4.285	0.0087905
ENSG00000246820	RIC3-DT	-4.28437	0.0219063
ENSG00000260742		-4.28035	0.0143567
ENSG00000287020		-4.28021	0.0272017
ENSG00000283294		-4.27835	0.020185
ENSG00000135447	PPP1R1A	-4.27517	0.0221693
ENSG00000254897		-4.27116	0.0286951
ENSG00000242265	PEG10	-4.26968	1.11589e-06
ENSG00000127824	TUBA4A	-4.26748	0.00458542
ENSG00000165496	RPL10L	-4.26601	0.0222492
ENSG00000101493	ZNF516	-4.26412	3.643e-198
ENSG00000172264	MACROD2	-4.25573	0.0459578
ENSG00000067066	SP100	-4.25566	1.28765e-41
ENSG00000285336		-4.25328	0.0357988
ENSG00000280374		-4.25054	0.00895269
ENSG00000161835	GRASP	-4.2457	1.90517e-11
ENSG00000139174	PRICKLE1	-4.23815	6.21673e-08
ENSG00000226887	ERVMER34-1	-4.23109	1.11264e-12
ENSG00000183378	OVCH2	-4.22056	0.00182566
ENSG00000120549	KIAA1217	-4.21911	8.67618e-08
ENSG00000130876	SLC7A10	-4.21317	0.0066647
ENSG00000183114	FAM43B	-4.2091	0.00662842
ENSG00000174576	NPAS4	-4.20774	0.00116639
ENSG00000081138	CDH7	-4.20733	0.00966626
ENSG00000279299		-4.2035	0.0356633
ENSG00000275155		-4.20271	0.00832339
ENSG00000283408	MIR548A1HG	-4.20233	0.0296197
ENSG00000185339	TCN2	-4.19997	0.00791681
ENSG00000271474		-4.19947	0.0356735
ENSG00000220184	HMGB3P18	-4.1973	0.00760221
ENSG00000225096		-4.19717	0.00784062
ENSG00000261949	GFY	-4.19644	3.7322e-35
ENSG00000261379		-4.19587	0.0114383
ENSG00000189350	TOGARAM2	-4.1936	0.0085832
ENSG00000218336	TENM3	-4.193	0.00976743
ENSG00000204481	PRAMEF14	-4.19195	0.0278142
ENSG00000231389	HLA-DPA1	-4.18941	0.00114341
ENSG00000124875	CXCL6	-4.18628	0.0318471
ENSG00000144015	TRIM43	-4.1858	0.0353863
ENSG00000286293		-4.18298	0.0421809
ENSG00000145242	EPHA5	-4.17749	1.10985e-14
ENSG00000136750	GAD2	-4.17571	0.0237506
ENSG00000183644	C11orf88	-4.17547	0.0202848
ENSG00000288025		-4.17479	0.0138472
ENSG00000128714	HOXD13	-4.17283	0.0259659
ENSG00000243978	RTL9	-4.17198	0.0177702
ENSG00000272463		-4.16985	0.034704
ENSG00000265217		-4.16984	0.0283607
ENSG00000106013	ANKRD7	-4.16626	0.0233162
ENSG00000121318	TAS2R10	-4.16624	0.0237606
ENSG00000155269	GPR78	-4.16592	0.0334086
ENSG00000248898		-4.16588	7.08686e-05
ENSG00000137628	DDX60	-4.16491	3.87693e-84
ENSG00000270876	ZNF30-AS1	-4.16294	0.0298896
ENSG00000199276	RNA5SP26	-4.16243	0.0425044
ENSG00000164649	CDCA7L	-4.16038	0.0239726
ENSG00000260401		-4.15964	0.0332619
ENSG00000258498	DIO3OS	-4.15896	0.0319509
ENSG00000206262	FOXL2NB	-4.15825	2.49581e-23
ENSG00000136514	RTP4	-4.15821	0.0168895
ENSG00000118785	SPP1	-4.15813	5.92812e-05
ENSG00000217314	UQCRFS1P3	-4.15806	0.0475258
ENSG00000158887	MPZ	-4.15785	0.0213907
ENSG00000076242	MLH1	-4.15307	0.0364308
ENSG00000150244	TRIM48	-4.15254	0.0338242
ENSG00000154415	PPP1R3A	-4.15197	0.0397249
ENSG00000249699	LINC02261	-4.15066	0.025672
ENSG00000262772	LINC01977	-4.14753	0.00832869
ENSG00000120051	CFAP58	-4.14433	0.0111135
ENSG00000117152	RGS4	-4.14241	0.0335565
ENSG00000234290		-4.14004	0.00608878
ENSG00000197153	H3C12	-4.13586	2.54673e-07
ENSG00000165072	MAMDC2	-4.13555	0.0169648
ENSG00000139292	LGR5	-4.12027	8.08639e-19
ENSG00000138061	CYP1B1	-4.11767	0
ENSG00000260027	HOXB7	-4.098	1.23919e-11
ENSG00000130147	SH3BP4	-4.09594	4.53536e-140
ENSG00000174951	FUT1	-4.09449	3.48138e-06
ENSG00000116977	LGALS8	-4.0893	4.20978e-06
ENSG00000146250	PRSS35	-4.08255	0.0136393
ENSG00000280453		-4.07364	0.0108399
ENSG00000179528	LBX2	-4.07147	0.0137768
ENSG00000177294	FBXO39	-4.06432	0.0228386
ENSG00000237251		-4.06314	0.014378
ENSG00000253878		-4.05808	0.00796704
ENSG00000145703	IQGAP2	-4.0514	4.60255e-07
ENSG00000270393		-4.04878	0.0407325
ENSG00000243969		-4.04785	0.0394711
ENSG00000147138	GPR174	-4.04693	0.0309572
ENSG00000283776	TAF11L13	-4.04446	0.0390261
ENSG00000259203		-4.04387	0.0320716
ENSG00000134339	SAA2	-4.0428	0.0235361
ENSG00000196589	MBD3L2B	-4.03744	0.0310237
ENSG00000258969	LINC02307	-4.03713	0.0459578
ENSG00000250782	TAF11L14	-4.03712	0.045607
ENSG00000143119	CD53	-4.03365	0.0394304
ENSG00000233860		-4.03364	0.0374825
ENSG00000160179	ABCG1	-4.03352	0.0225162
ENSG00000269151		-4.03074	0.0212002
ENSG00000256779		-4.03069	0.0226088
ENSG00000253361		-4.0303	0.0406972
ENSG00000156510	HKDC1	-4.03024	0.045607
ENSG00000178233	TMEM151B	-4.02926	0.0177076
ENSG00000137193	PIM1	-4.02836	6.89753e-111
ENSG00000277597		-4.02794	0.0216815
ENSG00000186479	RGS7BP	-4.02602	0.0438231
ENSG00000071991	CDH19	-4.02296	0.0382234
ENSG00000233215	LINC01687	-4.02133	3.47317e-08
ENSG00000103175	WFDC1	-4.02053	0.0300516
ENSG00000137757	CASP5	-4.01941	0.0208038
ENSG00000204449	TRIM49C	-4.01796	0.049708
ENSG00000285877		-4.01704	0.0329013
ENSG00000259321		-4.01446	0.029713
ENSG00000189233	NUGGC	-4.01058	0.0205694
ENSG00000115414	FN1	-4.01009	0.0365352
ENSG00000260903	XKR7	-4.00843	0.0425096
ENSG00000141293	SKAP1	-4.00793	0.0461735
ENSG00000070214	SLC44A1	-4.00737	2.89557e-208
ENSG00000281571		-4.00264	0.0377656
ENSG00000139445	FOXN4	-4.00237	1.51523e-13
ENSG00000228415	PTMAP1	-3.99865	0.0105309
ENSG00000141579	ZNF750	-3.9985	0.00918759
ENSG00000091986	CCDC80	-3.99319	5.42541e-71
ENSG00000129159	KCNC1	-3.99177	0.000186029
ENSG00000185404	SP140L	-3.99162	2.37871e-34
ENSG00000223561		-3.98933	2.11396e-21
ENSG00000239713	APOBEC3G	-3.98656	9.01566e-05
ENSG00000189221	MAOA	-3.98513	0.0108285
ENSG00000166025	AMOTL1	-3.98	2.12841e-21
ENSG00000138759	FRAS1	-3.97579	0.0214851
ENSG00000196381	ZNF781	-3.94625	8.65253e-07
ENSG00000057704	TMCC3	-3.94154	5.50128e-15
ENSG00000163110	PDLIM5	-3.94011	1.3473e-95
ENSG00000130528	HRC	-3.93868	3.86757e-08
ENSG00000106123	EPHB6	-3.93633	0.0160358
ENSG00000162636	FAM102B	-3.93574	7.87222e-69
ENSG00000164749	HNF4G	-3.9245	1.4604e-21
ENSG00000113296	THBS4	-3.92236	0.0219057
ENSG00000113196	HAND1	-3.92182	0.0141185
ENSG00000157782	CABP1	-3.91938	1.04726e-05
ENSG00000133138	TBC1D8B	-3.91581	6.38451e-11
ENSG00000287080	H3C3	-3.90897	0.0434119
ENSG00000047648	ARHGAP6	-3.90822	0.0153152
ENSG00000112139	MDGA1	-3.90737	3.96976e-16
ENSG00000203952	CCDC160	-3.90412	2.17345e-05
ENSG00000254366		-3.90281	0.0490397
ENSG00000236546	MYCL-AS1	-3.90233	0.0454585
ENSG00000179935	LINC00652	-3.89877	0.0453217
ENSG00000179284	DAND5	-3.89632	0.0305263
ENSG00000151025	GPR158	-3.89585	8.47354e-09
ENSG00000151617	EDNRA	-3.89342	0.000384188
ENSG00000182264	IZUMO1	-3.89059	0.0405791
ENSG00000261150	EPPK1	-3.8899	2.27172e-07
ENSG00000107742	SPOCK2	-3.88957	0.000192329
ENSG00000101203	COL20A1	-3.88928	0.0282515
ENSG00000181690	PLAG1	-3.88701	4.40018e-26
ENSG00000164106	SCRG1	-3.88043	0.033948
ENSG00000236502	SIX3-AS1	-3.87415	0.0282261
ENSG00000109158	GABRA4	-3.87256	0.0481505
ENSG00000188958	UTS2B	-3.86123	1.83033e-05
ENSG00000095370	SH2D3C	-3.85784	0.0199386
ENSG00000152217	SETBP1	-3.85383	0.0055596
ENSG00000169116	PARM1	-3.85374	0.00465419
ENSG00000140795	MYLK3	-3.85147	0.000251852
ENSG00000122861	PLAU	-3.84973	1.2879e-46
ENSG00000236283		-3.84036	6.20684e-16
ENSG00000089820	ARHGAP4	-3.8389	1.71057e-15
ENSG00000185070	FLRT2	-3.83815	5.88094e-07
ENSG00000101384	JAG1	-3.83762	3.19728e-68
ENSG00000153253	SCN3A	-3.83678	1.25521e-62
ENSG00000164342	TLR3	-3.83537	1.96624e-34
ENSG00000250934		-3.83327	0.0218469
ENSG00000104219	ZDHHC2	-3.82935	1.57616e-157
ENSG00000157613	CREB3L1	-3.82454	5.70828e-23
ENSG00000253706		-3.81599	0.022574
ENSG00000236404	VLDLR-AS1	-3.81139	1.39121e-08
ENSG00000136040	PLXNC1	-3.80037	1.96336e-17
ENSG00000143013	LMO4	-3.79563	2.27509e-87
ENSG00000113916	BCL6	-3.78183	3.45613e-28
ENSG00000228526	MIR34AHG	-3.7764	0.00489561
ENSG00000272078		-3.7671	0.0339088
ENSG00000149970	CNKSR2	-3.76223	0.00733098
ENSG00000137507	LRRC32	-3.76	3.51841e-05
ENSG00000254510		-3.7593	1.84671e-09
ENSG00000253525		-3.75836	0.0233545
ENSG00000283638		-3.75626	0.000390698
ENSG00000100342	APOL1	-3.75599	1.38012e-34
ENSG00000169760	NLGN1	-3.7541	0.000797666
ENSG00000227811	INKA2-AS1	-3.75394	0.0204514
ENSG00000187260	WDR86	-3.75284	0.00541336
ENSG00000105974	CAV1	-3.74988	4.36163e-06
ENSG00000152154	TMEM178A	-3.74877	0.040243
ENSG00000287025		-3.74825	0.0375864
ENSG00000104267	CA2	-3.74764	6.81272e-18
ENSG00000232077	LINC01031	-3.7443	0.0304036
ENSG00000283662		-3.73618	0.049553
ENSG00000154556	SORBS2	-3.73457	0.0411063
ENSG00000272068		-3.73309	0.0253996
ENSG00000280107		-3.72503	0.0284327
ENSG00000204261	PSMB8-AS1	-3.71615	0.0484699
ENSG00000185634	SHC4	-3.71341	8.85307e-07
ENSG00000135298	ADGRB3	-3.70872	5.00739e-05
ENSG00000168497	CAVIN2	-3.70789	0.000801856
ENSG00000054356	PTPRN	-3.70158	0.0494226
ENSG00000228412	LNC-LBCS	-3.68619	2.48684e-50
ENSG00000102935	ZNF423	-3.68569	1.10213e-30
ENSG00000136161	RCBTB2	-3.68362	8.53951e-34
ENSG00000140853	NLRC5	-3.68313	7.42056e-151
ENSG00000233509	ZNF197-AS1	-3.68089	0.0466225
ENSG00000152894	PTPRK	-3.67253	0.0341697
ENSG00000011465	DCN	-3.67198	2.32356e-10
ENSG00000152580	IGSF10	-3.6692	0.0136494
ENSG00000171557	FGG	-3.66449	8.0347e-20
ENSG00000185261	KIAA0825	-3.66329	0.00720996
ENSG00000108511	HOXB6	-3.66037	5.37518e-27
ENSG00000172061	LRRC15	-3.65922	0.0293224
ENSG00000164741	DLC1	-3.64598	0.0140302
ENSG00000169860	P2RY1	-3.64522	0.00123536
ENSG00000280205		-3.64355	0.0213498
ENSG00000100253	MIOX	-3.63522	0.0453839
ENSG00000102290	PCDH11X	-3.62875	2.18641e-38
ENSG00000154277	UCHL1	-3.62783	3.16246e-85
ENSG00000150656	CNDP1	-3.62741	0.0140201
ENSG00000092068	SLC7A8	-3.62654	1.66197e-05
ENSG00000135905	DOCK10	-3.61667	3.41732e-07
ENSG00000121236	TRIM6	-3.6151	2.0603e-13
ENSG00000287088		-3.61058	0.0075352
ENSG00000176928	GCNT4	-3.60168	1.72717e-27
ENSG00000130203	APOE	-3.60085	1.75188e-125
ENSG00000145642	SHISAL2B	-3.5998	1.57956e-10
ENSG00000160678	S100A1	-3.59468	2.15725e-27
ENSG00000164171	ITGA2	-3.57961	6.13122e-06
ENSG00000125246	CLYBL	-3.56895	3.19652e-08
ENSG00000183775	KCTD16	-3.55916	8.93772e-22
ENSG00000267265		-3.55913	1.99381e-05
ENSG00000177707	NECTIN3	-3.55674	0.0467804
ENSG00000196268	ZNF493	-3.55625	0.0406192
ENSG00000261336	EIF4BP5	-3.55405	0.0425837
ENSG00000250748		-3.55189	1.91579e-11
ENSG00000267288		-3.55163	0.0484631
ENSG00000265485	LINC01915	-3.5508	0.0103197
ENSG00000137285	TUBB2B	-3.54931	0.010264
ENSG00000249898	MCPH1-AS1	-3.54628	0.000165484
ENSG00000198829	SUCNR1	-3.54535	0.00444029
ENSG00000122367	LDB3	-3.54387	2.20779e-06
ENSG00000181652	ATG9B	-3.54382	0.0361135
ENSG00000203999	LINC01270	-3.54217	0.0467243
ENSG00000278390		-3.53752	0.0161841
ENSG00000167554	ZNF610	-3.53301	7.23914e-07
ENSG00000027075	PRKCH	-3.52381	1.15763e-57
ENSG00000125675	GRIA3	-3.52256	3.62993e-06
ENSG00000164683	HEY1	-3.508	3.00336e-36
ENSG00000233858	LINC02599	-3.50723	0.01936
ENSG00000269896		-3.48418	3.95695e-05
ENSG00000179104	TMTC2	-3.46686	1.27307e-21
ENSG00000165194	PCDH19	-3.46585	1.71086e-43
ENSG00000161544	CYGB	-3.45722	0.0416
ENSG00000149557	FEZ1	-3.4572	4.60607e-07
ENSG00000182912	TSPEAR-AS2	-3.4541	6.64509e-22
ENSG00000116774	OLFML3	-3.44481	0.0144055
ENSG00000007372	PAX6	-3.44169	2.57064e-05
ENSG00000265478		-3.43811	0.0418235
ENSG00000229474	PATL2	-3.42348	0.0134006
ENSG00000171488	LRRC8C	-3.42264	6.44659e-24
ENSG00000198416	ZNF658B	-3.40562	0.00340439
ENSG00000072201	LNX1	-3.40079	2.22148e-09
ENSG00000226711	FAM66C	-3.39799	0.00164577
ENSG00000151491	EPS8	-3.39713	1.57772e-12
ENSG00000183570	PCBP3	-3.38806	0.0296744
ENSG00000250159		-3.3836	1.73911e-10
ENSG00000228223	HCG11	-3.37512	0.0147163
ENSG00000103034	NDRG4	-3.36903	0.0193939
ENSG00000228672	PROB1	-3.36896	6.59e-34
ENSG00000236780	LINC01829	-3.36231	0.000787592
ENSG00000152952	PLOD2	-3.36053	2.85519e-18
ENSG00000082438	COBLL1	-3.35533	3.4932e-65
ENSG00000137393	RNF144B	-3.34719	0.0348592
ENSG00000232040	ZBED9	-3.34552	5.10148e-15
ENSG00000279561		-3.33435	0.0463566
ENSG00000273274	ZBTB8B	-3.3329	3.8894e-06
ENSG00000279932		-3.32516	0.0228756
ENSG00000224594	RPL29P19	-3.32343	0.0257068
ENSG00000182179	UBA7	-3.32109	1.07294e-21
ENSG00000272931		-3.32102	0.00349605
ENSG00000139144	PIK3C2G	-3.31714	0.0230962
ENSG00000200997	RNVU1-34	-3.31657	0.00119989
ENSG00000115266	APC2	-3.3146	1.43884e-177
ENSG00000240057		-3.3107	0.00350923
ENSG00000087085	ACHE	-3.30873	1.31846e-10
ENSG00000118004	COLEC11	-3.3032	0.00302257
ENSG00000181722	ZBTB20	-3.284	0.000462698
ENSG00000121440	PDZRN3	-3.2837	9.1365e-11
ENSG00000154319	FAM167A	-3.2741	2.41351e-08
ENSG00000146938	NLGN4X	-3.27016	1.49166e-97
ENSG00000149735	GPHA2	-3.26429	0.00498938
ENSG00000034239	EFCAB1	-3.26175	6.12841e-07
ENSG00000143248	RGS5	-3.25909	0.000236891
ENSG00000136267	DGKB	-3.25766	0.000237982
ENSG00000280143		-3.25077	1.21546e-05
ENSG00000159216	RUNX1	-3.24713	1.87679e-09
ENSG00000112175	BMP5	-3.23936	0.0245771
ENSG00000174482	LINGO2	-3.23475	0.0429233
ENSG00000133687	TMTC1	-3.23015	1.96865e-12
ENSG00000188649	CC2D2B	-3.22945	0.0278824
ENSG00000163435	ELF3	-3.22038	0.00437048
ENSG00000148798	INA	-3.21536	2.51705e-158
ENSG00000170558	CDH2	-3.20159	8.29908e-130
ENSG00000235501		-3.19697	1.64788e-07
ENSG00000234690	EPCAM-DT	-3.19691	0.0418864
ENSG00000026652	AGPAT4	-3.19059	9.38722e-13
ENSG00000274929		-3.18665	0.0315191
ENSG00000272398	CD24	-3.18044	0.0280947
ENSG00000175899	A2M	-3.1752	0.0386531
ENSG00000271581		-3.17398	0.00014976
ENSG00000249169		-3.16957	0.0334172
ENSG00000125629	INSIG2	-3.16712	1.32563e-60
ENSG00000273363		-3.163	0.03485
ENSG00000067798	NAV3	-3.15656	5.82167e-69
ENSG00000128564	VGF	-3.156	1.3353e-68
ENSG00000138829	FBN2	-3.1556	2.64262e-183
ENSG00000166924	NYAP1	-3.1539	1.60586e-10
ENSG00000198959	TGM2	-3.13269	2.16791e-07
ENSG00000205592	MUC19	-3.12857	2.94818e-09
ENSG00000112343	TRIM38	-3.12751	4.6869e-08
ENSG00000168062	BATF2	-3.12665	3.47436e-16
ENSG00000171954	CYP4F22	-3.12651	0.00805685
ENSG00000248508	SRP14-AS1	-3.12613	0.000110369
ENSG00000205213	LGR4	-3.12428	2.67757e-195
ENSG00000162620	LRRIQ3	-3.12286	0.00616646
ENSG00000273805		-3.12227	0.04704
ENSG00000135951	TSGA10	-3.12102	5.29821e-10
ENSG00000118160	SLC8A2	-3.11108	1.6154e-12
ENSG00000163590	PPM1L	-3.10353	5.77719e-21
ENSG00000179583	CIITA	-3.1028	0.0315332
ENSG00000197245	FAM110D	-3.09998	4.37245e-17
ENSG00000106415	GLCCI1	-3.09817	2.56952e-07
ENSG00000128833	MYO5C	-3.09711	0.0141226
ENSG00000278703		-3.09222	0.0401854
ENSG00000123405	NFE2	-3.08972	2.28663e-08
ENSG00000168394	TAP1	-3.08629	8.80419e-160
ENSG00000158055	GRHL3	-3.08294	0.0375431
ENSG00000162946	DISC1	-3.08216	1.59894e-06
ENSG00000135919	SERPINE2	-3.07794	0.000260153
ENSG00000137831	UACA	-3.07086	0
ENSG00000221923	ZNF880	-3.0652	0.000218467
ENSG00000286373		-3.06464	1.50231e-06
ENSG00000055813	CCDC85A	-3.06293	0.0115616
ENSG00000052126	PLEKHA5	-3.06149	3.44034e-80
ENSG00000135678	CPM	-3.0568	0.00285521
ENSG00000229140	CCDC26	-3.05132	2.58694e-06
ENSG00000157214	STEAP2	-3.04935	9.51144e-16
ENSG00000135378	PRRG4	-3.03668	2.28693e-08
ENSG00000168148	H3-4	-3.03378	0.0203778
ENSG00000117148	ACTL8	-3.03039	4.37317e-05
ENSG00000104848	KCNA7	-3.0298	3.03466e-09
ENSG00000125384	PTGER2	-3.02643	0.0146637
ENSG00000173947	PIFO	-3.02511	0.000865826
ENSG00000139112	GABARAPL1	-3.00326	5.90017e-20
ENSG00000113083	LOX	-3.00281	1.22903e-12
ENSG00000256340	ABCC6P1	-2.98812	0.000224926
ENSG00000129946	SHC2	-2.98064	1.24546e-13
ENSG00000174130	TLR6	-2.97382	0.00404046
ENSG00000178568	ERBB4	-2.97198	2.90944e-27
ENSG00000118997	DNAH7	-2.97142	1.96511e-06
ENSG00000244578	LINC01391	-2.96809	0.00797997
ENSG00000184368	MAP7D2	-2.96782	2.21396e-74
ENSG00000064300	NGFR	-2.96631	6.71343e-08
ENSG00000066382	MPPED2	-2.96375	0.0176991
ENSG00000153531	ADPRHL1	-2.96153	2.21716e-08
ENSG00000267475		-2.95824	0.0437358
ENSG00000168772	CXXC4	-2.95642	6.14798e-302
ENSG00000250337	PURPL	-2.95269	1.00457e-86
ENSG00000118298	CA14	-2.95066	4.12903e-58
ENSG00000144645	OSBPL10	-2.94182	3.32e-05
ENSG00000287329		-2.9344	0.00119068
ENSG00000122824	NUDT10	-2.92921	0.000255973
ENSG00000168918	INPP5D	-2.92409	3.32124e-08
ENSG00000162772	ATF3	-2.91177	1.40473e-31
ENSG00000139572	GPR84	-2.90867	0.000112954
ENSG00000172575	RASGRP1	-2.90559	0.000830976
ENSG00000265984		-2.90542	8.88281e-05
ENSG00000104324	CPQ	-2.89377	2.72556e-15
ENSG00000188015	S100A3	-2.8872	0.000394951
ENSG00000244627	TPTEP2	-2.88595	8.22194e-09
ENSG00000130940	CASZ1	-2.88403	1.03023e-149
ENSG00000128268	MGAT3	-2.88138	5.16387e-57
ENSG00000171451	DSEL	-2.88107	6.96803e-32
ENSG00000247746	USP51	-2.87964	5.70199e-31
ENSG00000179046	TRIML2	-2.87472	2.7601e-10
ENSG00000108679	LGALS3BP	-2.86866	4.55677e-112
ENSG00000173801	JUP	-2.86842	8.25464e-73
ENSG00000152207	CYSLTR2	-2.86809	1.52004e-10
ENSG00000197380	DACT3	-2.86597	5.07336e-70
ENSG00000164105	SAP30	-2.85302	4.86762e-15
ENSG00000135452	TSPAN31	-2.85282	8.93472e-28
ENSG00000112183	RBM24	-2.85163	0.0177713
ENSG00000286193		-2.85044	0.0143325
ENSG00000106976	DNM1	-2.8394	1.20236e-103
ENSG00000213305	HNRNPCP6	-2.83456	3.12841e-06
ENSG00000105464	GRIN2D	-2.82436	3.74773e-22
ENSG00000184349	EFNA5	-2.82386	1.31664e-18
ENSG00000104967	NOVA2	-2.82314	1.29655e-24
ENSG00000134824	FADS2	-2.81887	4.98755e-193
ENSG00000197301	HMGA2-AS1	-2.81225	0.00328083
ENSG00000115963	RND3	-2.80477	0.010269
ENSG00000183876	ARSI	-2.80059	0.0214673
ENSG00000085491	SLC25A24	-2.79362	2.40534e-58
ENSG00000116883	NA	-2.79132	1.20587e-22
ENSG00000118257	NRP2	-2.78947	0.00998292
ENSG00000275591	XKR5	-2.78487	3.00928e-13
ENSG00000071073	MGAT4A	-2.77996	0.00527184
ENSG00000149591	TAGLN	-2.77937	1.69359e-131
ENSG00000154646	TMPRSS15	-2.76534	0.0110015
ENSG00000226043		-2.75983	0.000158272
ENSG00000127328	RAB3IP	-2.75871	1.78775e-10
ENSG00000099365	STX1B	-2.75763	7.49857e-07
ENSG00000134864	GGACT	-2.75265	1.32615e-06
ENSG00000188729	OSTN	-2.73368	5.08156e-31
ENSG00000276727		-2.73013	0.0233056
ENSG00000170468	RIOX1	-2.72497	9.17054e-70
ENSG00000205269	TMEM170B	-2.72036	1.78864e-05
ENSG00000166323	C11orf65	-2.71792	0.0420695
ENSG00000136205	TNS3	-2.71304	5.73795e-17
ENSG00000117114	ADGRL2	-2.70785	1.34107e-11
ENSG00000183186	C2CD4C	-2.70586	2.20983e-18
ENSG00000041982	TNC	-2.70263	7.80025e-14
ENSG00000139329	LUM	-2.70147	0.00739936
ENSG00000236914	LINC01852	-2.69971	4.51217e-05
ENSG00000205832	C16orf96	-2.6964	0.00511893
ENSG00000119938	PPP1R3C	-2.69063	3.29456e-10
ENSG00000105605	CACNG7	-2.68846	7.97426e-59
ENSG00000006468	ETV1	-2.68823	7.6496e-39
ENSG00000229953		-2.68251	0.00843779
ENSG00000182580	EPHB3	-2.67999	1.70609e-18
ENSG00000138835	RGS3	-2.674	4.72725e-158
ENSG00000272144		-2.67051	0.0438887
ENSG00000079841	RIMS1	-2.67019	0.026918
ENSG00000170381	SEMA3E	-2.66784	0.0017765
ENSG00000280739	EIF1B-AS1	-2.66541	6.42458e-05
ENSG00000250838		-2.66081	0.000842096
ENSG00000279692		-2.66046	0.0266748
ENSG00000091262	ABCC6	-2.65915	3.49286e-16
ENSG00000135828	RNASEL	-2.65763	1.60608e-13
ENSG00000171903	CYP4F11	-2.65653	0.0072762
ENSG00000105270	CLIP3	-2.65645	6.65635e-19
ENSG00000165434	PGM2L1	-2.65606	3.34249e-11
ENSG00000186235	LINC02610	-2.65493	0.0111419
ENSG00000158246	TENT5B	-2.64941	8.91451e-07
ENSG00000163449	TMEM169	-2.63533	8.58911e-08
ENSG00000144802	NFKBIZ	-2.63311	1.53253e-70
ENSG00000072609	CHFR	-2.63237	0.0225167
ENSG00000262155	LINC02175	-2.62784	2.32386e-06
ENSG00000170271	FAXDC2	-2.62746	4.8841e-11
ENSG00000265778		-2.62608	0.000251852
ENSG00000149212	SESN3	-2.60938	0.0205721
ENSG00000138496	PARP9	-2.60778	3.75315e-86
ENSG00000123609	NMI	-2.60229	5.79915e-28
ENSG00000197852	INKA2	-2.60178	2.13151e-12
ENSG00000259326		-2.59903	0.000940623
ENSG00000233491		-2.59035	1.86648e-15
ENSG00000137942	FNBP1L	-2.58949	1.18946e-68
ENSG00000151320	AKAP6	-2.58012	4.35315e-06
ENSG00000272606		-2.57683	0.00371661
ENSG00000111801	BTN3A3	-2.57626	9.48543e-16
ENSG00000010810	FYN	-2.57028	6.8096e-08
ENSG00000260448	LCMT1-AS1	-2.56962	0.0184336
ENSG00000228137		-2.56265	0.0455885
ENSG00000122786	CALD1	-2.56146	3.1161e-244
ENSG00000150938	CRIM1	-2.55288	9.60777e-07
ENSG00000100867	DHRS2	-2.55106	9.7789e-05
ENSG00000184371	CSF1	-2.5492	4.8907e-49
ENSG00000185633	NDUFA4L2	-2.54572	1.07477e-05
ENSG00000244723	ASLP1	-2.54541	0.0269623
ENSG00000118292	C1orf54	-2.53762	4.51468e-17
ENSG00000247081	BAALC-AS1	-2.53634	0.000346498
ENSG00000159231	CBR3	-2.53373	0.000367861
ENSG00000172733	PURG	-2.53237	0.00205567
ENSG00000286416		-2.53212	0.00529599
ENSG00000274922		-2.52991	0.00986765
ENSG00000164418	GRIK2	-2.52631	2.71572e-06
ENSG00000253284		-2.52556	7.94758e-05
ENSG00000273399		-2.51976	0.0327514
ENSG00000181104	F2R	-2.5166	1.00922e-15
ENSG00000122481	RWDD3	-2.51362	5.43429e-07
ENSG00000135439	AGAP2	-2.51361	3.45529e-44
ENSG00000085741	WNT11	-2.51048	0.0494944
ENSG00000144445	KANSL1L	-2.50933	4.52767e-18
ENSG00000204086	RPA4	-2.50698	6.05189e-08
ENSG00000175170	FAM182B	-2.50545	1.7347e-05
ENSG00000264107		-2.5035	0.0203392
ENSG00000135838	NPL	-2.49803	2.83043e-24
ENSG00000224189	HAGLR	-2.4953	0.0235922
ENSG00000188906	LRRK2	-2.48775	0.000650544
ENSG00000148200	NR6A1	-2.48693	1.80937e-163
ENSG00000233593	LINC02609	-2.48221	1.28084e-05
ENSG00000104611	SH2D4A	-2.47877	1.00242e-120
ENSG00000257176		-2.45123	0.0272221
ENSG00000173114	LRRN3	-2.44707	1.55789e-08
ENSG00000272689		-2.44618	0.0349784
ENSG00000068831	RASGRP2	-2.44467	4.67922e-48
ENSG00000198478	SH3BGRL2	-2.44431	2.6235e-18
ENSG00000158815	FGF17	-2.4417	0.031525
ENSG00000134256	CD101	-2.43897	0.0302145
ENSG00000234928	LINC01659	-2.43465	0.0192958
ENSG00000279066	HEXD-IT1	-2.43418	0.0487633
ENSG00000198157	HMGN5	-2.43197	7.92623e-42
ENSG00000136531	SCN2A	-2.43151	2.77253e-25
ENSG00000109339	MAPK10	-2.42546	0.0151803
ENSG00000279726		-2.42264	0.0147549
ENSG00000106366	SERPINE1	-2.41895	1.63145e-20
ENSG00000189195	BTBD8	-2.41649	9.59621e-06
ENSG00000187720	THSD4	-2.40979	2.2825e-17
ENSG00000164061	BSN	-2.40668	1.76092e-17
ENSG00000279879		-2.40034	0.00305065
ENSG00000126016	AMOT	-2.39784	7.06685e-20
ENSG00000131409	LRRC4B	-2.39196	2.83375e-35
ENSG00000120217	CD274	-2.3913	0.0115857
ENSG00000255100		-2.38763	0.0197339
ENSG00000206557	TRIM71	-2.38608	3.85634e-164
ENSG00000178662	CSRNP3	-2.38523	2.97726e-42
ENSG00000227456	LINC00310	-2.38423	0.0446531
ENSG00000274447		-2.3839	0.025048
ENSG00000162458	FBLIM1	-2.38176	3.11396e-36
ENSG00000058063	ATP11B	-2.3776	7.67933e-106
ENSG00000235904	RBMS3-AS3	-2.37565	3.51052e-14
ENSG00000114805	PLCH1	-2.37367	1.07854e-20
ENSG00000238197	PAXBP1-AS1	-2.37272	0.000224771
ENSG00000188848	BEND4	-2.37103	2.28037e-47
ENSG00000171766	GATM	-2.36561	3.12578e-05
ENSG00000183979	NPB	-2.36517	0.0437885
ENSG00000102796	DHRS12	-2.36187	0.000169696
ENSG00000104381	GDAP1	-2.35819	4.49564e-96
ENSG00000181781	ODF3L2	-2.35632	0.000474911
ENSG00000148450	MSRB2	-2.35374	2.21552e-11
ENSG00000148926	ADM	-2.35242	1.86924e-31
ENSG00000186976	EFCAB6	-2.35061	0.0056224
ENSG00000079308	TNS1	-2.34523	0.000410666
ENSG00000213694	S1PR3	-2.34284	3.8106e-14
ENSG00000182326	C1S	-2.34095	1.46092e-17
ENSG00000138622	HCN4	-2.34	0.000213422
ENSG00000138434	ITPRID2	-2.33382	3.5071e-98
ENSG00000287016		-2.33155	0.0241744
ENSG00000180628	PCGF5	-2.3301	3.18468e-05
ENSG00000006283	CACNA1G	-2.32854	7.38419e-12
ENSG00000254760		-2.32376	0.0482732
ENSG00000268225	NA	-2.31942	0.00115578
ENSG00000151917	BEND6	-2.31563	0.0111741
ENSG00000176978	DPP7	-2.30994	2.69985e-05
ENSG00000188322	SBK1	-2.30606	1.77208e-24
ENSG00000272841		-2.30454	0.000445767
ENSG00000256594		-2.30259	0.0172126
ENSG00000178343	SHISA3	-2.29301	4.20054e-34
ENSG00000187479	C11orf96	-2.28876	0.0132533
ENSG00000231131	LNCAROD	-2.28788	0.000179951
ENSG00000225761		-2.28764	0.017287
ENSG00000228175	GEMIN8P4	-2.28762	0.0205112
ENSG00000160716	CHRNB2	-2.28427	0.0187545
ENSG00000257702	LBX2-AS1	-2.28086	0.000120075
ENSG00000250397		-2.27817	0.0227685
ENSG00000154734	ADAMTS1	-2.27021	1.29655e-24
ENSG00000106714	CNTNAP3	-2.26181	0.0223172
ENSG00000174837	ADGRE1	-2.26171	0.0138892
ENSG00000120693	SMAD9	-2.25192	3.81106e-22
ENSG00000277639		-2.2473	7.41515e-05
ENSG00000136167	LCP1	-2.24722	2.51896e-05
ENSG00000168135	KCNJ4	-2.24694	3.35297e-06
ENSG00000233325	MIPEPP3	-2.24653	0.04956
ENSG00000111554	MDM1	-2.24566	2.35054e-66
ENSG00000141524	TMC6	-2.24473	2.78319e-25
ENSG00000228889	UBAC2-AS1	-2.24216	1.90966e-06
ENSG00000232046	LINC01798	-2.24158	0.00022679
ENSG00000258655	ARHGAP5-AS1	-2.23776	0.00048273
ENSG00000174721	FGFBP3	-2.23154	2.02737e-38
ENSG00000205560	CPT1B	-2.22975	0.0270282
ENSG00000184524	CEND1	-2.22901	1.42986e-16
ENSG00000184788	SATL1	-2.2283	0.0233495
ENSG00000224950		-2.22776	0.0382964
ENSG00000233006	MIR3936HG	-2.22544	0.0297613
ENSG00000224356		-2.22377	0.0417884
ENSG00000117115	PADI2	-2.22322	0.029754
ENSG00000158321	AUTS2	-2.21962	0.00047055
ENSG00000173705	SUSD5	-2.21371	4.29816e-21
ENSG00000171227	TMEM37	-2.21227	8.76464e-17
ENSG00000126778	SIX1	-2.20963	4.5991e-172
ENSG00000257718	CPNE8-AS1	-2.20565	0.00223642
ENSG00000128656	CHN1	-2.20431	5.02257e-17
ENSG00000183850	ZNF730	-2.19649	6.36669e-24
ENSG00000267886		-2.19393	2.31945e-12
ENSG00000223745	CCDC18-AS1	-2.19375	2.09397e-17
ENSG00000020181	ADGRA2	-2.19254	3.92038e-91
ENSG00000105419	MEIS3	-2.19244	8.59646e-53
ENSG00000233382	NKAPP1	-2.18689	0.00591582
ENSG00000168016	TRANK1	-2.1833	0.00143397
ENSG00000026950	BTN3A1	-2.18269	8.7855e-19
ENSG00000159200	RCAN1	-2.18216	1.68032e-83
ENSG00000120075	HOXB5	-2.18111	1.47779e-21
ENSG00000214855	APOC1P1	-2.1713	0.0235914
ENSG00000173221	GLRX	-2.16116	0.000352601
ENSG00000234745	HLA-B	-2.16015	5.32296e-108
ENSG00000140443	IGF1R	-2.15641	2.60562e-21
ENSG00000182511	FES	-2.15526	0.0149097
ENSG00000226683	PWWP2AP1	-2.14793	0.000343759
ENSG00000104081	BMF	-2.13998	0.00238545
ENSG00000204882	GPR20	-2.13629	0.0030913
ENSG00000106804	C5	-2.13515	6.8229e-35
ENSG00000233695	GAS6-AS1	-2.13268	0.0304595
ENSG00000203865	ATP1A1-AS1	-2.12225	1.8808e-05
ENSG00000008735	MAPK8IP2	-2.12087	7.46089e-32
ENSG00000257986	LINC02306	-2.11977	0.00357166
ENSG00000123329	ARHGAP9	-2.11379	0.0285497
ENSG00000105971	CAV2	-2.11323	0.000199242
ENSG00000174004	NRROS	-2.10849	6.57584e-05
ENSG00000172828	CES3	-2.10759	7.84062e-06
ENSG00000267939		-2.10281	0.0471107
ENSG00000100276	RASL10A	-2.09796	0.00022087
ENSG00000184898	RBM43	-2.09682	2.95658e-15
ENSG00000143333	RGS16	-2.0911	2.89478e-87
ENSG00000130052	STARD8	-2.08454	0.0350363
ENSG00000171174	RBKS	-2.08159	0.0231042
ENSG00000198756	COLGALT2	-2.08127	5.34823e-42
ENSG00000149131	SERPING1	-2.07725	9.44365e-51
ENSG00000114739	ACVR2B	-2.07596	3.20139e-100
ENSG00000111341	MGP	-2.07164	2.44188e-20
ENSG00000181751	MACIR	-2.06218	2.90716e-20
ENSG00000255441		-2.05892	0.0153966
ENSG00000256139		-2.05855	0.0112263
ENSG00000214050	FBXO16	-2.05187	1.31362e-06
ENSG00000286230		-2.05131	0.0348284
ENSG00000000003	TSPAN6	-2.05064	1.08911e-65
ENSG00000175564	UCP3	-2.04646	0.0218469
ENSG00000196296	ATP2A1	-2.04639	9.89057e-05
ENSG00000184867	ARMCX2	-2.04345	1.14984e-54
ENSG00000205978	NYNRIN	-2.04311	2.45007e-19
ENSG00000154309	DISP1	-2.0414	0.000188798
ENSG00000164308	ERAP2	-2.04011	4.46612e-40
ENSG00000250327	RPSAP70	-2.03978	0.03072
ENSG00000259439	LINC01833	-2.03954	0.000190287
ENSG00000171204	TMEM126B	-2.03901	7.90946e-31
ENSG00000019549	SNAI2	-2.03159	1.10502e-67
ENSG00000189283	FHIT	-2.02785	4.417e-05
ENSG00000202415	RN7SKP269	-2.02536	0.0358891
ENSG00000280734	LINC01232	-2.02464	1.03497e-18
ENSG00000256742	KDM2B-DT	-2.02118	0.00913409
ENSG00000139973	SYT16	-2.01911	4.36338e-05
ENSG00000188171	ZNF626	-2.01783	1.63552e-28
ENSG00000170579	DLGAP1	-2.01591	4.93586e-06
ENSG00000196208	GREB1	-2.01542	2.86368e-11
ENSG00000179941	BBS10	-2.01394	9.63463e-17
ENSG00000170915	PAQR8	-2.01304	0.000216422
ENSG00000147852	VLDLR	-2.00873	1.92015e-65
ENSG00000233101	HOXB-AS3	-1.99868	0.00351064
ENSG00000117020	AKT3	-1.99479	0.0278561
ENSG00000276672		-1.99164	7.67154e-21
ENSG00000179456	ZBTB18	-1.98853	0.0111949
ENSG00000179277	MEIS3P1	-1.98741	0.0235878
ENSG00000257815	PRANCR	-1.98689	3.76329e-05
ENSG00000244945		-1.98096	0.0400669
ENSG00000169946	ZFPM2	-1.97635	0.0192527
ENSG00000135899	SP110	-1.97104	1.67792e-13
ENSG00000152284	TCF7L1	-1.9691	6.22102e-19
ENSG00000215417	MIR17HG	-1.969	6.88529e-37
ENSG00000196361	ELAVL3	-1.9688	4.18789e-05
ENSG00000186470	BTN3A2	-1.96861	4.04815e-28
ENSG00000243244	STON1	-1.96852	0.000946283
ENSG00000116017	ARID3A	-1.96827	1.88341e-172
ENSG00000168939	SPRY3	-1.96812	4.28339e-06
ENSG00000128165	ADM2	-1.96627	2.70568e-29
ENSG00000187902	SHISA7	-1.96621	0.00435665
ENSG00000170421	KRT8	-1.96594	0.00715359
ENSG00000213928	IRF9	-1.96577	9.43967e-11
ENSG00000159761	C16orf86	-1.9645	0.0442495
ENSG00000143341	HMCN1	-1.96204	0.0110015
ENSG00000106868	SUSD1	-1.96121	0.0191767
ENSG00000162576	MXRA8	-1.96057	0.0412274
ENSG00000162595	DIRAS3	-1.95868	7.23766e-06
ENSG00000267249		-1.95547	0.0303193
ENSG00000117569	PTBP2	-1.95357	1.59937e-60
ENSG00000137642	SORL1	-1.95124	3.92411e-08
ENSG00000188153	COL4A5	-1.94991	3.80362e-44
ENSG00000118898	PPL	-1.94372	0.0355597
ENSG00000268364	SMC5-AS1	-1.94361	0.00565521
ENSG00000142408	CACNG8	-1.94334	1.25307e-28
ENSG00000151914	DST	-1.93645	5.28824e-184
ENSG00000137460	FHDC1	-1.93631	0.0134756
ENSG00000111817	DSE	-1.93469	2.83183e-29
ENSG00000155363	MOV10	-1.93414	2.03418e-99
ENSG00000260400		-1.93266	6.20443e-06
ENSG00000180998	GPR137C	-1.9283	1.98405e-09
ENSG00000166173	LARP6	-1.92679	1.41393e-44
ENSG00000251615		-1.92465	0.00895022
ENSG00000267030		-1.92134	0.0414994
ENSG00000150456	EEF1AKMT1	-1.91904	7.80278e-09
ENSG00000130475	FCHO1	-1.91326	1.571e-29
ENSG00000203497	PDCD4-AS1	-1.90847	0.0316446
ENSG00000259291	ZNF710-AS1	-1.90531	0.0321506
ENSG00000228192		-1.90444	1.17451e-05
ENSG00000042493	CAPG	-1.89999	0.0218071
ENSG00000157601	MX1	-1.89951	0.00184624
ENSG00000139289	PHLDA1	-1.89875	6.76432e-07
ENSG00000205090	TMEM240	-1.89634	0.0300516
ENSG00000162643	WDR63	-1.8962	1.65822e-05
ENSG00000109771	LRP2BP	-1.8958	0.0284808
ENSG00000172403	SYNPO2	-1.89559	1.51531e-06
ENSG00000274114	ALOX15P1	-1.89553	0.00910003
ENSG00000113389	NPR3	-1.89526	0.000143138
ENSG00000287275		-1.89515	0.0431156
ENSG00000272871		-1.88949	0.00455501
ENSG00000196872	KIAA1211L	-1.88886	0.0340305
ENSG00000233836		-1.88824	8.85167e-26
ENSG00000143079	CTTNBP2NL	-1.88772	3.50241e-38
ENSG00000179862	CITED4	-1.88579	0.00554891
ENSG00000139793	MBNL2	-1.88192	0.0001755
ENSG00000160097	FNDC5	-1.88042	8.76365e-10
ENSG00000180340	FZD2	-1.87902	2.18923e-79
ENSG00000196172	ZNF681	-1.8723	1.17235e-27
ENSG00000138613	APH1B	-1.87204	1.19217e-16
ENSG00000258744		-1.87187	0.0138302
ENSG00000250012		-1.8674	0.0386531
ENSG00000107614	TRDMT1	-1.86515	3.22413e-21
ENSG00000095383	TBC1D2	-1.86498	1.30717e-05
ENSG00000137944	KYAT3	-1.86444	1.32694e-35
ENSG00000213366	GSTM2	-1.86304	1.74648e-05
ENSG00000003989	SLC7A2	-1.86248	2.56424e-156
ENSG00000024422	EHD2	-1.86098	0.0270074
ENSG00000100604	CHGA	-1.85463	0.00497858
ENSG00000172602	RND1	-1.85365	0.0217897
ENSG00000161243	FBXO27	-1.84973	3.2719e-13
ENSG00000226520	KIRREL1-IT1	-1.84797	0.0248645
ENSG00000268357	VN1R81P	-1.84605	0.0082058
ENSG00000104290	FZD3	-1.84221	1.68618e-66
ENSG00000169871	TRIM56	-1.84062	3.92843e-65
ENSG00000152229	PSTPIP2	-1.83897	2.77209e-14
ENSG00000245281		-1.83848	0.0386531
ENSG00000180448	ARHGAP45	-1.83634	3.46145e-08
ENSG00000133111	RFXAP	-1.83512	6.74921e-12
ENSG00000180769	WDFY3-AS2	-1.83074	3.28794e-05
ENSG00000249776		-1.82956	1.00951e-12
ENSG00000108515	ENO3	-1.82636	5.94366e-56
ENSG00000272129		-1.81921	0.0411143
ENSG00000214562	NUTM2D	-1.81622	0.0355228
ENSG00000130643	CALY	-1.8153	0.000605344
ENSG00000166292	TMEM100	-1.81466	0.0276164
ENSG00000136114	THSD1	-1.81426	0.0101131
ENSG00000253276	CCDC71L	-1.811	3.78829e-22
ENSG00000248932		-1.81099	4.74363e-05
ENSG00000198155	ZNF876P	-1.81026	0.00408685
ENSG00000273148	LINC00653	-1.80981	0.0189962
ENSG00000082458	DLG3	-1.8097	2.33337e-33
ENSG00000261655		-1.80509	0.00341171
ENSG00000139926	FRMD6	-1.80455	1.36766e-56
ENSG00000264920		-1.80449	0.00013006
ENSG00000124762	CDKN1A	-1.80137	2.61583e-75
ENSG00000229980	TOB1-AS1	-1.80029	0.0388183
ENSG00000228065	LINC01515	-1.80002	1.78468e-09
ENSG00000181381	DDX60L	-1.79731	1.27115e-31
ENSG00000186814	ZSCAN30	-1.79615	8.7213e-27
ENSG00000266714	MYO15B	-1.79164	5.59202e-05
ENSG00000136848	DAB2IP	-1.79003	3.73425e-106
ENSG00000261770		-1.78549	1.35077e-15
ENSG00000227403	LINC01806	-1.78348	0.0117546
ENSG00000224616	RTCA-AS1	-1.78295	2.87209e-09
ENSG00000129244	ATP1B2	-1.78185	8.34881e-05
ENSG00000227268	KLLN	-1.78177	0.00129328
ENSG00000119703	ZC2HC1C	-1.78014	0.0100891
ENSG00000232450		-1.77819	0.0119224
ENSG00000107201	DDX58	-1.77727	1.72627e-20
ENSG00000145700	ANKRD31	-1.77084	0.000776088
ENSG00000176723	ZNF843	-1.76981	0.0221862
ENSG00000249984		-1.76932	4.18305e-05
ENSG00000281026	N4BP2L2-IT2	-1.7661	7.90151e-10
ENSG00000142694	EVA1B	-1.76405	5.1082e-18
ENSG00000151474	FRMD4A	-1.76249	1.1618e-14
ENSG00000116285	ERRFI1	-1.75742	4.99016e-42
ENSG00000177599	ZNF491	-1.75635	0.00907002
ENSG00000273373		-1.75523	8.79608e-09
ENSG00000287145		-1.75185	0.0119537
ENSG00000057019	DCBLD2	-1.75011	2.3689e-73
ENSG00000142235	LMTK3	-1.74964	4.68772e-09
ENSG00000182742	HOXB4	-1.74728	2.98286e-18
ENSG00000261654		-1.74491	0.0153753
ENSG00000260077		-1.74404	0.0162395
ENSG00000143067	ZNF697	-1.74363	1.00992e-20
ENSG00000138386	NAB1	-1.74139	6.14688e-47
ENSG00000269973		-1.74	4.81213e-06
ENSG00000151065	DCP1B	-1.73994	3.77153e-20
ENSG00000144115	THNSL2	-1.73942	3.49139e-16
ENSG00000247708	STX18-AS1	-1.73908	2.91916e-14
ENSG00000204947	ZNF425	-1.73689	1.2907e-14
ENSG00000105429	MEGF8	-1.73676	9.22824e-54
ENSG00000116574	RHOU	-1.73355	9.4456e-09
ENSG00000068079	IFI35	-1.73239	9.61926e-25
ENSG00000273723		-1.7317	0.0153616
ENSG00000116741	RGS2	-1.72942	8.6089e-80
ENSG00000150593	PDCD4	-1.72543	2.49948e-31
ENSG00000138764	CCNG2	-1.72049	1.23023e-11
ENSG00000006025	OSBPL7	-1.72015	1.45837e-08
ENSG00000070669	ASNS	-1.71784	2.89413e-08
ENSG00000139117	CPNE8	-1.71763	3.39894e-89
ENSG00000279794		-1.71708	0.0331249
ENSG00000242852	ZNF709	-1.71707	0.0332619
ENSG00000128965	CHAC1	-1.71573	2.2184e-37
ENSG00000215808	LINC01139	-1.71244	2.15542e-13
ENSG00000261485	PAN3-AS1	-1.70456	0.00161271
ENSG00000129353	SLC44A2	-1.70387	3.6895e-35
ENSG00000234473	ZNF101P2	-1.70362	0.0116091
ENSG00000230074		-1.7033	0.00030987
ENSG00000197536	IRF1-AS1	-1.70272	3.27424e-05
ENSG00000184619	KRBA2	-1.70069	0.0271588
ENSG00000226715	LINC01709	-1.69794	0.00365144
ENSG00000260498		-1.69318	0.0166671
ENSG00000196632	WNK3	-1.69277	7.47615e-55
ENSG00000259153		-1.68493	0.00421014
ENSG00000254602		-1.6838	8.00077e-12
ENSG00000164463	CREBRF	-1.68123	6.14508e-06
ENSG00000130413	STK33	-1.67589	8.85022e-13
ENSG00000286340		-1.67311	0.0232971
ENSG00000167100	SAMD14	-1.65282	0.00292539
ENSG00000177738		-1.64919	1.27743e-05
ENSG00000224699	LAMTOR5-AS1	-1.64875	1.74883e-09
ENSG00000003436	TFPI	-1.64749	1.48645e-05
ENSG00000249378	LINC01060	-1.64522	1.33423e-12
ENSG00000152818	UTRN	-1.64389	1.04321e-35
ENSG00000128342	LIF	-1.64272	6.44902e-42
ENSG00000185437	SH3BGR	-1.64256	0.0130565
ENSG00000226849		-1.64203	0.0370842
ENSG00000187546	AGMO	-1.64076	8.51865e-05
ENSG00000198939	ZFP2	-1.63848	0.0172436
ENSG00000198298	ZNF485	-1.63805	5.44751e-10
ENSG00000172748	ZNF596	-1.63697	4.57703e-06
ENSG00000115159	GPD2	-1.63295	2.28003e-66
ENSG00000205559	CHKB-DT	-1.62582	3.55206e-08
ENSG00000288045		-1.62357	0.0146138
ENSG00000198168	SVIP	-1.61902	0.0337131
ENSG00000156463	SH3RF2	-1.61718	2.09735e-13
ENSG00000055163	CYFIP2	-1.61714	1.99269e-35
ENSG00000280239		-1.61582	0.000295692
ENSG00000197329	PELI1	-1.61578	2.51317e-31
ENSG00000132718	SYT11	-1.61566	0.0211173
ENSG00000153234	NR4A2	-1.61451	0.000289398
ENSG00000270362	HMGN3-AS1	-1.61216	0.00225525
ENSG00000069702	TGFBR3	-1.61202	2.48802e-18
ENSG00000228274		-1.61002	0.00140164
ENSG00000224418	STK24-AS1	-1.60424	0.0101243
ENSG00000134243	SORT1	-1.60292	2.81298e-37
ENSG00000205611	LINC01597	-1.60157	1.81783e-18
ENSG00000134253	TRIM45	-1.60121	1.243e-09
ENSG00000261824	LINC00662	-1.59979	6.68198e-80
ENSG00000172987	HPSE2	-1.59852	1.05111e-09
ENSG00000261404		-1.59845	2.74854e-08
ENSG00000267649		-1.59783	0.0217406
ENSG00000185880	TRIM69	-1.59371	1.76068e-23
ENSG00000285644		-1.59211	0.00379346
ENSG00000225914	TSBP1-AS1	-1.59182	0.000778013
ENSG00000177842	ZNF620	-1.59165	8.85033e-13
ENSG00000229152	ANKRD10-IT1	-1.59071	1.73898e-05
ENSG00000092621	PHGDH	-1.59013	6.97761e-125
ENSG00000175548	ALG10B	-1.58302	5.13726e-18
ENSG00000225486		-1.5783	0.0296063
ENSG00000247400	DNAJC3-DT	-1.57737	2.8336e-06
ENSG00000223891	OSER1-DT	-1.57697	0.00512465
ENSG00000232160	RAP2C-AS1	-1.57647	0.00766903
ENSG00000133958	UNC79	-1.56998	0.0287398
ENSG00000213190	MLLT11	-1.56952	1.2339e-42
ENSG00000104883	PEX11G	-1.56949	0.0166656
ENSG00000178947	SMIM10L2A	-1.56757	0.0015759
ENSG00000172426	RSPH9	-1.56452	0.00473217
ENSG00000123870	ZNF137P	-1.56409	0.00153324
ENSG00000176473	WDR25	-1.56353	1.35169e-10
ENSG00000130700	GATA5	-1.56239	1.77277e-07
ENSG00000213967	ZNF726	-1.56237	1.518e-09
ENSG00000165030	NFIL3	-1.56175	9.46576e-05
ENSG00000232859	LYRM9	-1.56078	0.00115141
ENSG00000163075	CFAP221	-1.56073	0.00710249
ENSG00000129675	ARHGEF6	-1.56022	6.61989e-08
ENSG00000165923	AGBL2	-1.55774	3.25812e-05
ENSG00000069696	DRD4	-1.55455	0.00974885
ENSG00000267106	ZNF561-AS1	-1.5519	2.62369e-06
ENSG00000158164	TMSB15A	-1.5512	0.000107762
ENSG00000186409	CCDC30	-1.55003	0.00112182
ENSG00000233184		-1.5493	7.01851e-07
ENSG00000223764	LINC02593	-1.54821	3.01549e-14
ENSG00000181284	TMEM102	-1.54699	0.00204229
ENSG00000198153	ZNF849P	-1.54435	0.02183
ENSG00000236778	INTS6-AS1	-1.53841	0.00142561
ENSG00000132688	NES	-1.53581	1.22787e-214
ENSG00000108947	EFNB3	-1.53538	7.93136e-16
ENSG00000167562	ZNF701	-1.53322	2.29548e-11
ENSG00000170542	SERPINB9	-1.53317	1.17382e-10
ENSG00000266934		-1.53238	0.00278925
ENSG00000261474		-1.52945	0.0185903
ENSG00000255920	CCND2-AS1	-1.52815	0.0134907
ENSG00000116717	GADD45A	-1.52814	9.59161e-22
ENSG00000198342	ZNF442	-1.52794	4.15089e-10
ENSG00000285331		-1.52726	0.0196134
ENSG00000271754		-1.52442	0.0279867
ENSG00000268521	VN1R83P	-1.52266	0.0109815
ENSG00000247950	SEC24B-AS1	-1.52105	0.00747314
ENSG00000184602	SNN	-1.51648	3.37362e-15
ENSG00000109680	TBC1D19	-1.51584	0.000110587
ENSG00000102316	MAGED2	-1.51432	1.55803e-61
ENSG00000197647	ZNF433	-1.51379	7.88631e-07
ENSG00000148143	ZNF462	-1.51354	3.14375e-44
ENSG00000138814	PPP3CA	-1.51293	0.0396457
ENSG00000174871	CNIH2	-1.51284	5.94755e-06
ENSG00000182459	TEX19	-1.51194	0.00136399
ENSG00000273382		-1.50717	0.00358635
ENSG00000250312	ZNF718	-1.50641	5.8777e-27
ENSG00000173041	ZNF680	-1.50398	6.03124e-19
ENSG00000168209	DDIT4	-1.50341	1.2223e-59
ENSG00000206341	HLA-H	-1.50163	1.70555e-06
ENSG00000180346	TIGD2	-1.50102	1.27998e-41
ENSG00000049239	H6PD	-1.4988	5.14388e-42
ENSG00000258352	IFITM3P6	-1.49804	0.00352251
ENSG00000246090		-1.4978	0.0108341
ENSG00000213988	ZNF90	-1.49564	7.60597e-14
ENSG00000261056		-1.49507	0.0330415
ENSG00000166387	PPFIBP2	-1.49416	5.59359e-11
ENSG00000006453	BAIAP2L1	-1.49203	8.18915e-41
ENSG00000272572		-1.48886	0.0167148
ENSG00000267221	C17orf113	-1.48269	0.0246124
ENSG00000260948		-1.48247	0.0240812
ENSG00000125347	IRF1	-1.47897	6.96589e-56
ENSG00000261342		-1.47621	0.00106315
ENSG00000125744	RTN2	-1.47608	1.31996e-16
ENSG00000225470	JPX	-1.47561	9.16051e-44
ENSG00000229321		-1.47168	0.0205779
ENSG00000181744	DIPK2A	-1.46522	2.78366e-10
ENSG00000183853	KIRREL1	-1.46466	2.45419e-163
ENSG00000235859		-1.4643	0.00861254
ENSG00000153132	CLGN	-1.46384	2.3674e-06
ENSG00000242615		-1.4638	0.0117546
ENSG00000151012	SLC7A11	-1.46232	3.90065e-52
ENSG00000163362	INAVA	-1.46152	3.72595e-18
ENSG00000271277		-1.46057	0.00060686
ENSG00000184979	USP18	-1.46038	9.91201e-08
ENSG00000155970	MICU3	-1.45764	3.64925e-14
ENSG00000035115	SH3YL1	-1.4567	3.52419e-19
ENSG00000285184		-1.45646	0.00136315
ENSG00000271335		-1.45645	0.00045887
ENSG00000261335		-1.45564	0.0139309
ENSG00000115267	IFIH1	-1.45549	4.25794e-07
ENSG00000246465		-1.45099	0.0481812
ENSG00000112773	TENT5A	-1.44965	3.97556e-06
ENSG00000130766	SESN2	-1.44666	3.51808e-68
ENSG00000156140	ADAMTS3	-1.44309	1.54638e-39
ENSG00000171388	APLN	-1.44274	0.0463169
ENSG00000130513	GDF15	-1.44223	1.90087e-17
ENSG00000085465	OVGP1	-1.44164	0.013404
ENSG00000125122	LRRC29	-1.44104	0.0282515
ENSG00000137936	BCAR3	-1.44084	0.000371641
ENSG00000146197	SCUBE3	-1.44067	1.69626e-05
ENSG00000095015	MAP3K1	-1.44002	4.10387e-14
ENSG00000163071	SPATA18	-1.43879	2.50007e-09
ENSG00000148408	CACNA1B	-1.43676	3.04649e-12
ENSG00000181264	TLCD5	-1.43544	5.99355e-18
ENSG00000130518	IQCN	-1.43413	0.00406033
ENSG00000205220	PSMB10	-1.4325	0.000122924
ENSG00000254394		-1.43174	2.20435e-09
ENSG00000112874	NUDT12	-1.42665	1.28964e-13
ENSG00000237594		-1.42274	0.00536138
ENSG00000241399	CD302	-1.42117	0.0130818
ENSG00000161638	ITGA5	-1.42116	4.19223e-79
ENSG00000187867	PALM3	-1.42064	1.6199e-23
ENSG00000133640	LRRIQ1	-1.41774	0.0385558
ENSG00000286190		-1.41232	0.0156078
ENSG00000166900	STX3	-1.41016	1.71191e-25
ENSG00000108309	RUNDC3A	-1.409	1.10455e-05
ENSG00000236432	MFF-DT	-1.40748	0.0172695
ENSG00000166963	MAP1A	-1.40597	3.61161e-99
ENSG00000139187	KLRG1	-1.40562	0.021608
ENSG00000138640	FAM13A	-1.40505	3.29106e-55
ENSG00000143147	GPR161	-1.40497	2.42985e-10
ENSG00000140043	PTGR2	-1.40492	2.05205e-06
ENSG00000239218	RPS20P22	-1.40436	0.000545211
ENSG00000261054		-1.40346	0.0263682
ENSG00000162746	FCRLB	-1.40314	0.0178231
ENSG00000113739	STC2	-1.40244	7.1978e-76
ENSG00000271270	TMCC1-AS1	-1.40167	1.12863e-22
ENSG00000144026	ZNF514	-1.40064	1.88775e-24
ENSG00000122484	RPAP2	-1.39963	2.86717e-43
ENSG00000187601	MAGEH1	-1.39453	2.37967e-07
ENSG00000164294	GPX8	-1.3938	1.28097e-37
ENSG00000259319		-1.39343	0.000152501
ENSG00000174498	IGDCC3	-1.39337	3.39831e-09
ENSG00000266904	LINC00663	-1.39208	0.00681054
ENSG00000105538	RASIP1	-1.38902	0.0170288
ENSG00000148154	UGCG	-1.38882	2.18776e-55
ENSG00000175893	ZDHHC21	-1.38872	1.12196e-48
ENSG00000177854	TMEM187	-1.38733	0.00370917
ENSG00000117477	CCDC181	-1.38683	0.0276261
ENSG00000198947	DMD	-1.38658	2.85818e-244
ENSG00000152926	ZNF117	-1.38619	4.89751e-07
ENSG00000249158	PCDHA11	-1.38397	0.000263024
ENSG00000112812	PRSS16	-1.38204	1.18276e-06
ENSG00000286873		-1.38065	0.0381017
ENSG00000270019		-1.37564	0.00508355
ENSG00000123384	LRP1	-1.37215	3.2216e-84
ENSG00000223960	CHROMR	-1.37078	2.69545e-15
ENSG00000197863	ZNF790	-1.36836	4.34542e-07
ENSG00000287168		-1.3681	4.69002e-06
ENSG00000087301	TXNDC16	-1.368	2.50165e-11
ENSG00000107968	MAP3K8	-1.36789	0.000290479
ENSG00000119917	IFIT3	-1.36555	7.34855e-23
ENSG00000270977		-1.36492	0.0263367
ENSG00000281706		-1.36228	0.0205779
ENSG00000036054	TBC1D23	-1.36084	1.55024e-37
ENSG00000185215	TNFAIP2	-1.36076	9.17604e-08
ENSG00000226824		-1.35917	4.35879e-05
ENSG00000246174	KCTD21-AS1	-1.35851	7.59871e-05
ENSG00000197124	ZNF682	-1.35679	0.000102599
ENSG00000170581	STAT2	-1.35513	2.22552e-23
ENSG00000102738	MRPS31	-1.35266	7.79343e-15
ENSG00000250722	SELENOP	-1.34964	0.0122107
ENSG00000131018	SYNE1	-1.3461	1.57649e-09
ENSG00000186310	NAP1L3	-1.34247	1.6155e-09
ENSG00000182986	ZNF320	-1.3424	5.58392e-06
ENSG00000267147	LINC01842	-1.34231	0.0237802
ENSG00000137992	DBT	-1.34217	4.06958e-28
ENSG00000279048		-1.34153	0.0173359
ENSG00000124374	PAIP2B	-1.34136	0.016523
ENSG00000145362	ANK2	-1.34113	1.12005e-16
ENSG00000163840	DTX3L	-1.34105	2.02707e-52
ENSG00000143126	CELSR2	-1.34098	1.86582e-27
ENSG00000081320	STK17B	-1.33878	2.81747e-20
ENSG00000272767	JMJD1C-AS1	-1.33709	6.88854e-12
ENSG00000164039	BDH2	-1.33592	0.000272628
ENSG00000156453	PCDH1	-1.33445	0.000384037
ENSG00000232533		-1.33067	0.00136885
ENSG00000257178		-1.32906	0.00876967
ENSG00000238113	LINC01410	-1.32556	1.15962e-06
ENSG00000164307	ERAP1	-1.32553	1.91089e-54
ENSG00000150773	PIH1D2	-1.32495	0.045607
ENSG00000100271	TTLL1	-1.32435	6.64954e-05
ENSG00000165475	CRYL1	-1.32253	0.0291131
ENSG00000266265	KLF14	-1.32118	1.83174e-05
ENSG00000025434	NR1H3	-1.31855	1.20027e-07
ENSG00000267598		-1.31755	0.0179932
ENSG00000072195	SPEG	-1.3127	4.93029e-07
ENSG00000116885	OSCP1	-1.31257	0.000995503
ENSG00000253710	ALG11	-1.31251	4.8273e-15
ENSG00000132801	ZSWIM3	-1.31179	0.0132181
ENSG00000100968	NFATC4	-1.31043	1.81898e-27
ENSG00000272269		-1.31042	0.00475247
ENSG00000160352	ZNF714	-1.30963	3.67478e-26
ENSG00000233421	LINC01783	-1.30704	0.0295314
ENSG00000128607	KLHDC10	-1.30512	4.45854e-74
ENSG00000152078	TLCD4	-1.30376	2.77525e-20
ENSG00000248515		-1.30346	0.0353863
ENSG00000076706	MCAM	-1.30223	4.26244e-05
ENSG00000118503	TNFAIP3	-1.30095	0.0114679
ENSG00000257027		-1.29822	0.00390003
ENSG00000107020	PLGRKT	-1.29613	3.18048e-07
ENSG00000103599	IQCH	-1.29554	0.0195123
ENSG00000153363	LINC00467	-1.29348	2.55766e-08
ENSG00000143443	C1orf56	-1.29269	1.58806e-05
ENSG00000277151		-1.29263	0.0448359
ENSG00000213096	ZNF254	-1.29217	9.48528e-18
ENSG00000213799	ZNF845	-1.29167	2.24544e-19
ENSG00000250133	HOXC-AS2	-1.29147	1.10244e-10
ENSG00000120696	KBTBD7	-1.2895	3.25115e-22
ENSG00000121871	SLITRK3	-1.2894	0.0312539
ENSG00000157873	TNFRSF14	-1.28765	9.93164e-06
ENSG00000188760	TMEM198	-1.28466	3.31568e-06
ENSG00000139915	MDGA2	-1.28296	1.85533e-35
ENSG00000259985		-1.28228	0.0497821
ENSG00000160445	ZER1	-1.27424	7.24981e-16
ENSG00000214654	B3GNT10	-1.27314	2.05608e-05
ENSG00000154059	IMPACT	-1.27286	1.38794e-20
ENSG00000225891	DHDDS-AS1	-1.27199	0.0423053
ENSG00000226819	MEIS1-AS3	-1.27068	0.00444029
ENSG00000119801	YPEL5	-1.26922	2.18045e-08
ENSG00000235092	ID2-AS1	-1.2676	0.000178113
ENSG00000168818	STX18	-1.26689	3.66669e-35
ENSG00000136490	LIMD2	-1.26647	6.87415e-08
ENSG00000260285		-1.26476	0.0178857
ENSG00000267260		-1.2647	0.0322818
ENSG00000274349	ZNF658	-1.26381	0.00203364
ENSG00000276248		-1.26325	0.00746885
ENSG00000214194	SMIM30	-1.26303	6.71575e-06
ENSG00000246350		-1.26076	0.00311447
ENSG00000182612	TSPAN10	-1.25955	0.0333962
ENSG00000197321	SVIL	-1.258	3.55989e-49
ENSG00000166450	PRTG	-1.25779	2.88484e-64
ENSG00000175322	ZNF519	-1.25682	2.77315e-10
ENSG00000213888	LINC01521	-1.25538	0.000930543
ENSG00000204965	PCDHA5	-1.25504	0.026827
ENSG00000187676	B3GLCT	-1.25489	1.85888e-17
ENSG00000173281	PPP1R3B	-1.25413	2.26399e-28
ENSG00000100918	REC8	-1.25351	5.339e-06
ENSG00000269486	ERVK9-11	-1.25323	0.00369562
[truncated: 265 more rows]

## Sheet: Table 7
Table 7. Cisplatin-responsive genes primed in Acis
gene	gene_name	log2FC	padj	Reported as damage- or cisplatin-associated.
ENSG00000154122	ANKH	9.8967	1.31467e-15	no
ENSG00000136535	TBR1	8.77452	1.55863e-63	no
ENSG00000258334		5.64809	0.000121704	no
ENSG00000007944	MYLIP	4.85086	5.2301e-22	no
ENSG00000122877	EGR2	4.68536	4.37369e-89	no
ENSG00000172830	SSH3	4.57625	3.15677e-48	no
ENSG00000124713	GNMT	4.44824	0.00870119	yes
ENSG00000170608	FOXA3	4.0385	7.95901e-10	no
ENSG00000188051	TMEM221	3.772	0.000380193	no
ENSG00000185988	PLK5	3.46364	2.54171e-08	yes
ENSG00000140961	OSGIN1	3.43273	9.92255e-36	yes
ENSG00000115226	FNDC4	3.0921	1.09903e-10	no
ENSG00000111679	PTPN6	3.09197	2.44282e-18	yes
ENSG00000234869		3.01394	0.00826568	no
ENSG00000163273	NPPC	2.89075	4.2901e-14	no
ENSG00000154040	CABYR	2.84145	5.37237e-22	yes
ENSG00000182759	MAFA	2.81125	1.01579e-30	no
ENSG00000124216	SNAI1	2.71618	3.31558e-18	yes
ENSG00000240038	AMY2B	2.69495	0.00117488	no
ENSG00000004838	ZMYND10	2.68945	4.49483e-06	yes
ENSG00000261026		2.57308	0.00291485	no
ENSG00000177606	JUN	2.53494	4.66494e-15	yes
ENSG00000198576	ARC	2.53219	3.21708e-62	no
ENSG00000177374	HIC1	2.41554	6.37688e-70	yes
ENSG00000101222	SPEF1	2.30855	0.000216377	no
ENSG00000225578	NCBP2-AS1	2.15177	0.0339485	no
ENSG00000179388	EGR3	2.06892	1.40232e-50	yes
ENSG00000145632	PLK2	2.02594	4.01128e-118	yes
ENSG00000104140	RHOV	1.96589	1.82617e-12	no
ENSG00000149564	ESAM	1.91901	0.000102708	no
ENSG00000141682	PMAIP1	1.90763	9.03062e-11	yes
ENSG00000263050		1.86109	0.0359904	no
ENSG00000167588	GPD1	1.85699	0.0463169	no
ENSG00000167874	TMEM88	1.80292	0.0482554	yes
ENSG00000267607		1.79632	2.33316e-08	no
ENSG00000120738	EGR1	1.72698	7.5954e-161	yes
ENSG00000127528	KLF2	1.6419	2.39761e-19	yes
ENSG00000184545	DUSP8	1.36626	0.0247046	yes
ENSG00000259462	CPEB1-AS1	1.34465	0.0100898	no
ENSG00000265972	TXNIP	1.319	0.000902273	yes
ENSG00000173334	TRIB1	1.31619	1.33397e-23	yes
ENSG00000113070	HBEGF	1.30168	1.13744e-09	yes
ENSG00000130066	SAT1	1.29632	4.74809e-10	yes
ENSG00000167034	NKX3-1	1.26858	0.00527695	yes
ENSG00000149781	FERMT3	1.25691	0.0233545	yes
ENSG00000160207	HSF2BP	1.18757	0.0125259	yes
ENSG00000287707		1.17943	0.000286501	no
ENSG00000158050	DUSP2	1.15356	1.57277e-14	no
ENSG00000198003	CCDC151	1.15055	0.0434638	no
ENSG00000268798		1.1169	0.0152421	no
ENSG00000089692	LAG3	1.10268	0.00932369	yes
ENSG00000168811	IL12A	1.09599	0.0098572	yes
ENSG00000185522	LMNTD2	1.04634	0.0362556	no
ENSG00000260806		1.0428	0.0342542	no
ENSG00000278000		1.00544	0.00834525	no
ENSG00000212607	SNORA3B	1.00334	0.0283576	no
