# Supplementary material for: Genomic Characterization of Cisplatin Response Uncovers Priming of Cisplatin-Induced Genes in a Resistant Cell Line
Source: Int J Mol Sci. 2021 May 28;22(11):5814. doi: 10.3390/ijms22115814 (PMC8198185; doi:10.3390/ijms22115814)
Supplement: Supplementary file 1 [file ijms-22-05814-s001.zip › Supplementry Table 8 - Real Time PCR primers.xlsx]

## Sheet: Table 8
Gene name	Forward/Reverse	Sequence
SNAI1	F	ACCCACACTGGCGAGAAG
	R	GGACTCTTGGTGCTTGTGGA
ARC	F	AGAGTAGAAGTCGCACACGC
	R	GTGGGAACCTTGAGACCTGT
TBR1	F	AATTTCACCGGCACCAAACG
	R	AGACCCGATTTCCTTGCACA
MYLIP	F	CAACCAGAGCCCTTCACACT
	R	GCAGACGGGACATGACTGTA
OSGIN1	F	TGCAGAAGAAGCGAAGAGGT
	R	GACTACAGCACCGGACACAA
EGR2	F	ACATCTACCCGGTGGAGGAC
	R	TCAATGTTGATCATGCCATCTCC
RHOV	F	ACAGCGGGACAGGAGGATTT
	R	GGGCAGCCATTTCTCTGTGA
cycloA	F	GTCAACCCCACCGTGTTCTT
	R	CTGCTGTCTTTGGGACCTTGT
hTBP	F	CGCCAGCTTCGGAGAGTTC
	R	ACAACCAAGATTCACTGTGGATACA
